# Supplementary material for: Service use, clinical outcomes and user experience associated with urgent care services that use telephone-based digital triage: a systematic review
Source: PubMed Central journal article supplement — BMJ Open. 2022 Jan 3;12(1):e051569. doi: 10.1136/bmjopen-2021-051569 (PMC8724705; doi:10.1136/bmjopen-2021-051569), 2022-01-03
Supplement: bmjopen-2021-051569.draft_revisions.pdf [file bmjopen-2021-051569.draft_revisions.pdf]

# BMJ Open

BMJ Open is committed to open peer review. As part of this commitment we make the peer review history of every article we publish publicly available.

When an article is published we post the peer reviewers' comments and the authors' responses online. We also post the versions of the paper that were used during peer review. These are the versions that the peer review comments apply to.

The versions of the paper that follow are the versions that were submitted during the peer review process. They are not the versions of record or the final published versions. They should not be cited or distributed as the published version of this manuscript.

BMJ Open is an open access journal and the full, final, typeset and author-corrected version of record of the manuscript is available on our site with no access controls, subscription charges or pay-per-view fees (<http://bmjopen.bmj.com>).

If you have any questions on BMJ Open's open peer review process please email [info.bmjopen@bmj.com](mailto:info.bmjopen@bmj.com)

# BMJ Open

## Service use, clinical outcomes and user experience associated with urgent care services that utilise telephone based digital triage: A systematic review

|                               |                                                                                                                                                                                                                                                      |
|-------------------------------|------------------------------------------------------------------------------------------------------------------------------------------------------------------------------------------------------------------------------------------------------|
| Journal:                      | <i>BMJ Open</i>                                                                                                                                                                                                                                      |
| Manuscript ID                 | bmjopen-2021-051569                                                                                                                                                                                                                                  |
| Article Type:                 | Original research                                                                                                                                                                                                                                    |
| Date Submitted by the Author: | 23-Mar-2021                                                                                                                                                                                                                                          |
| Complete List of Authors:     | Sexton, Vanashree; University of Warwick<br>Dale, Jeremy; University of Warwick<br>Bryce, Carol; University of Warwick<br>Barry, James; University of Warwick<br>Sellers, Elizabeth; University of Warwick<br>Atherton, Helen; University of Warwick |
| Keywords:                     | HEALTH SERVICES ADMINISTRATION & MANAGEMENT, Quality in health care < HEALTH SERVICES ADMINISTRATION & MANAGEMENT, Organisation of health services < HEALTH SERVICES ADMINISTRATION & MANAGEMENT                                                     |
|                               |                                                                                                                                                                                                                                                      |

SCHOLARONE™  
Manuscripts

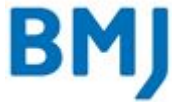

I, the Submitting Author has the right to grant and does grant on behalf of all authors of the Work (as defined in the below author licence), an exclusive licence and/or a non-exclusive licence for contributions from authors who are: i) UK Crown employees; ii) where BMJ has agreed a CC-BY licence shall apply, and/or iii) in accordance with the terms applicable for US Federal Government officers or employees acting as part of their official duties; on a worldwide, perpetual, irrevocable, royalty-free basis to BMJ Publishing Group Ltd ("BMJ") its licensees and where the relevant Journal is co-owned by BMJ to the co-owners of the Journal, to publish the Work in this journal and any other BMJ products and to exploit all rights, as set out in our [licence](#).

The Submitting Author accepts and understands that any supply made under these terms is made by BMJ to the Submitting Author unless you are acting as an employee on behalf of your employer or a postgraduate student of an affiliated institution which is paying any applicable article publishing charge ("APC") for Open Access articles. Where the Submitting Author wishes to make the Work available on an Open Access basis (and intends to pay the relevant APC), the terms of reuse of such Open Access shall be governed by a Creative Commons licence – details of these licences and which [Creative Commons](#) licence will apply to this Work are set out in our licence referred to above.

Other than as permitted in any relevant BMJ Author's Self Archiving Policies, I confirm this Work has not been accepted for publication elsewhere, is not being considered for publication elsewhere and does not duplicate material already published. I confirm all authors consent to publication of this Work and authorise the granting of this licence.

# Service use, clinical outcomes and user experience associated with urgent care services that utilise telephone based digital triage: A systematic review

## Authors

Vanashree Sexton, PhD Student. Unit of Academic Primary Care, Warwick Medical School, University of Warwick, UK. Email address: [ash.sexton@warwick.ac.uk](mailto:ash.sexton@warwick.ac.uk) ORCID iD: 0000-0002-6935-016X

Dr Jeremy Dale, Professor. Unit of Academic Primary Care, Warwick Medical School, University of Warwick, UK. Email address: [jeremy.dale@warwick.ac.uk](mailto:jeremy.dale@warwick.ac.uk) ORCID iD: 0000-0001-9256-3553

Dr Carol Bryce, Research fellow. Unit of Academic Primary Care, Warwick Medical School, University of Warwick, UK. Email address: [c.bryce.1@warwick.ac.uk](mailto:c.bryce.1@warwick.ac.uk) ORCID iD: 0000-0003-1484-9032

James Barry, Medical student, Warwick Medical School, University of Warwick, UK. Email address: [james.barry@warwick.ac.uk](mailto:james.barry@warwick.ac.uk)

Elizabeth Sellers, Medical student, Warwick Medical School, University of Warwick, UK. Email address: [lizzie.sellers@warwick.ac.uk](mailto:lizzie.sellers@warwick.ac.uk)

Dr Helen Atherton, Associate professor. Unit of Academic Primary Care, Warwick Medical School, University of Warwick, UK. Email address: [h.atherton@warwick.ac.uk](mailto:h.atherton@warwick.ac.uk) ORCID iD: 0000-0002-7072-1925

**Corresponding Author:** Vanashree Sexton, PhD Student. Unit of Academic Primary Care, Warwick Medical School, University of Warwick, Gibbet Hill, Coventry, CV7 4AL, UK. Email address: [ash.sexton@warwick.ac.uk](mailto:ash.sexton@warwick.ac.uk)

**Word count (excluding abstract):** 3779

## 1 Abstract

2  
3  
4  
5  
6  
7 **Objective** To evaluate service use, clinical outcomes and user experience related to telephone-based  
8  
9 triage in urgent out of hours care.

10  
11  
12 **Design** Systematic review and narrative synthesis.

13  
14  
15 **Methods** Studies were identified through searches of Medline, Embase, CINAHL, Web of Science,  
16  
17 and Scopus. All study types were included. Quality was assessed using the Mixed Methods Appraisal  
18  
19 Tool (MMAT). Narrative synthesis was used to analyse findings.

20  
21  
22  
23 **Results** Thirty-one studies were included, with the majority being UK-based; most investigated nurse  
24  
25 led digital triage (n=26). Eight evaluated the impact on wider healthcare service use following digital  
26  
27 triage implementation, typically reporting reduction or no change in service use. Six investigated  
28  
29 patient level service use, showing mixed findings relating to patients' adherence with triage advice.  
30  
31 Evaluation of clinical outcomes was limited. Four studies reported on hospitalisation rates of digitally  
32  
33 triaged patients, and highlighted potential triage errors where patients appeared to have not been  
34  
35 given sufficiently high urgency advice. Overall, service users reported high levels of satisfaction, in  
36  
37 studies of both clinician and non-clinician led digital triage, but with some dissatisfaction over the  
38  
39 relevance and number of triage questions.  
40  
41  
42

43  
44 **Conclusions** Further research is needed into patient level service use, including patients' adherence  
45  
46 with triage advice and how this influences subsequent use of services. Further evaluation of clinical  
47  
48 outcomes, using larger datasets and comparison of different digital triage systems is needed to  
49  
50 explore consistency and safety. The safety and effectiveness of non-clinician led digital triage also  
51  
52 needs evaluation. Such evidence should contribute to improvement of digital triage tools and  
53  
54 service delivery.  
55  
56

57  
58 **PROSPERO registration number** 2020 CRD42020178500  
59  
60

## Strengths and limitations of this study

- This is the first systematic review to focus on the use of telephone based digital triage in urgent care
- This is a comprehensive, mixed methods review covering a 20 year period, enabling evaluation of literature following shifts of some services to non-clinician led models of service delivery
- Outcomes relating to broader utilisation of services, cost effectiveness, and staff focussed outcomes were not within the review scope.
- The review was limited to studies published in English, which may have led to some evidence being overlooked

## Background

Telephone based digital triage is widely used in urgent care(1, 2). Urgent care is the “the range of responses that health and care services provide to people who require – or who perceive the need for – urgent advice, treatment or diagnosis”(3), and includes national or regional help-lines, out of hours centres and emergency care providers.

Digital triage involves a call handler or clinician using a digital triage tool to generate advice based on an assessment of a patient’s symptoms. Advice typically takes the form of signposting within defined levels of urgency to specific local services, such as an emergency department (ED), out of hours centre or general practice (GP) appointment; in some cases self-care advice is given.

Digital triage service delivery models vary widely; in England and Scotland digital triage is delivered by non-clinical call handlers, for example, through the 111 service, whilst in most other countries with a national help-line it is predominantly clinician (nurse) led(4-9). In part, digital triage has been

1  
2  
3 1 implemented in response to increasing demand on primary care and EDs in the last several  
4  
5 2 decades(10).  
6  
7

8 3 Despite wide adoption, there is limited evaluation of its impact on wider healthcare service use,  
9  
10 4 clinical outcomes and user experience. No previous systematic reviews have focussed solely on  
11  
12 5 services that utilise digital triage; instead reviewing telephone consultation and triage more broadly,  
13  
14 6 including services that use digital triage and those that are not digitally supported(1, 10, 11).  
15  
16  
17

18 7 One review indicated that 50% of calls in the general healthcare setting (with studies predominantly  
19  
20 8 conducted in primary care settings) could be handled completely over the telephone, showing the  
21  
22 9 potential of telephone triage to manage face to face care demand(10). However, there are mixed  
23  
24 10 findings relating to wider healthcare service use and very limited investigation of clinical  
25  
26 11 outcomes(10). A previous review reported a high level of user satisfaction(10), while another  
27  
28 12 highlighted that satisfaction with advice related to improved compliance with advice(11).  
29  
30  
31

32 13 Given technological development and, in some cases, the reorganisation of services in recent  
33  
34 14 years(2), systematic reviews conducted several years ago (between 2005 and 2012)(1, 10-13) may  
35  
36 15 have limited relevance to today's services.  
37  
38  
39

40 16 This review addresses the need for an up-to date evaluation of telephone-based digital triage. It  
41  
42 17 aims to evaluate wider health care service use, clinical outcomes and user experience related to its  
43  
44 18 implementation in a range of urgent care settings in order to identify areas for improvement and the  
45  
46 19 need for further research.  
47  
48  
49

50 20

51 21

52 22

53 23

54 24

55 25

56 26

57 27

58 28

59 29

60 30

## Method

This review is reported according to the Preferred Reporting Items for Systematic Reviews and Meta-Analyses (PRISMA) framework. See appendix 1 for the PRISMA checklist. The protocol has been published (<https://rdcu.be/cdwOD>)(14) and is registered on PROSPERO (2020 CRD42020178500).

## Patient and public involvement (PPI)

This review forms the first stage of a wider project investigating patient and carer outcomes relating to telephone based digital triage, which aims to contribute towards improved service delivery and user experience. In the wider project, patient and participant input, through 1-1 discussions, has been sought in the design, and will be included at later stages of interpretation and dissemination of findings.

## Eligibility criteria

1. *Population*: studies that evaluated digital triage in the general population or within population sub-groups (for example older people).
2. *Interventions*: studies that assessed telephone based digital triage:
  - a. In services operating out of hours to provide urgent care
  - b. That was used in the general population (not condition specific services);
  - c. That results in signposting advice (referral to a local service such as ED, GP or ambulance dispatch) and/or self care advice
3. *Outcomes*: studies that evaluated at least one of the following: characteristics of service users and triage advice; healthcare service use following triage; clinical outcomes (including hospitalisations and mortality); and service user experience.



1  
2  
3 1 All empirical study types published in the last 20 years in English were included: qualitative,  
4  
5 2 quantitative and mixed methods studies.  
6  
7  
8  
9 3

#### 11 4 **Search strategy**

12  
13 5

14  
15 6 The search strategy was designed with support from a librarian. Searches were conducted in  
16  
17 7 Medline, Embase, CINAHL, Web of Science, and Scopus. Terms relating to digital triage and urgent  
18  
19 8 care settings (excluding in-hours general practice) were used, the Medline search terms are provided  
20  
21 9 in appendix 2. The search was restricted to studies published between the years 2000 – 2020 in  
22  
23  
24 10 English, including electronically published (Epub) studies ahead of print. Reference hand-searches  
25  
26 11 were conducted for all included full texts.  
27  
28  
29  
30  
31 12  
32 13

#### 33 14 **Study selection and data extraction**

34  
35 15

36 16 Articles were de-duplicated ahead of study selection. Two reviewers screened studies independently  
37  
38 17 at title and abstract stage and at full text stage using Covidence software. Any disagreements were  
39  
40 18 resolved through discussion between the reviewers; where necessary a third reviewer was  
41  
42  
43 19 consulted. A PRISMA flow chart was developed (appendix 3).  
44  
45  
46  
47  
48  
49  
50  
51  
52  
53  
54  
55  
56  
57  
58  
59  
60

20 A data extraction form was developed and initially piloted on three studies to confirm that key  
21  
22 21 elements of studies were captured. See appendix 4 for data extraction fields. Data were extracted  
23  
24 22 independently by two reviewers, and any discrepancies were resolved through discussion with a  
25  
26  
27  
28  
29  
30  
31  
32  
33  
34  
35  
36  
37  
38  
39  
40  
41  
42  
43  
44  
45  
46  
47  
48  
49  
50  
51  
52  
53  
54  
55  
56  
57  
58  
59  
60  
23 third reviewer. Study authors were contacted in cases where clarifications regarding study conduct  
24  
25 were required.

## Quality assessment

Quality assessment, including risk of bias, was conducted by two reviewers using the Mixed Methods Appraisal Tool (MMAT)(15). Based on the number of MMAT criteria met, studies were categorised as high (if all five MMAT criteria were met), medium (if 3 or 4 criteria were met) or low quality (if 2 or less criteria were met).

## Data synthesis

Narrative synthesis(16) was used due to the diversity of designs in the included studies. This included: generating a preliminary synthesis, exploring relationships in findings across studies, assessing the robustness of the evidence and summarising findings(16). Statistical meta-analysis was not possible due to the heterogeneity of the included studies.

## Results

Thirty-one studies were included, most were of quantitative design (n=25)(5, 7, 17-39) including: routine data analyses(n=16)(5, 7, 17-23, 25, 27, 32, 33, 35-37), surveys(n=6)(24, 26, 29, 31, 38, 39), controlled trials (n=2)(28, 34), and a quantitative descriptive study (n=1)(40). There were fewer qualitative (n=4)(41-44) and mixed methods studies (n=2)(6, 45).

Studies were mainly from the UK (n=17)(5, 6, 18, 19, 21, 24-27, 30, 34-36, 38, 41, 42, 45), with small numbers from Sweden (n=4)(39, 43, 44, 46), Australia (n=4)(28, 29, 32, 37), USA (n=3)(7, 17, 20), Netherlands (n=2)(23, 31), Japan (n=1)(33) and Portugal (n=1)(22). Most included the full range of service users (n=24)(5, 6, 17, 19-24, 26, 28, 30-34, 36-39, 42-45), but some focussed on subsets: older adults(19, 22), younger age groups(18, 35), parents of children(29), men(41) or adults with limited English proficiency(LEP)(7).

1  
2  
3 1 Most studies evaluated digital triage conducted by nurses (n=26)(5, 7, 17-32, 35, 37, 39, 41-45), but  
4  
5 2 some included non-clinicians (n=3)(6, 36, 38), nurses and paramedics (n= 1)(34), or nurses and non-  
6  
7 3 clinical call handler (n=1)(33).  
8  
9  
10 4 Most studies were of identifiable call centre-based services: England's former NHS Direct(18, 19, 21,  
11  
12 5 24, 26, 27, 35, 41-43, 45) and current NHS 111 service(36, 38), Scotland's NHS24(5, 6), USA's  
13  
14 6 MayoClinic(7, 17, 20), Portugal's Linha Saude 24(22), Swedish Health Direct(39, 43, 44), Australia's  
15  
16 7 Health Direct(32). A few involved smaller scale 'unnamed' implementations(28, 37) or general  
17  
18 8 practice cooperatives(23, 30, 31). Two were based in the emergency setting, one within an English  
19  
20 9 ambulance service(34) and one of an emergency telephone service in Japan(33).  
21  
22  
23  
24  
25 10 Nineteen studies were rated as being of high quality(5-7, 19, 21-24, 27, 31, 32, 34-37, 41-44), eleven  
26  
27 11 medium(17, 18, 20, 25, 26, 28-30, 33, 38, 39) and one was low(45). Qualitative studies tended to be  
28  
29 12 of higher quality, whilst quantitative studies were more variable. Table 1 shows characteristics of  
30  
31 13 studies.  
32  
33  
34  
35 14  
36  
37  
38 15  
39  
40  
41 16  
42  
43  
44 17  
45  
46  
47 18  
48  
49  
50 19  
51  
52  
53  
54  
55  
56  
57  
58  
59  
60

1 **Table 1: Characteristics of included studies (31 studies)**

2

| Main outcome area | Author Year Country    | Study design                                                                           | Sample / data size                                                                                                                      | Urgent or Emergency care | Name of service / digital triage tool                           | Participants & service name                     | Comparator                                                                                            | Quality |
|-------------------|------------------------|----------------------------------------------------------------------------------------|-----------------------------------------------------------------------------------------------------------------------------------------|--------------------------|-----------------------------------------------------------------|-------------------------------------------------|-------------------------------------------------------------------------------------------------------|---------|
| User experience   | Björkman 2018 Sweden   | Qualitative: 'Netnographic' method using information from online forums using six step | Data collected from 3 online forums                                                                                                     | Urgent                   | Swedish Healthcare Direct (Nurse)                               | General population                              | None                                                                                                  | High    |
| User experience   | O'Cathain 2013 England | Quantitative: Survey                                                                   | Survey sent to 1200 patients from 4 pilot sites, 1769 responded and were included for analysis                                          | Urgent                   | NHS 111 (triage tool: NHS pathways) (Non-clinical call handler) | General population                              | None                                                                                                  | Medium  |
| User experience   | McAteer 2016 Scotland  | Mixed methods: survey and interviews                                                   | Survey: Age and sex-stratified random sample of 256 adults from each of 14 Scottish GP surgeries, final sample was 1190. Interviews: 30 | Urgent                   | NHS 24 (Non-clinical call handler)                              | General population (NHS 24 users and non-users) | Interviewees (from survey respondents) grouped into satisfied users, dissatisfied users and non-users | High    |

9

|                                  |                       |                              |                                                                    |        |                                   |                            |                                                                                                                                                                                                          |        |
|----------------------------------|-----------------------|------------------------------|--------------------------------------------------------------------|--------|-----------------------------------|----------------------------|----------------------------------------------------------------------------------------------------------------------------------------------------------------------------------------------------------|--------|
|                                  |                       |                              | semi-structured interviews                                         |        |                                   |                            |                                                                                                                                                                                                          |        |
| <b>User experience</b>           | Rahmqvist 2011 Sweden | Quantitative: Survey         | Random sample of 660 callers, made at one SHD site in October 2008 | Urgent | Swedish Healthcare Direct (Nurse) | General population         | 1) Cases: those who disagreed with nurse advice and felt they needed higher level of care; 2) Controls: those who disagreed with nurse advice OR felt they needed higher level of care; 3) other callers | Medium |
| <b>User experience</b>           | Goode 2004 England    | Qualitative: Interview study | 60 interviews.                                                     | Urgent | NHS Direct (Nurse)                | General population         | None                                                                                                                                                                                                     | High   |
| <b>User experience</b>           | Winneby 2014 Sweden   | Qualitative: Interview study | 8 semi-structured interviews                                       | Urgent | Swedish Healthcare Direct (Nurse) | General population         | None                                                                                                                                                                                                     | High   |
| <b>User experience</b>           | Goode 2004 England    | Qualitative: Interview study | 10 semi-structured interviews                                      | Urgent | NHS Direct (Nurse)                | Interviews focussed on men | None                                                                                                                                                                                                     | High   |
| <b>Patterns of triage advice</b> | Payne 2001 England    | Routine data analysis        | 56,450 calls                                                       | Urgent | NHS Direct (Nurse)                | General population         | None - Comparisons within digital triage call data                                                                                                                                                       | High   |

|                                  |                                |                       |                           |        |                                                            |                                                                             |                                                                          |        |
|----------------------------------|--------------------------------|-----------------------|---------------------------|--------|------------------------------------------------------------|-----------------------------------------------------------------------------|--------------------------------------------------------------------------|--------|
| <b>Patterns of triage advice</b> | Elliot 2015<br>Scotland        | Routine data analysis | 1,285,038 calls           | Urgent | NHS24 (Nurse)                                              | General population                                                          | None - Comparisons within digital triage call data                       | High   |
| <b>Patterns of triage advice</b> | Zwaanswijk 2015<br>Netherlands | Routine data analysis | 895 253 patients          | Urgent | Digital triage within General practice cooperative (Nurse) | General population                                                          | Some comparison with non-digital triage                                  | High   |
| <b>Patterns of triage advice</b> | Njeru 2017<br>USA              | Routine data analysis | 587 cases<br>587 controls | Urgent | MayoClinic proprietary (ExpertRN: software) (Nurse)        | Those aged over 18 - (callers with and without limited English proficiency) | Patients with limited English proficiency compared to English proficient | High   |
| <b>Patterns of triage advice</b> | Jacome 2018<br>Portugal        | Routine data analysis | 148,099 calls             | Urgent | Linha Saude 24 (Nurse)                                     | General population (Older age groups 65+)                                   | None - Comparisons within digital triage call data                       | High   |
| <b>Patterns of triage advice</b> | Hsu 2011<br>England            | Routine data analysis | 402,959 calls             | Urgent | NHSDirect (Nurse)                                          | Older age groups (aged over 65 years)                                       | None                                                                     | High   |
| <b>Patterns of triage advice</b> | Cook 2013<br>England           | Routine data analysis | 358 503 calls             | Urgent | NHS Direct (Nurse)                                         | children aged 0–15 (<1, 1–3 and 4–15 years))                                | Comparisons between age groups                                           | Medium |

1  
2  
3  
4  
5  
6  
7  
8  
9  
10  
11  
12  
13  
14  
15  
16  
17  
18  
19  
20  
21  
22  
23  
24  
25  
26  
27  
28  
29  
30  
31  
32  
33  
34  
35  
36  
37  
38  
39  
40  
41  
42  
43  
44  
45  
46

|                                     |                       |                                                                           |                                                                                                                                                     |        |                                                                         |                                                                              |                                                                                                                                                                                       |        |
|-------------------------------------|-----------------------|---------------------------------------------------------------------------|-----------------------------------------------------------------------------------------------------------------------------------------------------|--------|-------------------------------------------------------------------------|------------------------------------------------------------------------------|---------------------------------------------------------------------------------------------------------------------------------------------------------------------------------------|--------|
| <b>Patterns of triage advice</b>    | North 2010 USA        | Routine data analysis                                                     | 20,230 calls to AMC                                                                                                                                 | Urgent | Ask Mayo Clinic (triage tool: ExpertRN) (Nurse)                         | General population (those with access to AskMayo subscription and insurance) | 3 comparison groups: 1. AMC callers; 2. ED attendances 3. Office (GP) visits. (Comparison of hospitalisation following a call to AMC and hospitalisations after an office (GP) visit) | Medium |
| <b>Patterns of triage advice</b>    | North 2011 USA        | Routine data analysis                                                     | Over the three-year period: 105,866 adult calls (65% of the total calls). Of these, 14,646 (14%) were made by a surrogate on behalf of the patient. | Urgent | MayoClinic (Triage tool: ExpertRN: a software) (Nurse)                  | General population (aged over 18)                                            | Surrogate vs. self calls                                                                                                                                                              | Medium |
| <b>Service use following triage</b> | Lattimer 2000 England | Quantitative descriptive: Cost effectiveness report from controlled trial | >14000 Control group (n = 7308 calls) Intervention group i.e. Nurse telephone consultation                                                          | Urgent | Digital triage integrated within a general practice cooperative (Nurse) | General population                                                           | Usual care (referral to a GP) compared to nurse led digital triage                                                                                                                    | Medium |

| (n=7184 calls)                      |                        |                                      |                                                                                                                   |           |                                                                                        |                                                                                                                |                                                                                                                    |        |
|-------------------------------------|------------------------|--------------------------------------|-------------------------------------------------------------------------------------------------------------------|-----------|----------------------------------------------------------------------------------------|----------------------------------------------------------------------------------------------------------------|--------------------------------------------------------------------------------------------------------------------|--------|
| <b>Service use following triage</b> | Munro 2000<br>England  | Routine data analysis                | Study corresponds to the 1st year of operation, where 68 500 NHS direct calls from the 1.3 million people served. | Urgent    | NHS Direct (Nurse)                                                                     | All contacts with these immediate care services (at time spanning before and after introduction of NHS direct) | Service use in regions where NHS Direct was introduced, compared to regions with no NHS direct implementation      | High   |
| <b>Service use following triage</b> | Dale 2003<br>England   | Controlled trial                     | 635 triaged calls<br>611 non-triaged calls                                                                        | Emergency | Computerised decision support system with emergency control room (Nurse and paramedic) | General population, calling the emergency service for non-emergency concerns (only those aged 2+)              | The control group not offered triage was compared with calls digitally triaged either by nurses or paramedics.     | High   |
| <b>Service use following triage</b> | Foster 2003<br>England | Routine data analysis & data linkage | 4493 calls, of which 193 were advised to go to ED                                                                 | Urgent    | NHS Direct (Telephone Advice System software'TAS'). (Nurse)                            | General population                                                                                             | Three comparison groups:<br>1. Callers triaged to A&E who attended<br>2. Callers triaged to A&E who did not attend | Medium |



3. Callers with different triage outcome who attended A&E.

|                                     |                             |                                                                         |                                                                                                                                          |        |                                                                           |                                                                                                           |                                                                                                |        |
|-------------------------------------|-----------------------------|-------------------------------------------------------------------------|------------------------------------------------------------------------------------------------------------------------------------------|--------|---------------------------------------------------------------------------|-----------------------------------------------------------------------------------------------------------|------------------------------------------------------------------------------------------------|--------|
| <b>Service use following triage</b> | Mark 2003<br>England        | Mixed methods (routine data analysis + interviews)                      | Numbers of calls analysed across three years:<br>5126 (year 1998)<br>5702 (1999)<br>4698 (2000)                                          | Urgent | Pilot system within GP cooperative, which later became NHS Direct (Nurse) | General population                                                                                        | n/a                                                                                            | Low    |
| <b>Service use following triage</b> | Sprivulis 2004<br>Australia | Routine data analysis & data linkage                                    | 13 019 presentations to ED of which 842 were identified as having contacted Health- Direct within the 24 h period prior to presentation. | Urgent | HealthDirect (Centramax computerized CDS) (Nurse)                         | General population - All patients who contacted the HealthDirect service during the one year study period | Key groups Those who were triaged by SHD prior to attending ED and those who were not triaged. | High   |
| <b>Service use following triage</b> | Dunt 2005<br>Australia      | Quantitative: four trials including surveys (self-reported service use) | Random sampling (350 households per trial site)                                                                                          | Urgent | "proprietary health call centre software" (Nurse)                         | General population                                                                                        | 2 sites using "standalone" telephone triage which used "call centre software" 2 embedded       | Medium |

1  
2  
3  
4  
5  
6  
7  
8  
9  
10  
11  
12  
13  
14  
15  
16  
17  
18  
19  
20  
21  
22  
23  
24  
25  
26  
27  
28  
29  
30  
31  
32  
33  
34  
35  
36  
37  
38  
39  
40  
41  
42  
43  
44  
45  
46

|                                     |                         |                                        |                                                                                                                                                     |        |                    |                                                                                               |                                                                                                                                                                                                                                                            |        |
|-------------------------------------|-------------------------|----------------------------------------|-----------------------------------------------------------------------------------------------------------------------------------------------------|--------|--------------------|-----------------------------------------------------------------------------------------------|------------------------------------------------------------------------------------------------------------------------------------------------------------------------------------------------------------------------------------------------------------|--------|
|                                     |                         |                                        |                                                                                                                                                     |        |                    |                                                                                               | telephone triage sites using paper based protocols                                                                                                                                                                                                         |        |
| <b>Service use following triage</b> | Munro 2005<br>England   | Quantitative: Surveys (care providers) | 571 surveys sent (188/297) responses from GP cooperatives, (35/35) for ambulance services and (200/239) for emergency departments                   | Urgent | NHS Direct (Nurse) | Surveys sent to care providers (general use of services following NHS direct implementations) | n/a                                                                                                                                                                                                                                                        | Medium |
| <b>Service use following triage</b> | Stewart 2006<br>England | Routine data analysis & data linkage   | 3312 calls to NHS Direct (NHSD) North West Coast, and 14,029 patients who attended ED ( between the 1st of December 2002 and 28th of February 2003) | Urgent | NHS Direct (Nurse) | Children and young adults aged under 16                                                       | 2 matched patient groups: 1) 299 NHSD patients (those advised by NHSD to attend A&E in the last 12 hours) and 2) NHSD-other: 163 those given a different signpost, but who still attended A&E<br>Additional groups: GP referred and self-referred (to A&E) | High   |

|                                     |                                |                              |                                                            |           |                                                                                                                           |                                                                                  |      |        |
|-------------------------------------|--------------------------------|------------------------------|------------------------------------------------------------|-----------|---------------------------------------------------------------------------------------------------------------------------|----------------------------------------------------------------------------------|------|--------|
| <b>Service use following triage</b> | Byrne 2007<br>England          | Quantitative: Survey         | 268 callers                                                | Urgent    | NHS Direct (Nurse)                                                                                                        | General public with 3 symptom types (abdominal pain or cough and/or sore throat) | None | High   |
| <b>Service use following triage</b> | Morimura 2010<br>Japan (Tokyo) | Routine data analysis        | 26,138 telephone consultations                             | Emergency | Tokyo Emergency Telephone Consultation Centre: (#7119) / 'computer programmed medical protocols' (Nurse and call handler) | General population                                                               | None | Medium |
| <b>Service use following triage</b> | Huibers 2013<br>Netherlands    | Quantitative: Questionnaires | 7039 questionnaires returned (from a total of 13,953 sent) | Urgent    | "computerised decision support" (Nurse)                                                                                   | General population (users who had a telephone contact with a nurse)              | None | High   |

|                                     |                            |                                      |                                                              |        |                                                                               |                    |                                                                                                                                                                                                                                                                       |        |
|-------------------------------------|----------------------------|--------------------------------------|--------------------------------------------------------------|--------|-------------------------------------------------------------------------------|--------------------|-----------------------------------------------------------------------------------------------------------------------------------------------------------------------------------------------------------------------------------------------------------------------|--------|
| <b>Service use following triage</b> | Turner 2013<br>England     | Routine data analysis                | 400,000 calls to NHS 111 in first year of operation analysed | Urgent | NHS 111(NHS Pathways) (Nurse)                                                 | General population | 1. Intervention sites: four NHS111 pilot sites<br>2. Control sites (North of Tyne, Leicester, Norfolk) selected to match equivalent geographical areas<br>Sites matched based on 18 criteria covering: demographics, lifestyle, health profile and health service use | High   |
| <b>Service use following triage</b> | Turbitt 2015<br>Australia  | Quantitative: Surveys                | 1150 parents attending ED (decline rate 19.9%)               | Urgent | Victorian nurse-On-Call (similar to Australia's HealthDirect service) (Nurse) | Specific group     | Some comparisons between parents who called and did not call but prior to attending ED                                                                                                                                                                                | Medium |
| <b>Service use following triage</b> | Siddiqui 2019<br>Australia | Routine data analysis & data linkage | 12,741 triaged cases linked to 72.577 ED presentations       | Urgent | Service/tool name Not specified (Nurse)                                       | General population | n/a                                                                                                                                                                                                                                                                   | High   |

1  
2  
3  
4  
5  
6  
7  
8  
9  
10  
11  
12  
13  
14  
15  
16  
17  
18  
19  
20  
21  
22  
23  
24  
25  
26  
27  
28  
29  
30  
31  
32  
33  
34  
35  
36  
37  
38  
39  
40  
41  
42  
43  
44  
45  
46  
47  
48  
49  
50  
51  
52  
53  
54  
55  
56  
57  
58  
59  
60

1  
2  
3  
4  
5  
6  
7  
8  
9  
10  
11  
12  
13  
14  
15  
16  
17  
18  
19  
20  
21  
22  
23  
24  
25  
26  
27  
28  
29  
30  
31  
32  
33  
34  
35  
36  
37  
38  
39  
40  
41  
42  
43  
44  
45  
46  
47  
48  
49  
50  
51  
52  
53  
54  
55  
56  
57  
58  
59  
60

**Patterns of use:**

Nine studies focused on patterns of triage advice; all of the nine utilised routine datasets(5, 7, 17-23). Key findings are summarised in table 2.

For peer review only

1 **Table 2: Characteristics of patients and triage advice (9 studies that utilised routine data analysis)**

| First author<br>Year<br>Country | Sample / data<br>size | Name digital<br>triage service<br>/tool<br>(Staff type) | Participants       | Key findings relating caller/patient characteristics and triage advice                                                                                                                                                                                                                                                                                                                                                                                                                                                                                                                                                                                                                                                                                                                                                                                                                                                                                                                                                                                                                                                                                                                                                                                                                                                                                                                                                                                                                                                                                                                                    |
|---------------------------------|-----------------------|---------------------------------------------------------|--------------------|-----------------------------------------------------------------------------------------------------------------------------------------------------------------------------------------------------------------------------------------------------------------------------------------------------------------------------------------------------------------------------------------------------------------------------------------------------------------------------------------------------------------------------------------------------------------------------------------------------------------------------------------------------------------------------------------------------------------------------------------------------------------------------------------------------------------------------------------------------------------------------------------------------------------------------------------------------------------------------------------------------------------------------------------------------------------------------------------------------------------------------------------------------------------------------------------------------------------------------------------------------------------------------------------------------------------------------------------------------------------------------------------------------------------------------------------------------------------------------------------------------------------------------------------------------------------------------------------------------------|
| Payne<br>2001<br>England        | 56,450 calls          | NHS Direct<br>(Nurse)                                   | General population | <p><b>Patient/symptom characteristics</b></p> <ul style="list-style-type: none"> <li>• The patient was the caller for 45% of calls; 31% of calls were made by parents calling on behalf of their child.</li> <li>• 24% of calls were about 0-5 year olds. 22% were for 17-29 years, and 22% for 30-39 years.</li> </ul> <p><b>Triage advice and urgency</b></p> <ul style="list-style-type: none"> <li>• 0-5 year olds were more likely to be categorised as "no urgency". 17-39 years were more likely to be "routine", and over 70s were more likely to be categorised as urgent.</li> <li>• The majority of calls were prioritised as "no urgency" (56%), 32% were categorised as having some degree of urgency, and 11% were deemed to be routine; Majority of patients were advised to self-care (37%)</li> <li>• n=10,815 referred to a GP, n=2289 referred to A&amp;E, n=2272 referred to community services, n=442 callers referred to ambulance services. Respectively: 29% GP, 6% A&amp;E, 6% community services; 1% ambulance</li> <li>• 0-5 year olds were more likely to be referred to a routine GP appointment or given self-care advice. 17-29 year olds were more likely to be referred to community services or given information. The 30-39 year olds were more likely to be given information or referred to a routine GP appointment.</li> <li>• The over 70s were more likely to have an urgent referral to a GP</li> <li>• Males were more likely to be categorised as urgent &amp; females were more likely to be referred to community services or given information.</li> </ul> |
| Elliot<br>2015                  | 1,285,038 calls       | NHS24<br>(Nurse)                                        | General population | <p><b>Patient/symptom characteristics:</b></p> <ul style="list-style-type: none"> <li>• Abdominal problems accounted for the largest proportion of calls</li> </ul>                                                                                                                                                                                                                                                                                                                                                                                                                                                                                                                                                                                                                                                                                                                                                                                                                                                                                                                                                                                                                                                                                                                                                                                                                                                                                                                                                                                                                                       |

1  
2  
3  
4  
5  
6  
7  
8  
9  
10  
11  
12  
13  
14  
15  
16  
17  
18  
19  
20  
21  
22  
23  
24  
25  
26  
27  
28  
29  
30  
31  
32  
33  
34  
35  
36  
37  
38  
39  
40  
41  
42  
43  
44  
45  
46

**Scotland**

(12.2%) followed by dental (6.8%) and rash/skin problems (6.0%).

- Problems differed more by age group. Rash/skin problems commonest in the under 5's, abdominal problems in 5-74, and breathing problems commonest in those over 75.
- Less affluent users tended to contact NHS 24 less often for more problems compared to affluent users, exceptions were for throat problems, genitourinary, eye problems and fever.

**Triage advice and urgency:**

- Out-of-hours calls most frequently resulted in: advice to visit an out-of-hours centre (34.1%), a GP home visit (12.2%) or self-care advice being provided (10.2%). Whereas in-hours calls mainly resulted in: advice to contact a dentist (27.6%), a NHS 24 service clinician calling the patient (21.1%) or advice to contact a GP (19.2%).

**Zwaanswijk  
2015  
Netherlands**

895 253 patients

Digital triage within General practice cooperative (Nurse)

General population

**Triage advice and urgency:**

- Variation in urgency occurred at lowest two urgency levels: 4 and 5 ( 5 is self care).
- Urgency variation was symptom specific: For Cystitis/Urinary Infections: 93.4% of variation ascribed to variations in patient characteristics. For cystitis urgency was significantly lower for females and lower for adult patients; Lacerations and cuts: urgency significantly higher for patients over 5 years old than for younger children

**Njeru  
2017  
USA**

587 cases  
587 controls

MayoClinic proprietary (ExpertRN: software) (Nurse)

Adult callers with and without limited English proficiency (LEP)

**Triage advice and urgency:**

- Nurse recommendations for higher acuity care, (call an ambulance, visit the ED, or schedule an acute appointment) were more frequent for LEP callers than non-LEP callers (49.4% versus 39.0%; P < 0.0004), differences remained significant after adjustment for co-morbidities
- The LEP patients were less likely to follow the recommendations given

by the nurse, n (%): 339 (60.9%) versus 379 (69.4%) - even after adjusting for sex, Charlson co-morbidity index(CCI), caller type (self or surrogate), duration of call, and recommended action

|                                     |                                                                          |                           |                                              |                                                                                                                                                                                                                                                                                                                                                                                                                                                                                                                                                                                                                                                                                                                                                                                                                                        |
|-------------------------------------|--------------------------------------------------------------------------|---------------------------|----------------------------------------------|----------------------------------------------------------------------------------------------------------------------------------------------------------------------------------------------------------------------------------------------------------------------------------------------------------------------------------------------------------------------------------------------------------------------------------------------------------------------------------------------------------------------------------------------------------------------------------------------------------------------------------------------------------------------------------------------------------------------------------------------------------------------------------------------------------------------------------------|
| <b>Jacome<br/>2018<br/>Portugal</b> | 148,099 calls                                                            | Linha Saude 24<br>(Nurse) | General population<br>(Older age groups 65+) | <p><b>Patient/symptom characteristics:</b></p> <ul style="list-style-type: none"> <li>Majority of users female (63% vs. 37%), most users younger than 80 years old (60.6% vs. 39.4%). Mean age: 77.3,</li> <li>Most common symptoms: pain (18.1%), respiratory tract infections(11.9%), digestive problems (8.6%), diabetes mellitus (6.4%), calls re one of these symptoms (51.3%). Urogenital disorder symptoms more frequently reported by men, 9.8% vs. 4.3%.</li> </ul> <p><b>Triage urgency and advice</b></p> <p>Users in the “oldest old” group were more often referred to an A&amp;E (51% vs. 40% of those in the “65–79 age” group) and less advised to rely on self-care (11% of the “oldest old” vs. 15% of the elders younger than 80).</p>                                                                              |
| <b>Hsu<br/>2011<br/>England</b>     | 402,959 calls<br>about older<br>people (In 12-<br>month study<br>period) | NHS Direct<br>(Nurse)     | Older age groups (aged<br>over 65 years)     | <p><b>Patient/Symptom characteristics</b></p> <ul style="list-style-type: none"> <li>The age of the subject of the calls ranged from 65 to 109 years (mean = 76.78; median = 76; Standard Deviation =7.856; mode = 65).During the study period, the estimated proportion of people aged 65 years and over was approximately 16% of the England and Wales population [9], but accounts for only 7.2% of service use .</li> <li>Older people use the service mainly for actual symptoms, usually with some level of urgency. Amongst older adults, service use increased with age, with a higher use among women than men</li> </ul> <p><b>Triage advice and urgency</b></p> <p>Overall, the largest category was the person being advised to see their GP, PCS or dentist on the same day (n = 112,778, 28%), followed by home care</p> |



(n = 102,406, 25.4%) and being advised to see their GP, PCS or dentist, either routinely (n = 61,419, 15.2%) or urgently (n = 59,154, 14.7%). The volume of calls being referred to 999 (n = 27,612, 6.9%), A&E (n = 21,650, 5.4%) and community services (n = 7,931, 2%) was relatively small.

|                                  |                  |                           |                                                    |                                                                                                                                                                                                                                                                                                                                                                                                                                                                                                                                                                                                                                                                                                                                                                                                                                                                                                                                                                                                                                                                                                                                                                                                                                                                                                                                                                                                                                                                                                                                                                                                                                                                                                                                                               |
|----------------------------------|------------------|---------------------------|----------------------------------------------------|---------------------------------------------------------------------------------------------------------------------------------------------------------------------------------------------------------------------------------------------------------------------------------------------------------------------------------------------------------------------------------------------------------------------------------------------------------------------------------------------------------------------------------------------------------------------------------------------------------------------------------------------------------------------------------------------------------------------------------------------------------------------------------------------------------------------------------------------------------------------------------------------------------------------------------------------------------------------------------------------------------------------------------------------------------------------------------------------------------------------------------------------------------------------------------------------------------------------------------------------------------------------------------------------------------------------------------------------------------------------------------------------------------------------------------------------------------------------------------------------------------------------------------------------------------------------------------------------------------------------------------------------------------------------------------------------------------------------------------------------------------------|
| <b>Cook<br/>2013<br/>England</b> | Calls: N=358 503 | NHS Direct<br><br>(Nurse) | children aged 0–15<br>(<1, 1–3 and 4–15<br>years)) | <p><b>Patient and symptom characteristics</b></p> <ul style="list-style-type: none"> <li>• For infants aged &lt;1, highest call rates(CR) were found for ‘crying’: male (n=14, 440, CR=13.61) and female (n=13 654, CR=13.46) babies</li> <li>• High CRs were also found for symptoms relating to ‘skin/hair/ nails’ and ‘colds/flu/sickness’ for all age groups: NHS Direct was able to support patients to self-manage and provide health information for these symptoms for 59.7% and 51.4% of all cases respectively.</li> </ul> <p><b>Triage advice and urgency</b></p> <ul style="list-style-type: none"> <li>•The highest percentage of calls across all age groups were given health information and/or self-care advice, suggesting that a combined 47% of all calls made on behalf of children aged &lt;1, 48.7% of calls on behalf of children 1–3 and 43.9% of all calls made by or on behalf of children aged 4–15 were managed with no onward referral needed. NHS Direct supported callers to self-manage their symptoms by giving health information, this included for: ‘poisoning and overdose’ , ‘skin/hair/nail’ , ‘wounds and injuries’ and ‘colds and flu/sickness’</li> <li>•For children aged &lt;1, only 7% of calls were forwarded to A&amp;E, which was markedly higher for children aged 1–3 (12.3%) and for children aged 4–15 (13.5%). However, for GP outcomes (urgent/same day/routine), this was higher for children aged &lt;1 (30%) than for children aged 1–3 (24.5%) and 4–15 (23.5%)</li> <li>•The symptoms which contributed to the highest number of high urgency calls related to ‘respiratory tract’ (n=840, 5.1%, ASR=32.7) and ‘neurological disorders’ (n=51, 8.4%, ASR=12.1) with the highest number</li> </ul> |
|----------------------------------|------------------|---------------------------|----------------------------------------------------|---------------------------------------------------------------------------------------------------------------------------------------------------------------------------------------------------------------------------------------------------------------------------------------------------------------------------------------------------------------------------------------------------------------------------------------------------------------------------------------------------------------------------------------------------------------------------------------------------------------------------------------------------------------------------------------------------------------------------------------------------------------------------------------------------------------------------------------------------------------------------------------------------------------------------------------------------------------------------------------------------------------------------------------------------------------------------------------------------------------------------------------------------------------------------------------------------------------------------------------------------------------------------------------------------------------------------------------------------------------------------------------------------------------------------------------------------------------------------------------------------------------------------------------------------------------------------------------------------------------------------------------------------------------------------------------------------------------------------------------------------------------|

of outcomes being referral to the Emergency services( England's 999 service).

|                               |                                                                 |                                          |                                                                                       |                                                                                                                                                                                                                                                                                                                                                                                                                                                                                                                                                                                                                                                                                                                                                                                                                                                                                                                                                                                                                                                                                                                                                                                                                                                                                                                                                                                                                                                                                                                                                                                                                                                                |
|-------------------------------|-----------------------------------------------------------------|------------------------------------------|---------------------------------------------------------------------------------------|----------------------------------------------------------------------------------------------------------------------------------------------------------------------------------------------------------------------------------------------------------------------------------------------------------------------------------------------------------------------------------------------------------------------------------------------------------------------------------------------------------------------------------------------------------------------------------------------------------------------------------------------------------------------------------------------------------------------------------------------------------------------------------------------------------------------------------------------------------------------------------------------------------------------------------------------------------------------------------------------------------------------------------------------------------------------------------------------------------------------------------------------------------------------------------------------------------------------------------------------------------------------------------------------------------------------------------------------------------------------------------------------------------------------------------------------------------------------------------------------------------------------------------------------------------------------------------------------------------------------------------------------------------------|
| <b>North<br/>2010<br/>USA</b> | 20,230 calls to<br>Ask Mayo Clinic<br>(over a 2 year<br>period) | Ask Mayo Clinic<br>(ExpertRN)<br>(Nurse) | General population<br>(those with insurance<br>and access to AskMayo<br>subscription) | <b>Patient characteristics (seriousness of symptoms as investigated through hospitalisation rates).</b><br><br>This study compared hospitalisation rates in 3 groups: digital triage, office visit, ED visit:<br><ul style="list-style-type: none"> <li>•Telephone triage calls are more likely to result in hospitalisation than office visit; but less likely than ED visit. Odds of hospitalisation were 20 times greater than office visit. Odds of hospitalisation 3 - 5 greater in ED compared to AMC. Odds of hospitalisation increased with age. AMC calls had more similarities to ED visits than outpatient visits.</li> <li>•AMC calls: 547 (3%) of callers were hospitalised. Hospitalisation rate varied by age: low of 2% for ages 3 - 17/ High of 10% for 65+</li> <li>•ED visits: hospitalisation from 4% (ages 3 – 17) to 35% for 65+; similar age trends across AMC and ED. Office visits: hospitalisation from 0.3% for all age groups, except 3 - 17 where it was 0.1%</li> <li>•Hospitalisation following call occurred quickly: 77% occurred with 48 hours</li> <li>•Those aged 65 years + were 5 times more likely to have problems requiring hospital admission when presenting to the ED compared to callers.</li> <li>•Symptom calls in the 65 years and older age group had hospitalization rates close to 10%,</li> <li>•Findings relating to symptoms: for adult abdominal pain, rates of hospitalisation between AMC and ED similar; opposite for diarrhoea: odds ratio was 19 for hospitalisation following ED compared to triage call</li> <li>•More female callers compared to female ED attendees (72% of callers</li> </ul> |
|-------------------------------|-----------------------------------------------------------------|------------------------------------------|---------------------------------------------------------------------------------------|----------------------------------------------------------------------------------------------------------------------------------------------------------------------------------------------------------------------------------------------------------------------------------------------------------------------------------------------------------------------------------------------------------------------------------------------------------------------------------------------------------------------------------------------------------------------------------------------------------------------------------------------------------------------------------------------------------------------------------------------------------------------------------------------------------------------------------------------------------------------------------------------------------------------------------------------------------------------------------------------------------------------------------------------------------------------------------------------------------------------------------------------------------------------------------------------------------------------------------------------------------------------------------------------------------------------------------------------------------------------------------------------------------------------------------------------------------------------------------------------------------------------------------------------------------------------------------------------------------------------------------------------------------------|

but 61% of office visits and 56% of ED visits)

|                               |                                                        |                                                                        |                    |                                                                                                                                                                                                                                                                                                                                                                                                                                                                                                                                                                                                                                                                                                                                                                                                                                                                                                                                                                                                                                                                                                                                                                                                                                                                                                                                                                                                                                                                                                                                                                                                                                                                                                                                                                                                                                                      |
|-------------------------------|--------------------------------------------------------|------------------------------------------------------------------------|--------------------|------------------------------------------------------------------------------------------------------------------------------------------------------------------------------------------------------------------------------------------------------------------------------------------------------------------------------------------------------------------------------------------------------------------------------------------------------------------------------------------------------------------------------------------------------------------------------------------------------------------------------------------------------------------------------------------------------------------------------------------------------------------------------------------------------------------------------------------------------------------------------------------------------------------------------------------------------------------------------------------------------------------------------------------------------------------------------------------------------------------------------------------------------------------------------------------------------------------------------------------------------------------------------------------------------------------------------------------------------------------------------------------------------------------------------------------------------------------------------------------------------------------------------------------------------------------------------------------------------------------------------------------------------------------------------------------------------------------------------------------------------------------------------------------------------------------------------------------------------|
| <b>North<br/>2010<br/>USA</b> | 163,608<br>symptom calls<br>made to the AMC<br>centre. | MayoClinic<br>(Triage tool:<br>ExpertRN: a<br>software)<br><br>(Nurse) | General population | <p><b>Patient/symptom characteristics</b></p> <ul style="list-style-type: none"> <li>• 163,608 symptom calls made in 3 year study period. Adult calls accounted for 105,866 (65%) of the total calls, of these, 14,646 (14%) were made by surrogate (by someone on behalf of a patient); men and the elderly were the two most over-represented groups in surrogate calls</li> <li>• For surrogate calls with available data: the caller was a spouse in 4844 (49%), a parent or child in 3029 (31%), or a friend in 1187 (12%) of the calls. This varied by age.</li> <li>• In surrogate calls the top 5 symptoms were: Abdominal pain, vomiting or nausea, other, skin problems, dizziness. In self calls: abdominal pain, skin problems, chest pain, other, eye or vision problems.</li> <li>• Vomiting or nausea, dizziness or light-headedness, and other were significantly more likely to be reported by surrogate callers. Abdominal pain, skin problems, chest pain, and eye or vision problems were significantly more likely to be reported by self callers</li> <li>• Surrogate calls, as a percent of total calls by age group, increased with the age of the patient from 12% in the 18–34 year age group to 43% in the 80 and over age group.</li> <li>• Over half the calls (51%) for males 80 years and over were from surrogates while over one third of calls (39%) regarding women 80 and over were made by surrogates; males aged 35 to 80 years were the subject of about 60% of the surrogate calls.</li> <li>• Calls concerning women patients were 74,069 (70%) of all adult calls, of which 6780 (9%) were made by surrogates. Of the 31,797 calls about male patients, 7866 (25%) were made by surrogates. Overall, males were the subject of 54% of surrogate calls and 26% of self calls (OR 3.3; 95% CI 3.2</li> </ul> |
|-------------------------------|--------------------------------------------------------|------------------------------------------------------------------------|--------------------|------------------------------------------------------------------------------------------------------------------------------------------------------------------------------------------------------------------------------------------------------------------------------------------------------------------------------------------------------------------------------------------------------------------------------------------------------------------------------------------------------------------------------------------------------------------------------------------------------------------------------------------------------------------------------------------------------------------------------------------------------------------------------------------------------------------------------------------------------------------------------------------------------------------------------------------------------------------------------------------------------------------------------------------------------------------------------------------------------------------------------------------------------------------------------------------------------------------------------------------------------------------------------------------------------------------------------------------------------------------------------------------------------------------------------------------------------------------------------------------------------------------------------------------------------------------------------------------------------------------------------------------------------------------------------------------------------------------------------------------------------------------------------------------------------------------------------------------------------|

to 3.4).

#### **Triage advice and urgency**

- Emergency disposition was advised by the nurse in 29,371 (28%) of all calls. A total of 5545 (38%) of surrogate calls ended with this nurse recommendation compared with only 23,826 (26%) of self calls (OR 1.72; 95% CI 1.66 to 1.79).
- The proportion of emergency nurse disposition compared with routine disposition increased with age for both surrogates and self calls (P: 0.0001).

peer review only

1  
2  
3 1  
45 2 *Characteristics of patients and callers*  
6 3

7  
8 4 Presenting symptoms with highest frequency amongst callers, included: abdominal or digestive  
9  
10 5 problems, 6.8% - 12.2% of calls(5, 17, 20, 22, 37); and respiratory problems, 11.3%(37) to 11.9%(22),  
11  
12 6 of calls. The majority of calls were made by women (range: 59%-72%)(5, 17, 20-22, 37).

13  
14  
15  
16 7 Calls about younger age groups(20, 21) made up a comparatively high proportions of calls; 24% of  
17  
18 8 calls were for 0 – 5 year olds in one study(21) and another reported 15% of out of hours calls being  
19  
20 9 for 0-4 year olds(5).  
21  
22

23  
24 10 *User characteristics and triage advice urgency*  
25 11

26  
27 12 Factors associated with triage advice urgency included:  
28  
29

30 13 1) Patient's age: two studies reported urgency to be lower in children and younger age groups(21)  
31  
32 14 (18); one study reported a high proportion (47%) of calls about children aged (0 – 15) were resolved  
33  
34 15 through self-care advice or health information(18). Two studies reported that urgency increased  
35  
36 16 with age(17, 22).  
37  
38

39  
40 17 2) Sex: two studies reported women were more likely to receive lower urgency advice as compared  
41  
42 18 to men; however, neither controlled for age or presenting symptoms(19, 21), one suggested this  
43  
44 19 may be explained by women seeking care advice earlier, before their symptoms progress and  
45  
46 20 become more urgent(19).  
47  
48

49  
50 21 3) Symptoms: two studies reported symptoms associated with higher urgency advice(18, 23); for  
51  
52 22 example, calls about children with respiratory problems were more likely to be referred to  
53  
54 23 emergency care as compared to other symptom types(18).  
55  
56

57 24 4) Caller language proficiency: one case-control study reported that adults with limited English  
58  
59 25 language proficiency (LEP) were more likely to receive higher urgency advice (ambulance, immediate  
60

26

1  
2  
3 1 ED attendance or urgent visit) (49.4% versus 39.0%;  $P < 0.0004$ )(7); groups in this study were  
4  
5 2 balanced based on age and sex and co-morbidities were controlled for(7).  
6  
7  
8  
9 3

## 10 4

### 11 5 **Service use and clinical outcomes following triage**

#### 12 6

#### 13 7 *Change in service use following digital triage implementation*

#### 14 8

15 9 Eight studies reported on change in wider health care service use (primary care, ED use, ambulance  
16 10 use, and emergency admissions) following implementation of digital triage(26-28, 30, 33, 34, 36, 45).  
17 11 Of these, one investigated non-clinician led triage(36). Comparators included: rates of service use in  
18 12 patients receiving usual care (e.g. GP referral) in comparison to those who were digitally triaged(30,  
19 13 34); service use rates prior to implementation(26, 28, 33, 45); comparator regions with no digital  
20 14 triage implementation(27, 36); and national service use comparator(28).

21 15 Most reported reduction or no change in wider service use after implementation; there were two  
22 16 exceptions, which both evaluated clinician (nurse) led digital triage: one (rated as being a lower  
23 17 quality study) reported an increase in ED use(45). The other reported some increase in out of hours  
24 18 service use (GP clinic use and home visits) related to 'standalone' digital triage call centres in  
25 19 comparison to national comparator; however, this study differed to the other studies as it utilised  
26 20 household surveys to capture service use(28).

27 21 Table 3 shows summarized findings.  
28  
29  
30  
31  
32  
33  
34  
35  
36  
37  
38  
39  
40  
41  
42  
43  
44  
45  
46  
47  
48  
49  
50  
51  
52 22  
53  
54  
55  
56  
57  
58  
59  
60

1 **Table 3: Change in wider healthcare service use following digital triage implementations (8 studies)**

2

| First author<br>Year<br>Country | Study type                                    | Sample / data size                                                                                                 | Digital triage service/tool name (staff type)                           | Participants       | Comparator                                | Findings relating to change in wider health care service use (primary care, hospitalisations, ambulance services, ED attendance)                                                                                                                                                                                                                                                                                                                                                                                                                                              |
|---------------------------------|-----------------------------------------------|--------------------------------------------------------------------------------------------------------------------|-------------------------------------------------------------------------|--------------------|-------------------------------------------|-------------------------------------------------------------------------------------------------------------------------------------------------------------------------------------------------------------------------------------------------------------------------------------------------------------------------------------------------------------------------------------------------------------------------------------------------------------------------------------------------------------------------------------------------------------------------------|
| Lattimer<br>2000<br>England     | Cost effectiveness report of controlled trial | >14000<br>Control group (n = 7308 calls)<br>Intervention group (Nurse telephone consultation):(n =7184 calls)      | Digital triage integrated within a general practice cooperative (Nurse) | General population | Usual care (referral to a GP)             | <b>Primary care:</b> During intervention period GPs made 428 fewer home visits, generating savings of £3360 (£2578 to £4198) in a year.<br><b>Hospitalisations:</b> The cost of providing nurse telephone consultation was £81 237 per annum; cost savings were estimated to be £94 422 due to reduction of other costs for the NHS arising from reduced emergency admissions to hospital.                                                                                                                                                                                    |
| Munro<br>2000<br>England        | Routine data analysis                         | Study corresponds to the 1st year of operation:<br><br>68 500 NHS direct calls from the 1.3 million people served. | NHS Direct (Nurse)                                                      | General population | Service use in regions with no NHS direct | <b>Primary care:</b> There was a significant decrease in use of GP cooperatives at NHS direct sites: change in estimated trend from increase of 2.0% per month before to – 0.8% afterwards (estimated relative change – 2.9% (95% confidence interval – 4.2% to – 1.5%)). compared to negligible change in control: from 0.8% a month before to 0.9% afterwards (relative change 0.1% ( – 0.9% to 1.1%))<br><b>Ambulance services:</b> Changes in trends were small and non-significant<br><b>ED attendances:</b> Changes in trends were small, variable and not significant. |

|                            |                                                                 |                                                                                        |                                                                                                    |                                                                  |                                                                                       |                                                                                                                                                                                                                                                                                                                                                                                                                                                                                                                                                                                                                                                                                                         |
|----------------------------|-----------------------------------------------------------------|----------------------------------------------------------------------------------------|----------------------------------------------------------------------------------------------------|------------------------------------------------------------------|---------------------------------------------------------------------------------------|---------------------------------------------------------------------------------------------------------------------------------------------------------------------------------------------------------------------------------------------------------------------------------------------------------------------------------------------------------------------------------------------------------------------------------------------------------------------------------------------------------------------------------------------------------------------------------------------------------------------------------------------------------------------------------------------------------|
| <b>Dale 2003 England</b>   | Controlled trial                                                | 635 calls digitally triaged by ambulance service; 611 non-triaged calls                | Digital triage within an emergency service (Nurse and paramedic)                                   | Callers to emergency service for non-emergency concern (aged 2+) | Usual care (ambulance dispatch)                                                       | <p><b>Ambulance services:</b> 52% (n=330) of calls were triaged as not requiring emergency ambulance. Of these: 47% had moderate urgency: care needed within 24 hours; 26% needed a routine appointment; 27% self care sufficient. Overall, 9.8% of ambulances were cancelled in the intervention groups (where this was offered).</p> <p><b>ED attendances:</b> In the intervention group: 81% of patients triaged as requiring ambulance call outs attended ED; 63.4% of patients triaged as not requiring ambulance attended ED.</p> <p><b>Hospitalisations:</b> Some inconsistency in triage: 10% of those triaged as not requiring ambulance dispatch subsequently required hospital admission</p> |
| <b>Mark 2003 England</b>   | Mixed methods (routine data analysis + observation, interviews) | Numbers of calls analysed across three years: 5126 (year 1998) 5702 (1999) 4698 (2000) | Pilot digital triage system within GP cooperative (Harmoni), which later became NHS Direct (Nurse) | General population                                               | Service use before implementation                                                     | <p><b>Primary care:</b> Two main 'transitions': 1. Initial increase in GP cooperative workload and in-hours calls. Followed by fall in OOH GP co-operative (Harmoni) workload by 18%. Use of primary care centres declined following the arrival of NHS Direct; allocation of home visits initially increased then decreased; OOH doctor advice progressively increased. Within older age groups: decline in both use of primary care centres and home visits, but a rise in doctor advice.</p> <p><b>ED attendances:</b> Progressive increase in ED attendance</p>                                                                                                                                     |
| <b>Dunt 2005 Australia</b> | Four controlled trials                                          | Random sampling (350 households per trial site)                                        | Two "standalone" call centres using digital triage telephone ("call centre software")              | General population                                               | <p>1. Service use before implementation</p> <p>2. Implementation of two telephone</p> | <p><b>Primary care:</b> Some types of After Hours Primary Medical Care became more frequent in both digital triage services: Call centre: state-wide: Service use overall (95%CI: 1.03–1.83) and GP clinic use (95%CI: 1.07–2.00) increased in the metro area; and increase in GP clinic (95%CI: 1.04–2.14) and home visits (95%CI: 1.03–3.91) in the non-metro area</p> <p><b>Ambulance services:</b> Overall no change in any site</p>                                                                                                                                                                                                                                                                |



|                                    |                                                 |                                                                                                                                   |                                                                                 |                    |                                                                              |                                                                                                                                                                                                                                                                                                                                                                                                                                                                                                                                                                                                                                                                                                  |
|------------------------------------|-------------------------------------------------|-----------------------------------------------------------------------------------------------------------------------------------|---------------------------------------------------------------------------------|--------------------|------------------------------------------------------------------------------|--------------------------------------------------------------------------------------------------------------------------------------------------------------------------------------------------------------------------------------------------------------------------------------------------------------------------------------------------------------------------------------------------------------------------------------------------------------------------------------------------------------------------------------------------------------------------------------------------------------------------------------------------------------------------------------------------|
|                                    |                                                 |                                                                                                                                   | (Nurse)                                                                         |                    | triage sites within existing 'embedded services' using paper based protocols |                                                                                                                                                                                                                                                                                                                                                                                                                                                                                                                                                                                                                                                                                                  |
| <b>Munro 2005 England</b>          | Surveys with care providers                     | 571 surveys sent (188/297) responses from GP cooperatives, (35/35) for ambulance services and (200/239) for emergency departments | NHS Direct (Nurse)                                                              | General population | Service use before implementation                                            | <p><b>Primary care:</b> In first 3 years of operation, NHS Direct was associated with a reduction in calls to OOH general practice. In the context of an underlying trend of demand rising by about 1% each year, the introduction of NHS Direct was associated with an immediate 3% fall in demand coupled with a reversal of the trend so that demand began to fall by almost 8% per year</p> <p><b>Ambulance services:</b> No significant change in emergency ambulance service use.</p> <p><b>ED attendances:</b> NHS Direct was associated with negligible change emergency departments, and no different effect was found for the four paediatric emergency departments in the dataset</p> |
| <b>Morimura 2010 Japan (Tokyo)</b> | Routine data analysis (+ surveys with patients) | 26,138 telephone consultations                                                                                                    | Tokyo Emergency Telephone Consultation Centre: (#7119) (nurse and non-clinical) | General population | Service before implementation,                                               | <p><b>Ambulance services:</b> Number of ambulances used per 1 million was statistically reduced compared with that of the previous year: 46 846 vs. 44 689, <math>p &lt; 0.0001</math>. The after-hours ambulance use per 1 million people was also significantly reduced: 31 965 vs. 30 370.</p> <p><b>Hospitalisations:</b> In those who were referred to a hospital by an ambulance (<math>n = 3252</math>) 30.8% (1000 cases) were hospitalised. The emergency hospitalisation rate (EHR) decreased annually before the introduction of the #7119 centre. However, the rate after its</p>                                                                                                    |

1  
2  
3  
4  
5  
6  
7  
8  
9  
10  
11  
12  
13  
14  
15  
16  
17  
18  
19  
20  
21  
22  
23  
24  
25  
26  
27  
28  
29  
30  
31  
32  
33  
34  
35  
36  
37  
38  
39  
40  
41  
42  
43  
44  
45  
46

|                            |                       |                                                               |                                                         |                    |                                                                                   |                                                                                                                                                                                                                                                                                                                                                                                                                                                                                                                                                               |
|----------------------------|-----------------------|---------------------------------------------------------------|---------------------------------------------------------|--------------------|-----------------------------------------------------------------------------------|---------------------------------------------------------------------------------------------------------------------------------------------------------------------------------------------------------------------------------------------------------------------------------------------------------------------------------------------------------------------------------------------------------------------------------------------------------------------------------------------------------------------------------------------------------------|
|                            |                       |                                                               | call handler)                                           |                    |                                                                                   | introduction was statistically higher 36.5% vs. 37.8%, p<0.0001)(EHR increased following the introduction of the service). The after-hours EHR of ambulance cases for all cases and for adults was also higher after the introduction of the #7119 centre (A) than those of (B1) (all cases: 29.4% vs. 29.9%, p<0.0001                                                                                                                                                                                                                                        |
| <b>Turner 2013 England</b> | Routine data analysis | 400,000 calls to NHS 111 in first year of operation analysed. | Four sites using NHS 111 (NHS Pathways) (Non-clinician) | General population | Control sites (not using NHS 111) selected to match equivalent geographical areas | <p><b>Primary care:</b> In one site - statistically significant reduction in urgent care attendances; 3 sites: reduction in calls to NHS Direct. Overall no change in primary care could be attributed to NHS111.</p> <p><b>Ambulance services:</b> Reduction in ambulance emergency calls in 1 site and an increase in another site; All sites showed increase in emergency ambulance incidents. Overall no change in emergency service (999) calls attributable to NHS111</p> <p><b>ED attendances:</b> Overall no change could be attributed to NHS111</p> |

1

### *Patient level service use and adherence with advice*

Seven studies reported varying patient adherence to triage advice through evaluation of patients' subsequent ED attendance(24, 25, 29, 32, 35, 37). Four utilised routine data and data linkage with sample sizes ranging from: 3312 to 13,019 triage calls. Of these, three studies reported 60% - 70% of patients who were advised to attend ED followed this advice(25, 32, 35); one reported a range of 29% – 69%, with higher compliance when ambulance was advised (53-69%) and lowest compliance when self-transport to ED was recommended (29%)(35).

One small survey of 268 callers reported high levels of adherence with advice to attend ED (96%; 49 of 51 calls), to contact a GP (92%; 133 of 144) and to self care (93%; 64 of 69)(24).

Four studies reported proportions of patients who attended ED after receiving triage advice: 2.4%(25), 9%(32, 35) and 22%(29). The latter included 51 of 1150 parents who had remained worried after calling the digital triage service(29). Results are summarised in table 4.

1 **Table 4: Studies investigating patient level outcomes: service use, adherence with advice and hospitalisations (6 studies)**

| First author<br>Year<br>Country     | Study design                         | Sample / data size                                                               | Name of service (staff conducting digital triage) | Participants       | Comparison groups used in analyses                                                                                                                                                      | Key patient level service use findings                                                                                                                                                                                                                                                                                                                                                                                                                                                                                                                                                                                                                                                                                                                                                  |
|-------------------------------------|--------------------------------------|----------------------------------------------------------------------------------|---------------------------------------------------|--------------------|-----------------------------------------------------------------------------------------------------------------------------------------------------------------------------------------|-----------------------------------------------------------------------------------------------------------------------------------------------------------------------------------------------------------------------------------------------------------------------------------------------------------------------------------------------------------------------------------------------------------------------------------------------------------------------------------------------------------------------------------------------------------------------------------------------------------------------------------------------------------------------------------------------------------------------------------------------------------------------------------------|
| <b>Foster 2003<br/>England</b>      | Routine data analysis & data linkage | 4493 calls, of which 193 were advised to go to ED                                | NHS Direct (Nurse)                                | General population | Three comparison groups:<br>1) Callers triaged to ED who attended ED<br>2) Callers triaged to ED, who did not attend<br>3) Callers who received different triage advice who attended ED | <ul style="list-style-type: none"> <li>• Of 4493 calls to NHS Direct, 8% (n=358) were advised to attend A&amp;E. In those advised to attend ED where data was available 64.2% (124 of 193) followed the advice to visit ED with the same presenting complaint.</li> <li>• 2.4%: (99 of 4135) went to ED for the same presenting complaint as their contact with NHS Direct despite being given other advice.</li> <li>• <b>Hospitalisations:</b> Most (66.9%: 83 of 124) of those attending ED after being advised to were sent home without further referral. However, 10 were referred on within the hospital and seven were admitted. 15 callers (0.3%) who were not advised to attend A&amp;E and were subsequently admitted raise concerns about the quality of triage.</li> </ul> |
| <b>Sprivulis 2004<br/>Australia</b> | Routine data analysis & data linkage | 13,019 presentations to ED (842 had contacted HealthDirect in previous 24 hours) | HealthDirect (Nurse)                              | General population | Those who were digitally triaged prior to attending ED and those who were not.<br>Also investigated: Patients triaged to immediate or prompt care -(Visit                               | <ul style="list-style-type: none"> <li>• 13 019 presentations to ED of which 842 (6.5%) had contacted HealthDirect (HD) in 24 hours prior to attendance.</li> <li>• Percentages of patients who complied with recommended advice: HD triage to Immediate or prompt care: 61% (963/1579) / HD triage to non urgent 91% (2204/2416)</li> <li>• <b>Hospitalisations:</b> For those triaged to 'Immediate/prompt care' and 'non-urgent' care by HD and who presented to the ED (in the latter group, against the advice), there was a similar hospital admissions rate</li> </ul>                                                                                                                                                                                                           |

ED) vs. and ED triage distribution.  
 patients triaged to  
 non-urgent care  
 (any non-  
 emergency  
 dispositions)

|                                     |                                 |                                                                                                                                             |                    |                                         |                                                                                                                                                                                                                                                                                           |                                                                                                                                                                                                                                                                                                                                                                                                                                                                                                                                                                                                                                                                                                                                                                                                                                                                                                                                                                                                                                                                                             |
|-------------------------------------|---------------------------------|---------------------------------------------------------------------------------------------------------------------------------------------|--------------------|-----------------------------------------|-------------------------------------------------------------------------------------------------------------------------------------------------------------------------------------------------------------------------------------------------------------------------------------------|---------------------------------------------------------------------------------------------------------------------------------------------------------------------------------------------------------------------------------------------------------------------------------------------------------------------------------------------------------------------------------------------------------------------------------------------------------------------------------------------------------------------------------------------------------------------------------------------------------------------------------------------------------------------------------------------------------------------------------------------------------------------------------------------------------------------------------------------------------------------------------------------------------------------------------------------------------------------------------------------------------------------------------------------------------------------------------------------|
| <b>Stewart<br/>2006<br/>England</b> | Routine data analysis & linkage | 3312 calls to NHS Direct North West Coast, and 14,029 patients who attended ED ( between the 1st of December 2002and 28th of February 2003) | NHS Direct (Nurse) | Children and young adults aged under 16 | 2 matched patient groups: 1) NHSD callers: those advised by NHSD to attend A&E in the last 12 hours (n = 299)<br>2) NHSD-other: those given a different triage advice, but who still attended ED (n=163)<br>Additional groups: Those attending ED who were GP referred and self-referred. | <ul style="list-style-type: none"> <li>•88% of those advised by NHS Direct (NHSD) to attend A&amp;E did so within 1 hour.</li> <li>• 88% of those advised to take another course of action attended A&amp;E within 4 hours. The age distribution of patients attending A&amp;E and those that called NHSD were generally similar. In both groups the majority of contacts were children under the age of 5 (20% were less than one year old).</li> <li>• The only significant difference in triage category was found to be in the green category (the A&amp;E department uses the Manchester triage group 5 point system) where NHSD referred significantly less than self referrals.</li> <li>•74% of NHSD patients were discharged home compared to 56% of those referred by GPs and 64% of those who self referred.</li> <li>• <b>Hospitalisations:</b> 27% of GP referrals admitted, 10% of the self-referral group and 15% of NHS Direct referrals. Of those admitted patients referred by NHS Direct 52% were advised to attend A&amp;E, and 48% were given other advice.</li> </ul> |
| <b>Byrne<br/>2007<br/>England</b>   | Surveys                         | 268 callers                                                                                                                                 | NHS Direct (Nurse) | Calls about abdominal pain, cough       | None                                                                                                                                                                                                                                                                                      | Of 268 callers to NHS Direct, 69 (26%) were advised to self-care, 144 callers (54%) were advised to contact a GP, 51 (19%) were referred to an A&E department and four (1%) were referred to another service.                                                                                                                                                                                                                                                                                                                                                                                                                                                                                                                                                                                                                                                                                                                                                                                                                                                                               |

|                                |                                 |                                                        |                                                                                     |                     |                                                                                                                                                                                             |                                                                                                                                                                                                                                                                                                                                                                                                                                                                                                                                                                                                                                                                                                                         |
|--------------------------------|---------------------------------|--------------------------------------------------------|-------------------------------------------------------------------------------------|---------------------|---------------------------------------------------------------------------------------------------------------------------------------------------------------------------------------------|-------------------------------------------------------------------------------------------------------------------------------------------------------------------------------------------------------------------------------------------------------------------------------------------------------------------------------------------------------------------------------------------------------------------------------------------------------------------------------------------------------------------------------------------------------------------------------------------------------------------------------------------------------------------------------------------------------------------------|
|                                |                                 |                                                        |                                                                                     | or sore throat      |                                                                                                                                                                                             | Among the 69 callers advised to self-care, 64 (93%) reported that they had followed the advice to look after themselves at home, while five (7%) reported that they had chosen not to do so. Of the five, three said they had decided to go to their GP because, despite the advice of NHS Direct, they thought the condition was sufficiently severe to require such a visit. A further two said that their condition deteriorated in the time after their call to NHS Direct, so they then decided to contact their GP                                                                                                                                                                                                |
| <b>Siddiqui 2019 Australia</b> | Routine data analysis & linkage | 12,741 triaged cases linked to 72.577 ED presentations | Referred to as telephone triage advice (TTAS) (Nurse)                               | General population  | n/a                                                                                                                                                                                         | Compliance with ED attendance advice was between 29-69% with higher compliance if ambulance was advised (53-69%) and lowest compliance when self-transport to ED was recommended (29%). Appropriateness of attendance to ED for those using TTAC was comparable to those who hadn't been triaged by TTAC. <ul style="list-style-type: none"> <li>• 4% of ED presentations for year 2016-2017 had contacted the digital triage service</li> </ul>                                                                                                                                                                                                                                                                        |
| <b>Turbitt 2015 Australia</b>  | Surveys                         | 1150 parents attending ED (decline rate 19.9%)         | Victorian nurse-On-Call (NOC) (similar to Australia's HealthDirect service) (Nurse) | Parents of children | Some comparisons between parents who called and did not call but not clear 'There were no statistically significant differences among parents based on their demographic characteristics or | Of 1150 participants: 20% n=230 of parents had tried to call NOC ahead of ED attendance for their child's lower urgency concern<br>Younger parents (under 30) more likely to call NOC than older parents (over 30): 24% vs.18%; p =0.04<br>More parents attending the ED at night had tried to call the NOC service compared with those presenting at other time bands (31% vs.17% during the day, 19% in the evening and 18% on the weekend)<br>85% of parents calling the NOC found it helpful<br>70% of ED users (of those triaged by NOC) came to the ED because they were told to by NOC; 22% of ED users (of those triaged by NOC) came because they were still worried after receiving different advice from NOC |

1  
2  
3  
4  
5  
6  
7  
8  
9  
10  
11  
12  
13  
14  
15  
16  
17  
18  
19  
20  
21  
22  
23  
24  
25  
26  
27  
28  
29  
30  
31  
32  
33  
34  
35  
36  
37  
38  
39  
40  
41  
42  
43  
44  
45  
46

---

time of ED visit.'

Of overall ED users: 16% of respondents had not heard of NOC; 53% were aware of NOC, but thought it would not be helpful  
A higher number of parents made a call to NOC if their child's chief complaint was illness, compared with parents whose children had injuries (25% vs. 10%; P < 0.001).

---

For peer review only

1  
2  
3  
4  
5  
6  
7  
8  
9

1  
2  
3 1  
4  
56 2 **Safety**7 3  
8

9 4 Four studies highlighted potential triage errors based on hospital admission rates(25, 32, 34, 35).

10 5 These mainly related to potential 'under-triage', where the advice was considered to be at too low a

11 6 level of urgency in relation to clinical need. However, these findings were peripheral to the main

12 7 aims of these studies(25, 32, 34, 35).

13 8 One study reported similar hospitalisation rates between patients attending ED who had been

14 9 directed to 'immediate or prompt' care and 'non-urgent' care (immediate or prompt: n=261, 38%,

15 10 95% CI 34–41 vs. non-urgent: n=56, 37%, 95% CI 30–44)(32). Another reported 15% (n=71) of

16 11 paediatric cases attending ED after being triaged were admitted; of these, 37 had been advised to

17 12 attend ED and 34 were given other lower urgency advice(35).

18 13 Another study reported 15% (15 of 99) of patients given lower urgency advice than ED attendance,

19 14 (such as urgent or routine GP appointment or self care), attended ED following their triage call and

20 15 were admitted(25). One study reported 9.2%(30 of 330) of patients triaged as not requiring

21 16 ambulance dispatch were subsequently admitted(25, 34).

22 17 One qualitative study described users reporting not having received appropriate triage advice for

23 18 symptoms which later turned out to be more serious(43).

24 19

25 20 **Service user experience**

26 21

27 22 Seven studies focussed on user experience and satisfaction(6, 38, 39, 41-44). See table 5 for

28 23 summary of findings.



1 **Table 5: Findings from studies that investigated user experience and satisfaction**

| Author<br>Year<br>Country                | Study type                                                                                                                        | Sample / data<br>size                                                                                 | Name<br>of<br>service<br>/ digital<br>triage<br>tool- if<br>applicab<br>le | Partici<br>pants<br>&<br>service<br>name | Key themes and example quotes                                                                                                                                                                                                                                                                                                                                                                                                                                                                                                                                                                                                                                                                                                                                                                                                                                                                                                                                                                                                                                                                                                                                                                                                                                                                                                                                                                                                                                                                                |
|------------------------------------------|-----------------------------------------------------------------------------------------------------------------------------------|-------------------------------------------------------------------------------------------------------|----------------------------------------------------------------------------|------------------------------------------|--------------------------------------------------------------------------------------------------------------------------------------------------------------------------------------------------------------------------------------------------------------------------------------------------------------------------------------------------------------------------------------------------------------------------------------------------------------------------------------------------------------------------------------------------------------------------------------------------------------------------------------------------------------------------------------------------------------------------------------------------------------------------------------------------------------------------------------------------------------------------------------------------------------------------------------------------------------------------------------------------------------------------------------------------------------------------------------------------------------------------------------------------------------------------------------------------------------------------------------------------------------------------------------------------------------------------------------------------------------------------------------------------------------------------------------------------------------------------------------------------------------|
| <b>Björkm<br/>an<br/>2018<br/>Sweden</b> | Descriptive<br>research<br>design using<br>information<br>from online<br>forums<br>using six<br>step<br>'netnograph<br>ic' method | 3 Swedish<br>online forums<br>were<br>purposively<br>sampled. Data<br>collected from<br>online forums | Swedish<br>Healthc<br>are<br>Direct<br>(Nurse)                             | Genera<br>l<br>populat<br>ion<br>(Users) | <p><b>General satisfaction/attitudes</b><br/>"Where we are, the healthcare advice line is great, I'd rather call them than my primary care center"</p> <p><b>Experience of call taker:</b> Patients expressed: doubts and mistrust on advice given and credibility of nurses. Feelings that nurses were not well competent/ qualified and relied on google: "And seriously, are they real nurses who take the calls at SHD? I almost think it sounds like they're googling every question they get."</p> <p><b>Safety:</b> Some concerns related to safety/ feelings that advice given was not appropriate, for example: nurse advised patient to stay at home for a condition that turn out to be serious, "When you're advised to take two paracetamols and go to bed. Not go into the ER. When I was feeling really bad, and called them and described my symptoms, that's the exact advice I was given. The situation ended with my husband more or less forcing me into the car and driving me to the hospital. By then, my lips were purple and I was having trouble keeping my balance. Once there, they found that both my lungs were filled with 100 s of small blood clots. "</p> <p><b>Assertiveness &amp; negotiation:</b> "If you need help and advice you can always call the healthcare advice line, if you think they're giving you the 'wrong' advice, tell them, and maybe you'll get better help"</p> <p><b>Service working together:</b> dissatisfaction where this does not happen:</p> |

"There's no point calling SHD. They send you to the ER where they yell at you for being stupid enough to listen to them. SHD is a big problem and seems to be at war with the ER"

|                                       |                              |                                                                                                                                                                        |                                                                         |                                                    |                                                                                                                                                                                                                                                                                                                                                                                                                                                                                                                                                                                                                                                                                                                                                                                                                                                                                                                                                  |
|---------------------------------------|------------------------------|------------------------------------------------------------------------------------------------------------------------------------------------------------------------|-------------------------------------------------------------------------|----------------------------------------------------|--------------------------------------------------------------------------------------------------------------------------------------------------------------------------------------------------------------------------------------------------------------------------------------------------------------------------------------------------------------------------------------------------------------------------------------------------------------------------------------------------------------------------------------------------------------------------------------------------------------------------------------------------------------------------------------------------------------------------------------------------------------------------------------------------------------------------------------------------------------------------------------------------------------------------------------------------|
| <p><b>O'Catha in 2014 England</b></p> | <p>Survey</p>                | <p>Survey sent to 1200 patients from each of the 4 pilot sites studied, 1769 responded and were included for analysis</p>                                              | <p>NHS 111 (triage tool: NHS pathway s) (Non-clinical call handler)</p> | <p>General population (users)</p>                  | <p><b>General satisfaction/attitudes</b><br/>                 Satisfaction (good overall 91% very satisfied or satisfied. Seventy-three percent (1255/1726, 95%confidence interval: 71% to 75%) were very satisfied with the way NHS 111 handled the whole process, 19% (319/1726) were fairly satisfied and 5% (79/1726) were dissatisfied. Two aspects of the service were less acceptable than others: 1) relevance of questions asked and 2) whether the advice given worked in practice.</p> <p><b>Greater satisfaction with higher urgency advice:</b><br/>                 Patients more likely to feel the service was helpful if directed to ambulance service (76%), compared with self-care(64%) visit health centre (55%), other service 54%, contact GP (52%).</p> <p><b>Services working together:</b><br/>                 Patients more likely to feel the service was helpful if an appointment was arranged for them (71%)</p> |
| <p><b>McAteer 2016 Scotland</b></p>   | <p>Other - mixed methods</p> | <p>Age and sex-stratified random sample of 256 adults from each of 14 Scottish GP surgeries, final sample was 1190 based on response rate with 601 of those having</p> | <p>NHS 24 (Non-clinical call handler)</p>                               | <p>General public (NHS 24 users and non-users)</p> | <p><b>General satisfaction/attitudes:</b></p> <ul style="list-style-type: none"> <li>• Questionnaire findings: over 80% of those who had used the NHS 24 service reported being either 'satisfied' or 'very satisfied' - education was the only socioeconomic factor associated with satisfaction (with higher educated participants being less satisfied). Interview findings: broadly satisfied with service.</li> <li>• Most common reasons for dissatisfaction related to initial triage questions ("I just felt that, she should get me onto a nurse and stop asking me questions, you know, I felt it went on too long.") and the length of time it took to receive visits and not being kept informed.</li> </ul>                                                                                                                                                                                                                         |

|                              |                 |                                                                                                             |                                   |                |                                                                                                                                                                                                                                                                                                                                                                                                                                                                                                                                                                                                                                                                                                                                                                                                                                                                                                                                                                                                                                                                                              |
|------------------------------|-----------------|-------------------------------------------------------------------------------------------------------------|-----------------------------------|----------------|----------------------------------------------------------------------------------------------------------------------------------------------------------------------------------------------------------------------------------------------------------------------------------------------------------------------------------------------------------------------------------------------------------------------------------------------------------------------------------------------------------------------------------------------------------------------------------------------------------------------------------------------------------------------------------------------------------------------------------------------------------------------------------------------------------------------------------------------------------------------------------------------------------------------------------------------------------------------------------------------------------------------------------------------------------------------------------------------|
|                              |                 | used the NHS 24 service.<br>Purposive sampling used for interview group with total of 30 being interviewed. |                                   |                |                                                                                                                                                                                                                                                                                                                                                                                                                                                                                                                                                                                                                                                                                                                                                                                                                                                                                                                                                                                                                                                                                              |
| <b>Rahmqvist 2011 Sweden</b> | Survey          | Random sample of 660 callers, made at one SHD site in October 2008                                          | Swedish Healthcare Direct (Nurse) | General public | <p><b>Greater satisfaction with higher urgency advice</b></p> <p>Patients who were recommended to wait and see, were less likely to be satisfied and more likely to make an emergency visit or an on call doctor.</p> <p>Results reported in relation to callers' agreement with advice: Analysed using 3 groups: 1) cases: those who disagreed with nurse advice and felt they needed higher level of care; 2)controls: those who disagreed with nurse advice or felt they needed higher level of care; 3)other callers. Average global patient satisfaction was significantly lower for nurses who served the cases compared to those who had not served the cases: Global patient satisfaction: 3.2 in cases, 4.8 in controls, 6.4 in other</p>                                                                                                                                                                                                                                                                                                                                           |
| <b>Goode 2004 England</b>    | Interview study | 60 interviews.                                                                                              | NHS Direct (Nurse)                | General public | <p><b>General satisfaction/attitudes</b></p> <p>Results related to feelings that NHS Direct was 'trustworthy', and being able to access care without being a 'nuisance'. Authors state that some interviewees experienced or predicted deterioration in service quality: "They'll put a bit too much work on their call centres, they'll be understaffed, then they'll start becoming hurried or you'll lose that friendly 'take as long as you like' sort of attitude that I experienced. . . ."</p> <p><b>Experience of call taker: reassurance</b></p> <p>Users felt reassurance / felt the service was caring:</p> <ul style="list-style-type: none"> <li>• "I felt like they cared. I was suffering and I felt like they cared. And that's what I wanted"</li> <li>• "For me to be able to ring somebody, you know, and when I did feel in pain, but wasn't sure whether it was normal or not – well I knew that it wasn't normal, but is it common? And it was nice just to speak to somebody. And, 'Okay, yeah, do go to your doctors', you know, 'you're not being silly'</li> </ul> |

|                                                                                                                            |                            |                 |                                                       |                                    |                                                                    |                                                                                                                                                                                                                                                                                                                                                                                                                                                                                                                                                                                                                                                                                                                                                                                                                                                                                                                                                                                                                                                                                                                                                                                                                                                                                                                                                                                     |
|----------------------------------------------------------------------------------------------------------------------------|----------------------------|-----------------|-------------------------------------------------------|------------------------------------|--------------------------------------------------------------------|-------------------------------------------------------------------------------------------------------------------------------------------------------------------------------------------------------------------------------------------------------------------------------------------------------------------------------------------------------------------------------------------------------------------------------------------------------------------------------------------------------------------------------------------------------------------------------------------------------------------------------------------------------------------------------------------------------------------------------------------------------------------------------------------------------------------------------------------------------------------------------------------------------------------------------------------------------------------------------------------------------------------------------------------------------------------------------------------------------------------------------------------------------------------------------------------------------------------------------------------------------------------------------------------------------------------------------------------------------------------------------------|
| 1<br>2<br>3<br>4<br>5<br>6<br>7<br>8<br>9<br>10<br>11<br>12<br>13<br>14<br>15<br>16<br>17<br>18<br>19                      | <b>Winneby 2014 Sweden</b> | Interview study | 8 semi-structured interviews                          | Swedish Healthc are Direct (Nurse) | General public                                                     | <p><b><i>The authors describe a theme of 'being believed and taken seriously'</i></b></p> <p><b><i>Experience of call taker: feeling reassured when taken seriously</i></b></p> <p>The authors describe findings relating to users feeling re-assured on follow up care required: ". When the nurse believed and advised them to turn to the care center on duty, having obtained a mandate to go there, gave them a sense of security". A quote from a participant: "<i>Because they [nurses] know more than I do and will refer me if it's something serious.</i>"</p> <p><b><i>Assertiveness and negotiation</i></b></p> <p><i>"Being a nurse, I know what to say and what I've done at home. Otherwise they will tell you to "drink plenty of fluids" and 'do this and that'. But now I say that "I have drunk a lot" and 'I have medication at home'. It feels as if they [SHD] try to sift out and turn away . . . you don't call unless it's necessary."</i></p>                                                                                                                                                                                                                                                                                                                                                                                                             |
| 20<br>21<br>22<br>23<br>24<br>25<br>26<br>27<br>28<br>29<br>30<br>31<br>32<br>33<br>34<br>35<br>36<br>37<br>38<br>39<br>40 | <b>Goode et al</b>         | Interview study | Primarily focussed on 10 interviews with male callers | NHS Direct (Nurse)                 | Findings from interviews with men / finding s that relating to men | <p><b><i>General satisfaction/attitudes (male users)</i></b></p> <ul style="list-style-type: none"> <li>• A participant commented on male partner: "'He thought it was great. He was very impressed. And a male nurse spoke to him as well, which I think he was even more impressed that a man would know what he was talking about . . . and he came off the phone – 'Oh that's no problem. He said a lady of 88 drank a full bottle and she was fine!'"</li> <li>• The authors describe a male interviewee whose wife called on his behalf about his 'palpitations', "In line with their practice when someone makes a call on behalf of a patient who is capable of having a dialogue, NHS Direct had talked to him in person in order to assess his symptoms. Despite insisting that he had not been at all worried, he related having found the contact 'very reassuring'. He now described NHS Direct as an excellent and much-needed service, which he would continue to use to meet his need for 'expert' guidance on the appropriate response to symptoms."</li> </ul> <p><b><i>Assertiveness and negotiation</i></b></p> <p>One male participant made a follow up call to NHSDirect regarding his wife, whilst his wife was waiting for a call back from the service:</p> <p>"I simply had one aim at that point, which was to get a doctor out to the house without</p> |

1  
2  
3  
4  
5  
6  
7  
8  
9  
10  
11  
12  
13  
14  
15  
16  
17  
18  
19  
20  
21  
22  
23  
24  
25  
26  
27  
28  
29  
30  
31  
32  
33  
34  
35  
36  
37  
38  
39  
40  
41  
42  
43  
44  
45  
46

putting the phone down . . . everything was pretty much arranged in the one call. It was acknowledged that things were bad and that a doctor would be calling tonight . . . I guess I was being pretty direct, like, 'She is sick and she must be seen.'

1  
2  
3  
4  
5  
6

For peer review only

## *User experience*

Three studies showed a high level of satisfaction amongst users(6, 29, 38). Two studies reported higher satisfaction amongst those who received higher urgency advice(38, 39). Two studies reported dissatisfaction with relevance and number of triage questions(6, 38). Three studies highlighted that callers felt they needed to be assertive in order to receive the expected care advice(41, 43, 44). For example, a user's post to an online forum:

"If you need help and advice you can always call the healthcare advice line, if you think they're giving you the 'wrong' advice, tell them, and maybe you'll get better help"(43).

Two studies reported that users felt that the nurses using digital triage gave them time, conducted 'thorough' assessments and felt reassured(42, 44).

In contrast, one study of users who posted to an online forum reported feeling scrutinized by the nurses questioning their symptoms and need for care(43). Some expressed doubts about nurses' advice, competency and credibility(43).

## *Integration of services*

Integrated services made for a smoother patient care journey. One study based on an online forum described the experience of poor integration:

"They send you to the ER where they yell at you for being stupid enough to listen to them (SHD). SHD is a big problem and seems to be at war with the ER"(43).

1  
2  
3 1 In contrast, there was high satisfaction in 71%, of users where the service provider was able to book  
4  
5 2 an appointment at a local service on behalf of the patient (38).  
6  
7  
8  
9 3

## 4 Discussion

5

6 This systematic review has evaluated the evidence on how telephone-based digital triage affects  
7 wider health care service use, clinical outcomes and user experience in urgent care. Thirty-one  
8 studies were included, covering a range of different designs, settings, populations and digital triage  
9 systems. Studies typically showed no change or a reduction in wider healthcare service use  
10 following the implementation of digital triage. They reported varied levels of caller adherence to the  
11 triage advice provided. There was very limited evidence on clinical outcomes; however four studies  
12 reported some findings on hospitalisation rates which highlighted potential safety concern relating  
13 to under-triage.

14 Overall user satisfaction with telephone digital triage appears to be high, but there was some  
15 evidence of poorer user experience relating to the length and relevance of triage questioning, and  
16 perceptions of 'under-triage'. Users sometimes felt the need for assertiveness during calls when  
17 their expectations were not being met; however, this is unlikely to be specific to digital triage and  
18 has been reported in telephone based consultation more widely(47).

19 There was considerable heterogeneity across studies in terms of types of setting, types of  
20 participants, study designs and 'digital triage' systems. 'Digital triage' is a complex intervention with  
21 outcomes that may be influenced by multiple factors due to varying healthcare systems, local service  
22 configuration, staff training and evolving digital triage tools. Hence, there needs to be caution in the  
23 interpretation of the applicability of findings. Many of the studies that investigated service use  
24 following digital triage implementation reported no change in wider healthcare service use. In one  
25 context, for example, following the replacement of a nurse-led service with a non-clinician led

1 service this may be seen as a success(36), but this may not be applicable to all healthcare settings.  
2  
3 One study of 'standalone' digital triage implementation showed an increase in GP clinic use(28),  
4  
5 which was in contrast to other studies in this review; this may be because this service was less  
6  
7 embedded within the healthcare system, but could also have been a methodological consequence of  
8  
9 using household surveys to gather service use data(28).  
10  
11  
12  
13  
14  
15  
16

## 17 **Strengths and limitations**

18  
19

20 This is the first systematic review to focus on the use of telephone based digital triage in urgent care.  
21  
22 It covered a 20-year period, during which some services have started to shift towards non-clinician  
23  
24 led models of service delivery. This review enabled evaluation of a broad range of service models  
25  
26 and settings. However, it was limited to studies published in English, and this may have led to  
27  
28 important evidence being overlooked.  
29  
30

31 This review used a comprehensive mixed methods approach and evaluated quality of studies using  
32  
33 the MMAT tool. Whilst this tool worked well for many studies in this review, an acknowledged  
34  
35 limitation(48) is the applicability of its criteria for assessing studies that are cross-sectional in nature  
36  
37 (where there are not necessarily defined groups with an intervention or exposure); this is applicable  
38  
39 to some of the studies included in this review.  
40  
41  
42  
43

44 There was limited evaluation of non-clinician led models of digital triage, with only one study  
45  
46 evaluating service use following implementation and no studies of clinical outcomes. Another  
47  
48 limitation is the scope of the included outcomes; outcomes relating to broad utilisation of services,  
49  
50 cost effectiveness, and staff focussed outcomes were not covered.  
51  
52  
53

54 23

## 56 **Comparison with other literature**

57  
58  
59  
60



1  
2  
3 1 This review's focus is narrower, in terms of intervention and setting, compared to previous  
4  
5 2 reviews(1, 10). A systematic review by Bunn et al. (including digital triage, non-digital triage and  
6  
7 3 wider care settings) evaluated telephone triage in comparison to usual care(10). They similarly  
8  
9 4 reported no significant change in wider healthcare use (ED visits, routine GP visits and  
10  
11 5 hospitalisations) associated with telephone triage. Other reviews found that user satisfaction is  
12  
13 6 generally high when comparing telephone consultation with other forms of care(10), but lower  
14  
15 7 satisfaction was described when patients' initial expectations were not met(47).  
16  
17  
18  
19 8 Our review highlights the limited evaluation of clinical outcomes. A previous review of telephone  
20  
21 9 triage reported limited and inconclusive findings on mortality rates (with no mortalities occurring in  
22  
23 10 some studies that sought to investigate this outcome), and rates of under-triage and subsequent  
24  
25 11 hospitalisation ranging from 0.2% – 5.25%(1).  
26  
27  
28  
29 12 Although our review did not include broad utilisation outcomes, a previous study reported lower  
30  
31 13 than expected use by some ethnic minority groups(49). Our review found that no studies to date  
32  
33 14 have reported on patterns of advice, user experience, service use or clinical outcomes in ethnic  
34  
35 15 minority groups.  
36  
37  
38  
39 16 We found that patients' adherence with advice varied by setting and study design. While very high  
40  
41 17 adherence was reported in one survey based study(24), this may be an overestimate due to  
42  
43 18 response bias in comparison to other studies that evaluated adherence based on routine data.  
44  
45 19 Similar observations in higher adherence rates in self-reported service use were reported by two  
46  
47 20 reviews(13, 50).  
48  
49  
50  
51  
52

### 22 **Implications for service delivery and future research**

23

24 The review has identified several gaps in the literature, particularly a need for evaluation of patient  
57  
58 25 level service use and clinical outcomes. Further analysis of large patient level datasets (particularly  
59  
60

1 those that are linked with subsequent service use and clinical outcomes data) will help to gain a  
2 better understanding of who does and does not adhere to advice and help to evaluate safety  
3 concerns relating to under triage within particular patient sub-groups.

4 In the absence of comparative studies, it is unclear how patient satisfaction and outcomes are  
5 affected by the design of services, the staff groups involved and how they are trained and managed,  
6 and the type of digital triage system deployed. Further evaluation of non-clinician led digital triage  
7 may help policy makers and service commissioners to adopt the most efficient and safe digital triage  
8 systems.

9 Whilst not a key aim, this review highlights that associations between factors (such as age, gender,  
10 ethnicity) and urgency of advice have not been explored in depth. The granular demographic and  
11 symptom data captured by digital triage tools gives opportunity to explore these associations which  
12 will likely provide insight into how services are used by different groups and form the basis for  
13 generating hypotheses within particular groups.

14 Many studies in this review were undertaken when the digital triage was first being implemented.  
15 However, like any significant service change, digital triage services will take a significant period of  
16 time to become established and performing optimally within urgent care services that have been  
17 used to working in another way. To date, no studies have involved longitudinal data collection to  
18 evidence the extent to which this occurs. Longer term evaluation studies are needed to explore how  
19 the safety and effectiveness of services changes over time. In addition, telephone based approaches  
20 to seeking care have been critical during the Covid-19 pandemic and are likely to be more widely  
21 adopted in the long term(51); therefore, evaluation of how these services have functioned during  
22 and after the pressures of a pandemic is also important.

23 Lastly, this review highlights limited qualitative and mixed methods approaches to date. Integrating  
24 findings from routine data with qualitative research will help to better understand user experiences

1  
2  
3 1 and care needs of particular patients groups in more depth. These could feed into targeted support  
4  
5 2 for these groups within or outside of digital triage services, and ultimately improved delivery of  
6  
7 3 these services which are key to a well functioning healthcare system.  
8  
9

#### 10 4 **Competing interests**

11  
12  
13  
14 5 The authors declare that they have no competing interests  
15  
16

#### 17 6 **Funding statement**

18  
19  
20 7 This systematic review is part of a PhD that is funded through University of Warwick in collaboration  
21  
22 8 with an industrial partner: Advanced (<https://www.oneadvanced.com/>)  
23  
24

#### 25 9 **Authors' contributions**

26  
27  
28 10 VS developed the review protocol, with the support of HA and JD. VS conducted searches. VS, CB, ES,  
29  
30 11 JB conducted screening, data extraction and quality assessment. VS conducted the narrative  
31  
32 12 synthesis with support from CB and HA. HA and JD reviewed and revised manuscript and approved  
33  
34 13 the final version. VS in the guarantor for the review.  
35  
36  
37

#### 38 14 **Acknowledgements**

39  
40  
41 15 The authors would like to thank Samantha Johnson (Academic Support Librarian, University of  
42  
43 16 Warwick) for support with developing the search strategy. Patients and or public were not involved  
44  
45 17 directly in the conduct of this review.  
46  
47  
48

#### 49 50 51 **References**

- 52  
53 19 1. Huibers L, Smits M, Renaud V, Giesen P, Wensing M. Safety of telephone triage in out-of-  
54 20 hours care: A systematic review. *Scandinavian Journal of Primary Health Care*. 2011;29(4):198-209.  
55 21 2. Tan S, Mays N. Impact of initiatives to improve access to, and choice of, primary and urgent  
56 22 care in England: A systematic review. *Health Policy*. 2014;118(3):304-15.  
57 23 3. Salisbury C, Coulter A. Urgent care and the patient. *Emergency Medicine Journal*.  
58 24 2010;27(3):181-2.  
59  
60

- 1 4. Blakoe M, Gamst-Jensen H, von Euler-Chelpin M, Christensen HC, Moller T.  
2 Sociodemographic and health-related determinants for making repeated calls to a medical helpline:  
3 a prospective cohort study. *Bmj Open*. 2019;9(7).
- 4 5. Elliott AM, McAteer A, Heaney D, Ritchie LD, Hannaford PC. Examining the role of  
5 Scotland's telephone advice service (NHS 24) for managing health in the community: analysis  
6 of routinely collected NHS 24 data. *BMJ Open*. 2015;5(8):e007293.
- 7 6. McAteer A, Hannaford PC, Heaney D, Ritchie LD, Elliott AM. Investigating the public's use of  
8 Scotland's primary care telephone advice service (NHS 24): a population-based cross-sectional study.  
9 *British Journal of General Practice*. 2016;66(646):e337.
- 10 7. Njeru JW, Damodaran S, North F, Jacobson DJ, Wilson PM, St Sauver JL, et al. Telephone  
11 triage utilization among patients with limited English proficiency. *BMC Health Serv Res*.  
12 2017;17(1):706.
- 13 8. North F, Varkey P, Laing B, Cha SS, Tulledge-Scheitel S. Are e-health web users looking for  
14 different symptom information than callers to triage centers? *Telemedicine journal and e health* :  
15 the official journal of the American Telemedicine Association. 2011;17(1):19-24.
- 16 9. McKenzie R, Williamson M, Roberts R. Who uses the 'after hours GP helpline'? A profile of  
17 users of an after-hours primary care helpline. *Australian Family Physician*. 2016;45:313-8.
- 18 10. Bunn F, Byrne G, Kendall S. The effects of telephone consultation and triage on healthcare  
19 use and patient satisfaction: a systematic review. *British Journal of General Practice*.  
20 2005;55(521):956.
- 21 11. Blank L, Coster J, O'Cathain A, Knowles E, Tosh J, Turner J, et al. The appropriateness of, and  
22 compliance with, telephone triage decisions: a systematic review and narrative synthesis. *Journal of*  
23 *Advanced Nursing*. 2012;68(12):2610-21.
- 24 12. Randell. Effects of computerized decision support systems on nursing performance and  
25 patient outcomes: a systematic review. *Journal of Health Services Research & Policy*.  
26 2007;12(4):242-51.
- 27 13. Carrasqueiro S, Oliveira M, Encarnação P. Evaluation of telephone triage and advice services:  
28 A systematic review on methods, metrics and results. *Studies in health technology and informatics*.  
29 2011;169:407-11.
- 30 14. Sexton V, Dale J, Atherton H. An evaluation of service user experience, clinical outcomes and  
31 service use associated with urgent care services that utilise telephone-based digital triage: a  
32 systematic review protocol. *Syst*. 2021;10(1):25.
- 33 15. Hong QN. 'Mixed Methods Appraisal Tool' version 2018 public wiki [Available from:  
34 <http://mixedmethodsappraisaltoolpublic.pbworks.com/w/page/24607821/FrontPage>].
- 35 16. Poyay J. Guidance on the conduct of narrative synthesis in systematic reviews 2006 30 March  
36 2020. Available from:  
37 [https://www.researchgate.net/profile/Mark\\_Rodgers4/publication/233866356\\_Guidance\\_on\\_the\\_c](https://www.researchgate.net/profile/Mark_Rodgers4/publication/233866356_Guidance_on_the_conduct_of_narrative_synthesis_in_systematic_reviews_A_product_from_the_ESRC_Methods_Programme/links/02e7e5231e8f3a6183000000/Guidance-on-the-conduct-of-narrative-synthesis-in-systematic-reviews-A-product-from-the-ESRC-Methods-Programme.pdf)  
38 [nduct\\_of\\_narrative\\_synthesis\\_in\\_systematic\\_reviews\\_A\\_product\\_from\\_the\\_ESRC\\_Methods\\_Progr](https://www.researchgate.net/profile/Mark_Rodgers4/publication/233866356_Guidance_on_the_conduct_of_narrative_synthesis_in_systematic_reviews_A_product_from_the_ESRC_Methods_Programme/links/02e7e5231e8f3a6183000000/Guidance-on-the-conduct-of-narrative-synthesis-in-systematic-reviews-A-product-from-the-ESRC-Methods-Programme.pdf)  
39 [amme/links/02e7e5231e8f3a6183000000/Guidance-on-the-conduct-of-narrative-synthesis-in-](https://www.researchgate.net/profile/Mark_Rodgers4/publication/233866356_Guidance_on_the_conduct_of_narrative_synthesis_in_systematic_reviews_A_product_from_the_ESRC_Methods_Programme/links/02e7e5231e8f3a6183000000/Guidance-on-the-conduct-of-narrative-synthesis-in-systematic-reviews-A-product-from-the-ESRC-Methods-Programme.pdf)  
40 [systematic-reviews-A-product-from-the-ESRC-Methods-Programme.pdf](https://www.researchgate.net/profile/Mark_Rodgers4/publication/233866356_Guidance_on_the_conduct_of_narrative_synthesis_in_systematic_reviews_A_product_from_the_ESRC_Methods_Programme/links/02e7e5231e8f3a6183000000/Guidance-on-the-conduct-of-narrative-synthesis-in-systematic-reviews-A-product-from-the-ESRC-Methods-Programme.pdf).
- 41 17. North F, Muthu A, Varkey P. Differences between surrogate telephone triage calls in an adult  
42 population and self calls. *Journal of Telemedicine and Telecare*. 2010;17(3):118-22.
- 43 18. Cook EJ, Randhawa G, Large S, Guppy A, Chater AM, Pang D. Young people's use of NHS  
44 Direct: a national study of symptoms and outcome of calls for children aged 0–15. *BMJ Open*.  
45 2013;3(12):e004106.
- 46 19. Hsu W-C, Bath PA, Large S, Williams S. Older people's use of NHS Direct. *Age and Ageing*.  
47 2011;40(3):335-40.
- 48 20. North F, Varkey P. How serious are the symptoms of callers to a telephone triage call centre?  
49 *Journal of Telemedicine and Telecare*. 2010;16(7):383-8.
- 50 21. Payne F, Jessopp L. NHS Direct: review of activity data for the first year of operation at one  
51 site. *J Public Health Med*. 2001;23(2):155-8.

1  
2  
3  
4  
5  
6  
7  
8  
9  
10  
11  
12  
13  
14  
15  
16  
17  
18  
19  
20  
21  
22  
23  
24  
25  
26  
27  
28  
29  
30  
31  
32  
33  
34  
35  
36  
37  
38  
39  
40  
41  
42  
43  
44  
45  
46  
47  
48  
49  
50  
51  
52  
53  
54  
55  
56  
57  
58  
59  
60

- 1 22. Jácome M, Rego N, Veiga P. Potential of a nurse telephone triage line to direct elderly to  
2 appropriate health care settings. *J Nurs Manag.* 2019;27(6):1275-84.
- 3 23. Zwaanswijk M, Nielen MMJ, Hek K, Verheij RA. Factors associated with variation in urgency  
4 of primary out-of-hours contacts in the Netherlands: A cross-sectional study. *BMJ Open.* 2015;5(10).
- 5 24. Byrne G, Morgan J, Kendall S, Saberi D. A survey of NHS Direct callers' use of health services  
6 and the interventions they received. *Primary Health Care Research & Development.*  
7 2007;8(1):91-100.
- 8 25. Foster J, Jessopp L, Chakraborti S. Do callers to NHS Direct follow the advice to attend an  
9 accident and emergency department? *Emergency Medicine Journal.* 2003;20(3):285.
- 10 26. Munro J, Sampson F, Nicholl J. The impact of NHS Direct on the demand for out-of-hours  
11 primary and emergency care. *British Journal of General Practice.* 2005;55(519):790.
- 12 27. Munro J, Nicholl J, Cathain A, Knowles E. Impact of NHS Direct on demand for immediate  
13 care: observational study. *BMJ.* 2000;321(7254):150.
- 14 28. Dunt D, Day SE, Kelaher M, Montalto M. Impact of standalone and embedded telephone  
15 triage systems on after hours primary medical care service utilisation and mix in Australia. *Australia  
16 and New Zealand Health Policy.* 2005;2(1).
- 17 29. Turbitt E, Freed GL. Use of a telenursing triage service by Victorian parents attending the  
18 emergency department for their child's lower urgency condition. *Emerg Med Australas.*  
19 2015;27(6):558-62.
- 20 30. Lattimer V, Sassi F, George S, Moore M, Turnbull J, Mullee M, et al. Cost analysis of nurse  
21 telephone consultation in out of hours primary care: evidence from a randomised controlled trial.  
22 *BMJ.* 2000;320(7241):1053-7.
- 23 31. Huibers L, Koetsenruijter J, Grol R, Giesen P, Wensing M. Follow-up after telephone  
24 consultations at out-of-hours primary care. *Journal of the American Board of Family Medicine.*  
25 2013;26(4):373-9.
- 26 32. Sprivilis P, Carey M, Rouse I. Compliance with advice and appropriateness of emergency  
27 presentation following contact with the HealthDirect telephone triage service. *Emergency Medicine.*  
28 2004;16(1):35-40.
- 29 33. Morimura N, Aruga T, Sakamoto T, Aoki N, Ohta S, Ishihara T, et al. The impact of an  
30 emergency telephone consultation service on the use of ambulances in Tokyo. *Emergency Medicine  
31 Journal.* 2011;28(1):64-70.
- 32 34. Dale J, Higgins J, Williams S, Foster T, Snooks H, Crouch R, et al. Computer assisted  
33 assessment and advice for "non-serious" 999 ambulance service callers: the potential impact on  
34 ambulance despatch. *Emergency Medicine Journal.* 2003;20(2):178-83.
- 35 35. Stewart B, Fairhurst R, Markland J, Marzouk O. Review of calls to NHS Direct related to  
36 attendance in the paediatric emergency department. *Emergency Medicine Journal.* 2006;23(12):911.
- 37 36. Turner J, O'Cathain A, Knowles E, Nicholl J. Impact of the urgent care telephone service NHS  
38 111 pilot sites: a controlled before and after study. *BMJ Open.* 2013;3(11):e003451.
- 39 37. Siddiqui N, Greenfield D, Lawler A. Calling for confirmation, reassurance, and direction:  
40 Investigating patient compliance after accessing a telephone triage advice service. *International  
41 Journal of Health Planning and Management.* 2020:735-45.
- 42 38. O'Cathain A, Knowles E, Turner J, Nicholl J. Acceptability of NHS 111 the telephone service  
43 for urgent health care: cross sectional postal survey of users' views. *Fam Pract.* 2014;31(2):193-200.
- 44 39. Rahmqvist M, Ernesäter A, Holmström I. Triage and patient satisfaction among callers in  
45 Swedish computer-supported telephone advice nursing. *Journal of Telemedicine and Telecare.*  
46 2011;17(7):397-402.
- 47 40. Lattimer V, Sassi F, George S, Moore M, Turnbull J, Mullee M, et al. Cost analysis of nurse  
48 telephone consultation in out of hours primary care: Evidence from a randomised controlled trial.  
49 *British Medical Journal.* 7241;320(7241):1053-7.
- 50 41. Goode J, Hanlon G, Luff D, O'Cathain A, Strangleman T, Greatbatch D. Male Callers to NHS  
51 Direct: The Assertive Carer, the New Dad and the Reluctant Patient. *Health.* 2004;8(3):311-28.

- 1  
2  
3 1 42. Goode J. Risk and the responsible health consumer: the problematics of entitlement among  
4 2 callers to NHS Direct. *Critical social policy*. 2004;24(2):12.  
5 3 43. Björkman A, Salzmänn-Erikson M. The bidirectional mistrust: Callers' online discussions  
6 4 about their experiences of using the national telephone advice service. *Internet Research*.  
7 5 2018;28(5):1336-50.  
8 6 44. Winneby E, Flensner G, Rudolfsson G. Feeling rejected or invited: Experiences of persons  
9 7 seeking care advice at the Swedish Healthcare Direct organization. *Japan Journal of Nursing Science*.  
10 8 2014;11(2):87-93.  
11 9 45. Mark AL, Shepherd ID. How has NHS Direct changed primary care provision? *J Telemed*  
12 10 *Telecare*. 2003;9 Suppl 1:S57-9.  
13 11 46. Ernesäter A, Engström M, Holmström I, Winblad U. Incident reporting in nurse-led national  
14 12 telephone triage in Sweden: the reported errors reveal a pattern that needs to be broken. *Journal of*  
15 13 *Telemedicine and Telecare*. 2010;16(5):243-7.  
16 14 47. Lake R, Georgiou A, Li J, Li L, Byrne M, Robinson M, et al. The quality, safety and governance  
17 15 of telephone triage and advice services - an overview of evidence from systematic reviews. *BMC*  
18 16 *Health Serv Res*. 2017;17(1):614.  
19 17 48. Hong Q. Questions on the MMAT version 2018 [Available from:  
20 18 <http://mixedmethodsappraisaltoolpublic.pbworks.com/w/page/71030694/FAQ>.  
21 19 49. Cook EJ, Randhawa G, Large S, Guppy A, Chater AM, Pang D. Who uses NHS Direct?  
22 20 Investigating the impact of ethnicity on the uptake of telephone based healthcare. *Int J Equity*  
23 21 *Health*. 2014;13:99-.  
24 22 50. Blank L, Coster J, O'Cathain A, Knowles E, Tosh J, Turner J, et al. The appropriateness of, and  
25 23 compliance with, telephone triage decisions: a systematic review and narrative synthesis. *Journal of*  
26 24 *Advanced Nursing*. 2012;68(12):2610-21.  
27 25 51. Wosik J, Fudim M, Cameron B, Gellad ZF, Cho A, Phinney D, et al. Telehealth transformation:  
28 26 COVID-19 and the rise of virtual care. *Journal of the American Medical Informatics Association*.  
29 27 2020;27(6):957-62.  
30  
31  
32  
33  
34  
35  
36  
37  
38  
39  
40  
41  
42  
43  
44  
45  
46  
47  
48  
49  
50  
51  
52  
53  
54  
55  
56  
57  
58  
59  
60

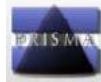

# PRISMA 2009 Checklist

| Section/topic                      | #  | Checklist item                                                                                                                                                                                                                                                                                              | Reported on page # |
|------------------------------------|----|-------------------------------------------------------------------------------------------------------------------------------------------------------------------------------------------------------------------------------------------------------------------------------------------------------------|--------------------|
| <b>TITLE</b>                       |    |                                                                                                                                                                                                                                                                                                             |                    |
| Title                              | 1  | Identify the report as a systematic review, meta-analysis, or both.                                                                                                                                                                                                                                         | 2                  |
| <b>ABSTRACT</b>                    |    |                                                                                                                                                                                                                                                                                                             |                    |
| Structured summary                 | 2  | Provide a structured summary including, as applicable: background; objectives; data sources; study eligibility criteria, participants, and interventions; study appraisal and synthesis methods; results; limitations; conclusions and implications of key findings; systematic review registration number. | 2                  |
| <b>INTRODUCTION</b>                |    |                                                                                                                                                                                                                                                                                                             |                    |
| Rationale                          | 3  | Describe the rationale for the review in the context of what is already known.                                                                                                                                                                                                                              | 4                  |
| Objectives                         | 4  | Provide an explicit statement of questions being addressed with reference to participants, interventions, comparisons, outcomes, and study design (PICOS).                                                                                                                                                  | 5                  |
| <b>METHODS</b>                     |    |                                                                                                                                                                                                                                                                                                             |                    |
| Protocol and registration          | 5  | Indicate if a review protocol exists, if and where it can be accessed (e.g., Web address), and, if available, provide registration information including registration number.                                                                                                                               | 4                  |
| Eligibility criteria               | 6  | Specify study characteristics (e.g., PICOS, length of follow-up) and report characteristics (e.g., years considered, language, publication status) used as criteria for eligibility, giving rationale.                                                                                                      | 5                  |
| Information sources                | 7  | Describe all information sources (e.g., databases with dates of coverage, contact with study authors to identify additional studies) in the search and date last searched.                                                                                                                                  | 5                  |
| Search                             | 8  | Present full electronic search strategy for at least one database, including any limits used, such that it could be repeated.                                                                                                                                                                               | 5<br>(appendix 2)  |
| Study selection                    | 9  | State the process for selecting studies (i.e., screening, eligibility, included in systematic review, and, if applicable, included in the meta-analysis).                                                                                                                                                   | 6                  |
| Data collection process            | 10 | Describe method of data extraction from reports (e.g., piloted forms, independently, in duplicate) and any processes for obtaining and confirming data from investigators.                                                                                                                                  | 6                  |
| Data items                         | 11 | List and define all variables for which data were sought (e.g., PICOS, funding sources) and any assumptions and simplifications made.                                                                                                                                                                       | 6<br>(appendix 3)  |
| Risk of bias in individual studies | 12 | Describe methods used for assessing risk of bias of individual studies (including specification of whether this was done at the study or outcome level), and how this information is to be used in any data synthesis.                                                                                      | 7                  |
| Summary measures                   | 13 | State the principal summary measures (e.g., risk ratio, difference in means).                                                                                                                                                                                                                               | n/a                |



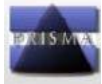

# PRISMA 2009 Checklist

1  
2  
3  
4  
5  
6  
7  
8  
9  
10  
11  
12  
13  
14  
15  
16  
17  
18  
19  
20  
21  
22  
23  
24  
25  
26  
27  
28  
29  
30  
31  
32  
33  
34  
35  
36  
37  
38  
39  
40  
41  
42  
43  
44  
45  
46  
47

|                      |    |                                                                                                                                                           |   |
|----------------------|----|-----------------------------------------------------------------------------------------------------------------------------------------------------------|---|
| Synthesis of results | 14 | Describe the methods of handling data and combining results of studies, if done, including measures of consistency (e.g., $I^2$ ) for each meta-analysis. | 7 |
|----------------------|----|-----------------------------------------------------------------------------------------------------------------------------------------------------------|---|

Page 1 of 2

| Section/topic                 | #                                                                                                                                          | Checklist item                                                                                                                                                                                           | Reported on page #          |
|-------------------------------|--------------------------------------------------------------------------------------------------------------------------------------------|----------------------------------------------------------------------------------------------------------------------------------------------------------------------------------------------------------|-----------------------------|
| Risk of bias across studies   | 15                                                                                                                                         | Specify any assessment of risk of bias that may affect the cumulative evidence (e.g., publication bias, selective reporting within studies).                                                             | 7                           |
| Additional analyses           | 16                                                                                                                                         | Describe methods of additional analyses (e.g., sensitivity or subgroup analyses, meta-regression), if done, indicating which were pre-specified.                                                         | n/a                         |
| <b>RESULTS</b>                |                                                                                                                                            |                                                                                                                                                                                                          |                             |
| Study selection               | 17                                                                                                                                         | Give numbers of studies screened, assessed for eligibility, and included in the review, with reasons for exclusions at each stage, ideally with a flow diagram.                                          | 6 (+ appendix 3)            |
| Study characteristics         | 18                                                                                                                                         | For each study, present characteristics for which data were extracted (e.g., study size, PICOS, follow-up period) and provide the citations.                                                             | 8 (table 1)                 |
| Risk of bias within studies   | 19                                                                                                                                         | Present data on risk of bias of each study and, if available, any outcome level assessment (see item 12).                                                                                                | 8 (table 1)                 |
| Results of individual studies | 20                                                                                                                                         | For all outcomes considered (benefits or harms), present, for each study: (a) simple summary data for each intervention group (b) effect estimates and confidence intervals, ideally with a forest plot. | n/a                         |
| Synthesis of results          | 21                                                                                                                                         | Present results of each meta-analysis done, including confidence intervals and measures of consistency.                                                                                                  | n/a                         |
| Risk of bias across studies   | 22                                                                                                                                         | Present results of any assessment of risk of bias across studies (see Item 15).                                                                                                                          | 8 (table 1) See MMAT rating |
| Additional analysis           | 23                                                                                                                                         | Give results of additional analyses, if done (e.g., sensitivity or subgroup analyses, meta-regression [see Item 16]).                                                                                    | n/a                         |
| <b>DISCUSSION</b>             |                                                                                                                                            |                                                                                                                                                                                                          |                             |
| Summary of evidence           | 24                                                                                                                                         | Summarize the main findings including the strength of evidence for each main outcome; consider their relevance to key groups (e.g., healthcare providers, users, and policy makers).                     | 44 – 45                     |
| Limitations                   | 25                                                                                                                                         | Discuss limitations at study and outcome level (e.g., risk of bias), and at review-level (e.g., incomplete retrieval of identified research, reporting bias).                                            | 45                          |
| Conclusions                   | 26                                                                                                                                         | Provide a general interpretation of the results in the context of other evidence, and implications for future research.                                                                                  | 46 - 47                     |
| <b>FUNDING</b>                | For peer review only - <a href="http://bmjopen.bmj.com/site/about/guidelines.xhtml">http://bmjopen.bmj.com/site/about/guidelines.xhtml</a> |                                                                                                                                                                                                          |                             |



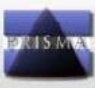

# PRISMA 2009 Checklist

1  
2  
3  
4  
5  
6  
7  
8  
9  
10  
11  
12  
13  
14  
15  
16  
17  
18  
19  
20  
21  
22  
23  
24  
25  
26  
27  
28  
29  
30  
31  
32  
33  
34  
35  
36  
37  
38  
39  
40  
41  
42  
43  
44  
45  
46  
47

|         |    |                                                                                                                                            |    |
|---------|----|--------------------------------------------------------------------------------------------------------------------------------------------|----|
| Funding | 27 | Describe sources of funding for the systematic review and other support (e.g., supply of data); role of funders for the systematic review. | 48 |
|---------|----|--------------------------------------------------------------------------------------------------------------------------------------------|----|

From: Moher D, Liberati A, Tetzlaff J, Altman DG, The PRISMA Group (2009). Preferred Reporting Items for Systematic Reviews and Meta-Analyses: The PRISMA Statement. PLoS Med 6(6): e1000097. doi:10.1371/journal.pmed1000097

For more information, visit: [www.prisma-statement.org](http://www.prisma-statement.org).

Page 2 of 2

For peer review only

**Appendix 2: Search terms used for Medline search**

| Concept      | Search terms                                                                                                                                                                             |
|--------------|------------------------------------------------------------------------------------------------------------------------------------------------------------------------------------------|
| Care setting | Primary care.mp OR Primary Health Care/ OR After-Hours Care/ OR Out of hours.mp OR Emergency care.mp OR Emergency Medical Services/ OR Urgent care OR Ambulatory Care AND                |
| Triage       | Triage.mp OR Triage/ OR Telephone consultation.mp AND                                                                                                                                    |
| Digital      | Digital OR Computer OR Software OR Online OR Internet OR Web OR Computerised OR Computerized OR electronic OR ECDS* OR CCDS* OR Decision Support Systems, Clinical/ OR Decision support* |

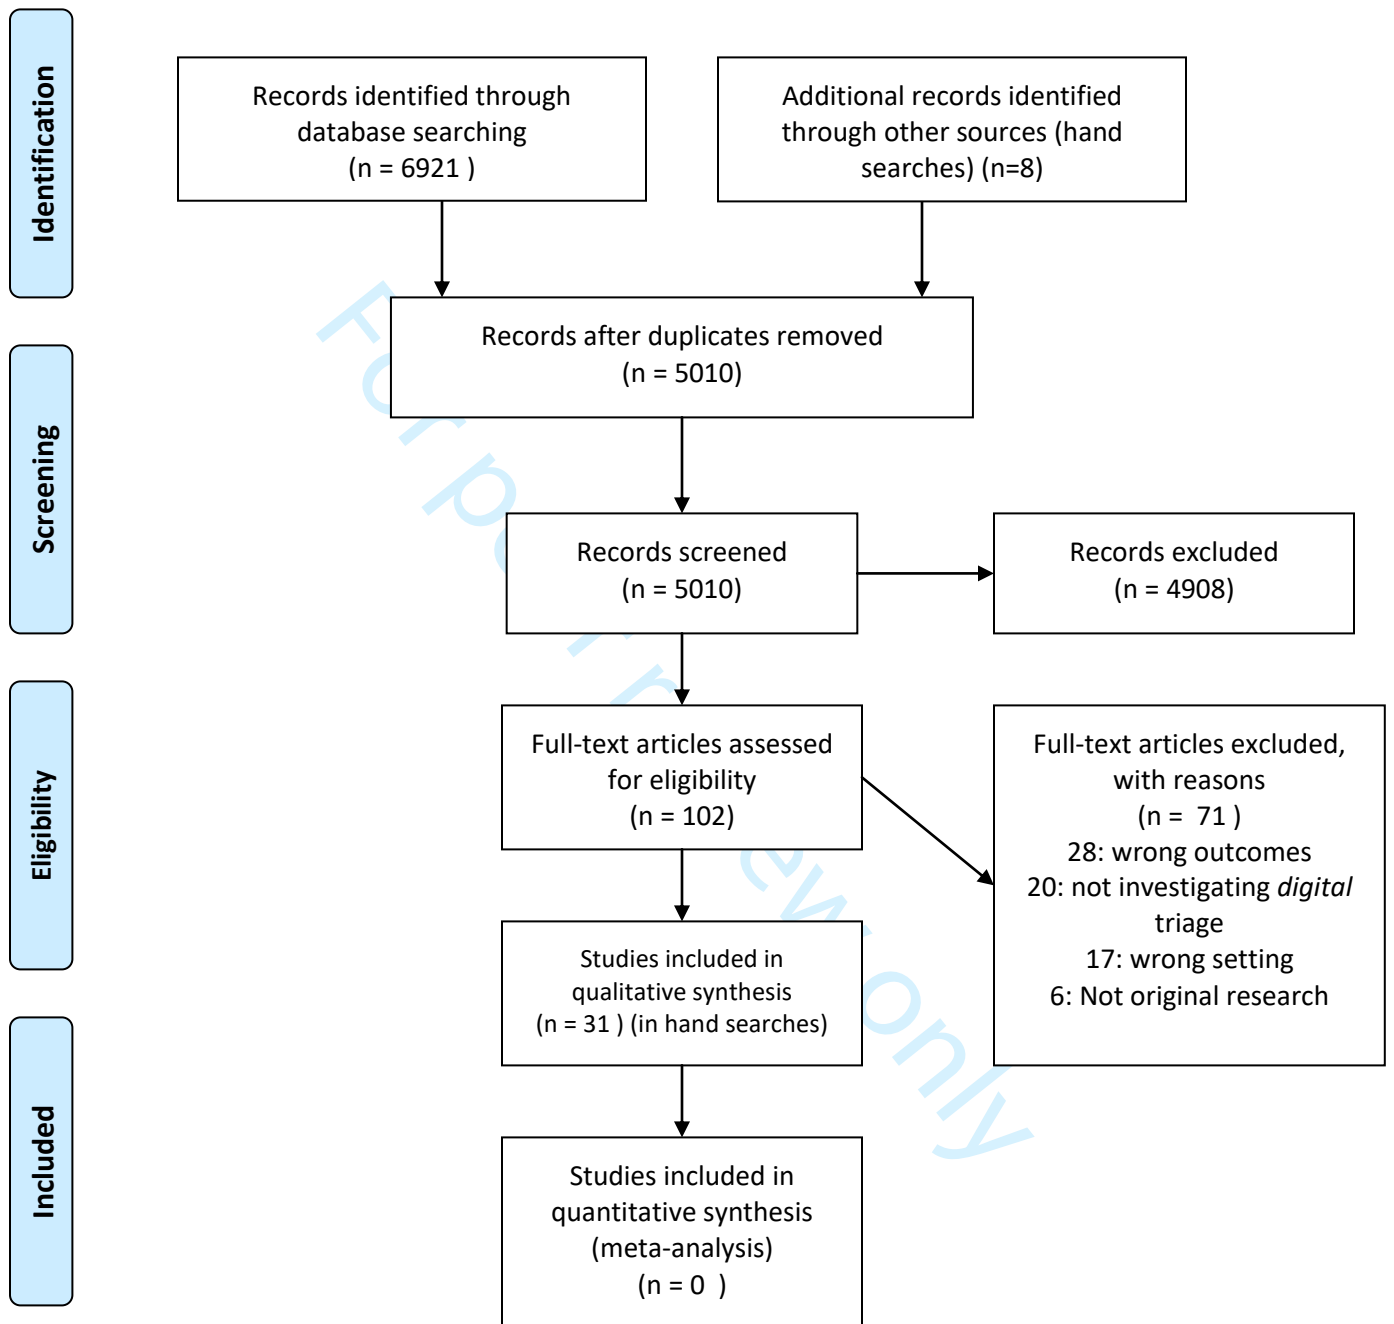

From: Moher D, Liberati A, Tetzlaff J, Altman DG, The PRISMA Group (2009). Preferred Reporting Items for Systematic Reviews and Meta-Analyses: The PRISMA Statement. PLoS Med 6(7): e1000097. doi:10.1371/journal.pmed1000097

For more information, visit [www.prisma-statement.org](http://www.prisma-statement.org).

For peer review only - <http://bmjopen.bmj.com/site/about/guidelines.xhtml>

## Appendix 4

### Data extraction form variables

The following information was extracted and entered into the data extraction form:

- Author
- Publication year
- Country
- Study design
- Care setting
- Participants
- Intervention details
- Type of care service staff conducting triage (doctor/nurse/paramedic/non-clinician),
- Comparator
- Outcomes
- Effect of intervention
- Contextual factors, (for example: staff experience and training, time that the service has been in place, level of support available to call takers).

## PROTOCOL

## Open Access

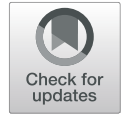

# An evaluation of service user experience, clinical outcomes and service use associated with urgent care services that utilise telephone-based digital triage: a systematic review protocol

Vanashree Sexton <sup>\*</sup>, Jeremy Dale and Helen Atherton

## Abstract

**Background:** Telephone-based digital triage is widely used by services that provide urgent care. This involves a call handler or clinician using a digital triage tool to generate algorithm-based care advice, based on a patient's symptoms. Advice typically takes the form of signposting within defined levels of urgency to specific services or self-care advice. Despite wide adoption, there is limited evaluation of its impact on service user experience, service use and clinical outcomes; no previous systematic reviews have focussed on services that utilise digital triage, and its impact on these outcome areas within urgent care. This review aims to address this need, particularly now that telephone-based digital triage is well established in healthcare delivery.

**Methods:** Studies assessing the impact of telephone-based digital triage on service user experience, health care service use and clinical outcomes will be identified through searches conducted in Medline, Embase, Cumulative Index to Nursing and Allied Health Literature (CINAHL), Web of Science and Scopus. Search terms using words relating to digital triage and urgent care settings (excluding in-hours general practice) will be used. The review will include all original study types including qualitative, quantitative and mixed methods studies; studies published in the last 20 years and studies published in English. Quality assessment of studies will be conducted using the Mixed Methods Appraisal Tool (MMAT); a narrative synthesis approach will be used to analyse and summarise findings.

**Discussion:** This is the first systematic review to evaluate service user experience, service use and clinical outcomes related to the use of telephone-based digital triage in urgent care settings. It will evaluate evidence from studies of wide-ranging designs. The narrative synthesis approach will enable the integration of findings to provide new insights on service delivery. Models of urgent care continue to evolve rapidly, with the emergence of self-triage tools and national help lines. Findings from this review will be presented in a practical format that can feed into the design of digital triage tools, future service design and healthcare policy.

**Systematic review registration:** This systematic review is registered on the international database of prospectively registered systematic reviews in health and social care (PROSPERO 2020 [CRD42020178500](https://doi.org/10.1186/1745-6215-2020-178500)).

**Keywords:** Digital interventions, Triage, Primary care, Urgent care, Emergency care, Telephone triage, Narrative synthesis

\* Correspondence: [ash.sexton@warwick.ac.uk](mailto:ash.sexton@warwick.ac.uk)

Unit of Academic Primary Care, Warwick Medical School, University of Warwick, Gibbet Hill, Coventry CV7 4AL, UK

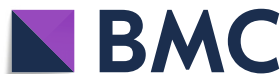

© The Author(s). 2021 **Open Access** This article is licensed under a Creative Commons Attribution 4.0 International License, which permits use, sharing, adaptation, distribution and reproduction in any medium or format, as long as you give appropriate credit to the original author(s) and the source, provide a link to the Creative Commons licence, and indicate if changes were made. The images or other third party material in this article are included in the article's Creative Commons licence, unless indicated otherwise in a credit line to the material. If material is not included in the article's Creative Commons licence and your intended use is not permitted by statutory regulation or exceeds the permitted use, you will need to obtain permission directly from the copyright holder. To view a copy of this licence, visit <http://creativecommons.org/licenses/by/4.0/>. The Creative Commons Public Domain Dedication waiver (<http://creativecommons.org/publicdomain/zero/1.0/>) applies to the data made available in this article, unless otherwise stated in a credit line to the data.

## Background

Telephone-based digital triage has been widely used by services that provide urgent care over the last several decades [1, 2]. Urgent care is the 'the range of responses that health and care services provide to people who require – or who perceive the need for – urgent advice, treatment or diagnosis' [3]. Within urgent care, different types of services utilise telephone-based digital triage, including national or regional help-lines, out-of-hours centres and emergency care providers. Examples of telephone-based services include England's National Health Service (NHS) 111 service, Scotland's NHS 24 service, Denmark's medical help line (MH1813), Australia's HealthDirect and the MayoClinic telephone service based in the USA [4–9].

Digital triage within these services involves a care service staff member using a digital triage tool to generate algorithm-based care advice, based on a patient's symptoms. Advice typically takes the form of signposting within defined levels of urgency to specific services, such as an emergency department (ED), out-of-hours centre, general practice (GP) appointment or self-care advice.

In part, these services have been implemented in response to increasing demand on primary care and hospital-based EDs over the last several decades [10]. They offer the potential to manage demand and improve consistency of care by providing a clear entry point or 'front door' to patients seeking care [11], which may simplify the patients decision on which service to access [12], and by providing appropriate advice based on the patient's symptom assessment [13]. There is a need for an up-to-date evaluation of the impact of these services on user experience, service use and clinical outcomes following triage, in order to evaluate success of these services and identify areas for improvement or further research.

Systematic reviews in this research area were conducted several years ago (between 2005 and 2012) [1, 10, 14–16]. Whilst their findings are useful in guiding research, in many cases, they have limited relevance as a result of the reorganisation of services in recent years [2]; an example of reorganisation is England's introduction of NHS 111 in 2011 [17], involving a workforce shift [18] away from the previous nurse led model to a non-clinician-led service [11]; this demonstrates the need to review more recent studies conducted within these services.

Despite wide adoption of digital triage within urgent care, previous reviews have not focussed on the digital triage element of services. In older literature, digital triage is often referred to as the use of computerised 'clinical decision support systems' (CDSS) in the context of telephone triage or consultation, as they were previously known [15]. Instead of focussing on digital triage, previous systematic reviews addressed

broader review questions to evaluate telephone triage, including services that use digital triage and those that are not digitally supported [1, 10, 14] or evaluate the use of CDSS on patient outcomes in wider healthcare functions, ranging from digital triage within primary care to treatment management in intensive care units [15].

These previous reviews show mixed results in terms of service user experience, clinical and service use outcomes, which likely result from varying contextual factors, including whether services use digital triage, the type of service, care setting, levels of clinical supervision, types of staff conducting triage and level of staff training. Compared to previous reviews, this review addresses a more narrow review question, which is focussed on services that utilise digital triage in the provision of out-of-hours urgent care. We are excluding 'in hours' care as to date digital triage has not been widely adopted in these settings during usual business opening hours.

This review additionally addresses the need to evaluate more recent studies that have analysed large routine triage and patient outcomes datasets that have become more readily available in recent years [11]. Previous reviews included studies with quantitative designs only [10, 14, 15]; this review will additionally include studies exploring patient outcomes through qualitative or mixed methods approaches [17] and will therefore facilitate the integration of findings from studies with mixed designs. Integration will allow for better understanding of the impact of digital triage on service user and patient outcomes, which may provide insights for the future development of digital triage and policy related to such service developments. Findings could also feed into the design of the newly emerging patient self-triage approaches that are being adopted by care services [19, 20], for example the NHS 111Online, which allows patients to self-triage and receive care advice online [21].

## Review question

How does telephone-based digital triage affect service user experience, clinical outcomes and health care service use in patients using out-of-hours urgent care services?

## Objectives

This review will explore the objectives below in out-of-hours urgent care services that utilise telephone-based digital triage:

1. To describe characteristics of patients accessing these services and the triage advice they receive
2. To explore service user (patient or carer) experience of triage

3. To evaluate patient health care service use following triage, including hospital admissions, ED attendance and GP attendance.
4. To evaluate patient clinical outcomes, including hospitalisations and mortality

3. Health care service use following triage: including hospital admissions, ED attendance and GP attendance
4. Patient clinical outcomes, including hospitalisations (number of hospitalisations, duration of hospitalisation, type of hospitalisation) and mortality

## Methods

A completed Preferred Reporting Items for Systematic Review and Meta-Analysis Protocols (PRISMA-P) checklist [22] showing the recommended items to include in a systematic review is included in Additional file 1.

### Eligibility criteria

Eligibility criteria have been developed using the population, interventions, comparators, outcomes and study designs (PICOS) principle [23] and will be applied to studies that are included in the review.

### Population

The review will include studies that evaluate the use of triage in the general population or within particular subgroups of the general population (for example children or older people).

### Interventions

The following eligibility criteria relating to the digital triage intervention will be applied to include:

1. Studies that assess the use of telephone-based digital triage in out-of-hours services that provide urgent care; these may include national or regional call centre-based urgent care telephone services, out-of-hours and urgent care centres and ambulance services. Services that only operate during 'in-hours' (for example, the use of digital triage for same day GP appointments) will not be included
2. Studies assessing the use of digital triage by the general population for any symptoms (not condition specific)
3. Studies assessing the use of digital triage that results in signposting (advising the patient to attend a local care service, such as an ED, an out-of-hours centre or advising the patient to book a GP appointment) and/or providing self-care advice

### Outcomes

Studies that assess outcomes relating to at least one of the following outcomes will be included:

1. Characteristics of patients and triage advice
2. Service user (patient or carer) experiences

### Study designs

All study types will be included: qualitative (interviews, focus groups, ethnography), quantitative (cohort studies, cross-sectional studies, randomised controlled trials) and mixed methods studies.

Additionally, only studies published in the English Language in the last 20 years will be included (studies conducted from 2000 to 2020): this time period has been chosen to identify changes in outcomes over time in relation to changing models of service delivery, for example changes in workforce mix [2, 18]. Full inclusion and exclusion criteria can be found in Appendix 1.

### Search strategy

Research databases will be searched using a search strategy and key words that have been developed with input from a librarian.

Search terms will include variations of terms relating to 'urgent care', 'triage' and 'digital'. Full search terms can be found in Appendix 2. A search will be conducted using the key words and Boolean strategies of 'AND' and 'OR'. The search terms will be modified as necessary according to the database being searched. The following databases will be searched: Medline (Ovid SP), Embase (Ovid SP), CINAHL, Web of Science and Scopus.

The search will be restricted to include studies published between the years 2000 and 2020, studies published in English, and studies electronically published (Epub) ahead of print.

### Data management and screening

References identified in the searches will be managed in Covidence systematic review management software; identified references will be imported into Covidence and de-duplicated.

In the first screening stage, titles and abstracts will be screened against the inclusion and exclusion criteria by two reviewers independently. References that meet the inclusion criteria will be screened again for inclusion at full-text level, by two reviewers independently. For any full-text articles that are excluded, exclusion reasons will be documented using Covidence.



1  
2  
3  
4 Any discrepancies on studies to be included at both  
5 screening stages will be resolved through discussion  
6 between the two reviewers. If a consensus is not  
7 reached, a third reviewer will be consulted. At the  
8 end of the two screening stages, a final set of studies  
9 to be included will be identified. The study selection  
10 process will be described through a Preferred Report-  
11 ing Items for Systematic Reviews and Meta-Analyses  
12 (PRISMA) flow chart [24].

13 Reviewers will independently extract relevant data  
14 from the included studies which will be recorded on  
15 a custom pre-defined data extraction form. The fol-  
16 lowing information will be extracted and entered  
17 into the data extraction form: author, publication  
18 year, country, study design, care setting, participants,  
19 intervention details, type of care service staff  
20 conducting triage (doctor/nurse/paramedic/non-clin-  
21 ician), comparator, outcomes, effect of intervention  
22 and contextual factors (for example: staff experience  
23 and training, time that the service has been in place,  
24 level of support available to call takers). Data extrac-  
25 tion discrepancies will be resolved through discus-  
26 sion between the reviewers, and a third reviewer will  
27 be consulted if necessary. Study authors may be con-  
28 tacted during the screening or data extraction where  
29 eligibility is unclear.

30 References of included studies will be screened by  
31 hand to identify any other eligible studies. Different  
32 reports that relate to the same study will be identified  
33 and labelled to indicate that they refer to the same  
34 study.

### 37 Risk of bias and quality assessment

38 Quality assessment will be conducted for all full-text  
39 peer-reviewed publications that fit the inclusion criteria,  
40 using the Mixed Methods Appraisal Tool version 2018  
41 (MMAT) [25], which is designed to enable the assess-  
42 ment of mixed studies.

43 If the reviewers disagree in their assessment of bias in  
44 a study, this will be resolved through discussion. Quality  
45 assessment will not be used to exclude studies from the  
46 review but will be taken into account in the synthesised  
47 findings.

48 Different types of biases which may be present in  
49 each study will be considered and presented in a risk  
50 of bias table. If missing data or selective reporting of  
51 outcomes is apparent in a study, the study author  
52 will be contacted to obtain information on the rea-  
53 sons behind the missing data and to assess the risk  
54 of any systematic differences in missing data. Studies  
55 of equal quality as determined through assessment  
56 with the MMAT and risk of bias assessment will be  
57 considered to have similar weighting, and this will

feed into the data synthesis to ensure trustworthiness  
of synthesis, serving to minimise bias.

Additionally, for quantitative studies, the occurrence  
of reporting (non-publication) bias will be evaluated  
by conducting checks of study registers (for example:  
ClinicalTrials.gov) to identify the completeness of the  
published literature included in the review; these  
findings will feed into the overall evaluation of the  
available evidence.

### Strategy for data synthesis

A narrative synthesis approach will be used, which is a  
'synthesis of findings from multiple studies that relies  
primarily on the use of words and text to summarise  
and explain the findings' [26]. This strategy has been  
chosen as the included studies are likely to be diverse in  
design and outcomes.

Narrative synthesis will be conducted to analyse, in-  
tegrate and summarise the evidence identified through  
data extraction and the findings from quality assess-  
ment. An iterative approach will be followed, based on  
four main elements: (1) theory development, (2) pre-  
liminary synthesis, (3) exploring relationships between  
evidence from studies and (4) assessing robustness of  
the synthesis conducted [26]. Key sub-groups and sub-  
sets of data will be identified through narrative synthe-  
sis, based on the findings of the included studies.

### Discussion

This review seeks to evaluate the impact of telephone-  
based digital triage by urgent care services on service  
user experience, and patients' clinical and service use  
outcomes. This is the first systematic review to evaluate  
these outcomes in relation to digital triage in the urgent  
care setting. In addition, this review includes mixed  
studies, enabling the integration of evidence from  
studies of wide-ranging design. It will be possible to  
investigate how findings have changed over time, by  
comparing results of studies carried out early in the im-  
plementation of these services as well more recent  
studies conducted in well-established services, and how  
other contextual factors influence findings. Urgent care  
delivery continues to develop rapidly; findings from this  
review will have potential to inform policy and practice  
related to the design and delivery of urgent care service  
delivery and should also highlight gaps in the evidence  
that require further investigation.

### Registration of review

This review is registered on the international database  
of prospectively registered systematic reviews in health  
and social care (PROSPERO 2020 CRD42020178500).  
Amendments to the protocol will be amended on the  
registration.



## Appendix 1

**Table 1** Inclusion and Exclusion criteria

| Inclusion                                                                                                                                                                                                                                                                                                                                                                                                                        | Exclusion                                                                                                                                                                                                                                                                                                                                                |
|----------------------------------------------------------------------------------------------------------------------------------------------------------------------------------------------------------------------------------------------------------------------------------------------------------------------------------------------------------------------------------------------------------------------------------|----------------------------------------------------------------------------------------------------------------------------------------------------------------------------------------------------------------------------------------------------------------------------------------------------------------------------------------------------------|
| Studies assessing telephone-based digital triage                                                                                                                                                                                                                                                                                                                                                                                 | Studies assessing telephone triage that is not digitally supported (e.g. triage conducted through paper protocols)<br>Studies assessing digital triage that is not telephone based (face to face)                                                                                                                                                        |
| Studies investigating telephone-based digital that is used for any/broad ranging symptoms (not condition specific)                                                                                                                                                                                                                                                                                                               | Studies assessing the use of digital triage for specific conditions (for example, digital tools that provide patient condition self-management or Cognitive Behavioural Therapy would be excluded)                                                                                                                                                       |
| Studies investigating telephone-based digital triage that conducted by a member of health care service staff (clinician or non-clinician)                                                                                                                                                                                                                                                                                        | Studies investigating digital triage that used by a patient directly for self-triage (e.g. 111online)                                                                                                                                                                                                                                                    |
| Studies that examine the use of digital triage tools resulting in signposting and/or self-care advice for the patient:<br>Examples of signposting include advice to the patient to book a GP appointment, attend ED, ambulance dispatch and self-care                                                                                                                                                                            | Studies that examine the use of digital triage tools resulting in other types of advice (e.g. condition specific advice only)                                                                                                                                                                                                                            |
| Telephone-based digital triage in services that provide urgent care, predominantly out of hours, including:<br>Call centre-based urgent care telephone services (examples: NHS Direct, NHS111), which may provide care 24/7<br>Out-of-hours and urgent care centres<br>Out-of-hours services run by general practices<br>Ambulance services (include only secondary triage of non-emergency calls, following initial assessment) | Studies in routine care settings.<br>Exclude triage services that only provide in-hours digital triage (for example, those used within usual general practice opening hours only).<br>Exclude triage that is utilised by hospital-based emergency departments, for example: the 'Canadian Triage and Acuity Scale' and the 'Manchester Triage System'    |
| Studies assessing outcomes relating to:<br>1. Patterns of telephone triage service use by patients<br>2. Service user (patient or carer) experience<br>3. Service use following triage, including: ED attendance, GP attendance and hospitalisations)<br>4. Health outcomes following triage, including mortality and hospitalisations                                                                                           | Studies that only explore outcomes that are not in the included list: e.g.<br>Studies that only explore experience of the staff member who uses the digital triage tool (e.g. non-clinician call handler for NHS 111, or nurse call taker for NHS Direct)<br>Accuracy outcomes: relating to comparison of triage outcomes between types of professionals |
| Studies of any design will be included<br>Examples: qualitative (interviews, focus groups, ethnography), quantitative (cohort studies, cross-sectional studies or RCTs) or mixed methods studies.                                                                                                                                                                                                                                | Reviews, discussion articles, conference abstracts, case reports                                                                                                                                                                                                                                                                                         |
| Studies published in English                                                                                                                                                                                                                                                                                                                                                                                                     | Studies published in other languages                                                                                                                                                                                                                                                                                                                     |
| Studies published in the last 20 years                                                                                                                                                                                                                                                                                                                                                                                           | Studies published prior to 20 years ago                                                                                                                                                                                                                                                                                                                  |

## Appendix 2

### Search terms

**Table 2** Medline search terms

| Concept      | Search terms                                                                                                                                                                                                                                                                       |
|--------------|------------------------------------------------------------------------------------------------------------------------------------------------------------------------------------------------------------------------------------------------------------------------------------|
| Care setting | Primary care.mp OR Primary Health Care/ OR After-Hours Care/ OR Out-of-hours.mp OR Emergency care.mp OR Emergency Medical Services/ OR Urgent care.mp OR Ambulatory Care/ or ambulatory care.mp<br>AND                                                                             |
| Triage       | Triage.mp OR Triage/ OR Telephone consultation.mp<br>AND                                                                                                                                                                                                                           |
| Digital      | Digital.mp OR Computer.mp OR Software/ or Software.mp OR Online.mp or Online Systems/ OR Internet.mp or Internet/ OR Web.mp or Web Browser/ OR Computerised.mp OR Computerized.mp OR electronic.mp OR ECDS.mp OR CCDS* OR Decision Support Systems, Clinical/ OR Decision support* |

**Table 3** EMBASE search terms

| Concept      | Search terms                                                                                                                                                                                                                                                               |
|--------------|----------------------------------------------------------------------------------------------------------------------------------------------------------------------------------------------------------------------------------------------------------------------------|
| Care setting | Primary care.mp OR Primary Medical Care/ OR After hours Care/ OR Out-of-hours.mp OR out-of-hours care/ OR Emergency care.mp OR Emergency Health service/ OR emergency care/ OR Urgent care.mp OR Ambulatory Care/ OR ambulatory care.mp AND                                |
| Triage       | Triage.mp OR Telephone consultation.mp OR teleconsultation/ AND                                                                                                                                                                                                            |
| Digital      | Digital.mp OR Computer.mp OR Software/ or Software.mp OR Online.mp or Online System/ OR Internet.mp or Internet/ OR Web.mp or Web Browser/ OR Computerised.mp OR Computerized.mp OR electronic.mp OR ECDS.mp OR CCDS* OR Decision Support Systems / OR Decision support.mp |

**Table 4** CINAHL search terms

| Concept      | Search terms                                                                                                                                                                                                                                                 |
|--------------|--------------------------------------------------------------------------------------------------------------------------------------------------------------------------------------------------------------------------------------------------------------|
| Care setting | 'Primary care' OR (MH 'Primary Health Care') OR 'Out-of-hours' OR 'After-hours care' OR (MH 'Emergency Care') OR 'Emergency care' OR (MH 'Emergency Service') OR 'Urgent care' OR (MH 'Ambulatory Care') OR 'Ambulatory care' AND                            |
| Triage       | (MH 'Triage') OR 'triage' OR 'Telephone consultation' AND                                                                                                                                                                                                    |
| Digital      | 'digital' OR 'Computer' OR (MH 'Software') OR 'software' OR 'Online' OR (MH 'Online Systems') OR (MH 'Internet') OR 'Internet' OR 'web' OR (MH 'Web Browsers') OR 'Computerised' OR 'computerized' OR 'electronic' OR 'ECDS' OR 'CCDS' OR 'Decision support' |

**Table 5** Web of Science search terms

| Concept      | Search terms                                                                                                                                                                |
|--------------|-----------------------------------------------------------------------------------------------------------------------------------------------------------------------------|
| Care setting | 'Primary care' OR 'Primary Health Care' OR 'After-Hours Care' OR Out-of-hours OR 'Emergency care' OR 'Emergency Medical Services' OR 'Urgent care' OR 'Ambulatory Care' AND |
| Triage       | Triage OR 'Telephone consultation' AND                                                                                                                                      |
| Digital      | Digital OR Computer OR Software OR Online OR Internet OR Web OR Computerised OR Computerized OR electronic OR ECDSOR CCDS* OR 'Decision support system'                     |

**Table 6** Scopus search terms

| Concept      | Search terms                                                                                                                                                                               |
|--------------|--------------------------------------------------------------------------------------------------------------------------------------------------------------------------------------------|
| Care setting | 'Primary care' OR 'Primary Health Care' OR 'After-Hours Care' OR 'Out-of-hours' OR 'Emergency care' OR 'Emergency Medical Services' OR 'Urgent care' OR 'Ambulatory Care' AND              |
| Triage       | Triage OR 'Telephone consultation' AND                                                                                                                                                     |
| Digital      | Digital OR Computer OR Software OR Online or 'Online Systems' OR Internet OR Web OR Web Browser OR Computerised OR Computerized OR electronic OR ECDS OR CCDS OR 'Decision support system' |

### Supplementary Information

The online version contains supplementary material available at <https://doi.org/10.1186/s13643-021-01576-x>.

**Additional file 1.** PRISMA-P checklist.

### Abbreviations

CINAHL: Cumulative Index to Nursing and Allied Health Literature; PRISMA: Preferred Reporting Items for Systematic Reviews and Meta-Analyses; PRISMA-P: Preferred Reporting Items for Systematic Reviews and Meta-Analyses Protocols; GP: General Practice; NHS: National Health Service; CDSS: Clinical decision support system; ED: Emergency department; MMAT: Mixed Methods Appraisal Tool

### Acknowledgements

The authors would like to thank Samantha Johnson (Academic Support Librarian, University of Warwick) for the support with developing the search strategy.

### Amendments

This version 4 protocol was updated on 16 December 2020 to clarify the in-hours care setting.

### Authors' contributions

VS developed the first draft of the protocol, with the support of HA and JD. HA and JD reviewed and revised the draft protocol. VS is the guarantor for the review. The author(s) read and approved the final manuscript.

### Funding

This systematic review is part of a PhD that is funded through University of Warwick in collaboration with an industrial partner: Advanced (<https://www.oneadvanced.com/>).

### Availability of data and materials

Not applicable.

### Ethics approval and consent to participate

Not applicable.

### Consent for publication

Not applicable.

### Competing interests

The authors declare that they have no competing interests.

Received: 21 May 2020 Accepted: 2 January 2021

Published online: 13 January 2021

## References

- Huibers L, Smits M, Renaud V, Giesen P, Wensing M. Safety of telephone triage in out-of-hours care: a systematic review. *Scand J Prim Health Care*. 2011;29(4):198–209.
- Tan S, Mays N. Impact of initiatives to improve access to, and choice of, primary and urgent care in England: a systematic review. *Health Policy*. 2014;118(3):304–15.
- Salisbury C, Coulter A. Urgent care and the patient. *Emerg Med J*. 2010; 27(3):181.
- Blakoe M, Gamst-Jensen H, von Euler-Chelpin M, Christensen HC, Moller T. Sociodemographic and health-related determinants for making repeated calls to a medical helpline: a prospective cohort study. *BMJ Open*. 2019;9(7): e030173.
- Elliott AM, McAteer A, Heaney D, Ritchie LD, Hannaford PC. Examining the role of Scotland's telephone advice service (NHS 24) for managing health in the community: analysis of routinely collected NHS 24 data. *BMJ Open*. 2015;5(8):e007293.
- McAteer A, Hannaford PC, Heaney D, Ritchie LD, Elliott AM. Investigating the public's use of Scotland's primary care telephone advice service (NHS 24): a population-based cross-sectional study. *Br J Gen Pract*. 2016;66(646):e337.
- Njeru JW, Damodaran S, North F, Jacobson DJ, Wilson PM, St Sauver JL, et al. Telephone triage utilization among patients with limited English proficiency. *BMC Health Serv Res*. 2017;17(1):706.
- North F, Varkey P, Laing B, Cha SS, Tullidge-Scheitel S. Are e-health web users looking for different symptom information than callers to triage centers? *Telemed J E Health*. 2011;17(1):19–24.
- McKenzie R, Williamson M, Roberts R. Who uses the 'after hours GP helpline'? A profile of users of an after-hours primary care helpline. *Aust Fam Physician*. 2016;45:313–8.
- Bunn F, Byrne G, Kendall S. The effects of telephone consultation and triage on healthcare use and patient satisfaction: a systematic review. *Br J Gen Pract*. 2005;55(521):956.
- Pope C, Turnbull J, Jones J, Prichard J, Rowsell A, Halford S. Has the NHS 111 urgent care telephone service been a success? Case study and secondary data analysis in England. *BMJ Open*. 2017;7(5):e014815.
- Hawkes N. Array of out-of-hours and emergency services is confusing to public, says NHS chief. *BMJ*. 2014;349:g7186.
- Huibers L. Out-of-hours primary care and the quality of telephone triage [PhD Thesis]: Radboud University (Netherlands); 2011. Available from: [https://repository.ubn.ru.nl/bitstream/handle/2066/108927/mmubn00001\\_575475080.pdf](https://repository.ubn.ru.nl/bitstream/handle/2066/108927/mmubn00001_575475080.pdf). Accessed 8 Dec 2020.
- Blank L, Coster J, O'Cathain A, Knowles E, Tosh J, Turner J, et al. The appropriateness of, and compliance with, telephone triage decisions: a systematic review and narrative synthesis. *J Adv Nurs*. 2012;68(12):2610–21.
- Randell. Effects of computerized decision support systems on nursing performance and patient outcomes: a systematic review. *J Health Serv Res Policy*. 2007;12(4):242–51.
- Carrasqueiro S, Oliveira M, Encarnação P. Evaluation of telephone triage and advice services: a systematic review on methods, metrics and results. *Stud Health Technol Inform*. 2011;169:407–11.
- Turner J, O'Cathain A, Nicholl J, Tosh J, Sampson F, Coleman P, Coster J. Evaluation of NHS 111 pilot sites (2012). Available from: [https://www.sheffield.ac.uk/polopoly\\_fs/1.220020/file/NHS\\_111\\_final\\_report\\_August2012.pdf](https://www.sheffield.ac.uk/polopoly_fs/1.220020/file/NHS_111_final_report_August2012.pdf). Accessed 8 Dec 2020.
- Imison C, Castle-Clarke S, Watson R. Reshaping the workforce to deliver the care patients need: Nuffield Trust; 2016. Available from: <https://www.nuffieldtrust.org.uk/files/2017-01/reshaping-the-workforce-case-studies-appendix-web-final.pdf>. Accessed 8 Dec 2020.
- Castle-Clarke. The digital patient: transforming primary care? Nuffield Trust; 2016. Available from: <http://www.digitalfutures.manchester.ac.uk/media/1691/nuffield-report.pdf>. Accessed 8 Dec 2020.
- Chambers D, Cantrell AJ, Johnson M, Preston L, Baxter SK, Booth A, et al. Digital and online symptom checkers and health assessment/triage services for urgent health problems: systematic review. *BMJ Open*. 2019;9(8):e027743.
- NHS-England. NHS 111 online. Available from: <https://111.nhs.uk/>. Accessed 8 Dec 2020.
- Moher D, Shamseer L, Clarke M, Ghersi D, Liberati A, Petticrew M, et al. Preferred Reporting Items for Systematic Review and Meta-Analysis Protocols (PRISMA-P) 2015 statement. *Syst Rev*. 2015;4(1):1.
- Methley AM, Campbell S, Chew-Graham C, McNally R, Cheraghi-Sohi S. PICO, PICOS and SPIDER: a comparison study of specificity and sensitivity in three search tools for qualitative systematic reviews. *BMC Health Serv Res*. 2014;14(1):579.
- Moher D, Liberati A, Tetzlaff J, Altman DG, The PG. Preferred Reporting Items for Systematic Reviews and Meta-Analyses: the PRISMA statement. *PLoS Med*. 2009;6(7):e1000097.
- Hong QN. 'Mixed Methods Appraisal Tool' version 2018 public wiki. Available from: <http://mixedmethodsappraisaltoolpublic.pbworks.com/w/page/24607821/FrontPage>. Accessed 8 Dec 2020.
- Poyay J. Guidance on the conduct of narrative synthesis in systematic reviews. 2006. 30 March 2020. Available from: [https://www.researchgate.net/profile/Mark\\_Rodgers4/publication/233866356\\_Guidance\\_on\\_the\\_conduct\\_of\\_narrative\\_synthesis\\_in\\_systematic\\_reviews\\_A\\_product\\_from\\_the\\_ESRC\\_Methods\\_Programme/links/02e7e5231e8f3a6183000000/Guidance-on-the-conduct-of-narrative-synthesis-in-systematic-reviews-A-product-from-the-ESRC-Methods-Programme.pdf](https://www.researchgate.net/profile/Mark_Rodgers4/publication/233866356_Guidance_on_the_conduct_of_narrative_synthesis_in_systematic_reviews_A_product_from_the_ESRC_Methods_Programme/links/02e7e5231e8f3a6183000000/Guidance-on-the-conduct-of-narrative-synthesis-in-systematic-reviews-A-product-from-the-ESRC-Methods-Programme.pdf).

## Publisher's Note

Springer Nature remains neutral with regard to jurisdictional claims in published maps and institutional affiliations.

**Ready to submit your research? Choose BMC and benefit from:**

- fast, convenient online submission
- thorough peer review by experienced researchers in your field
- rapid publication on acceptance
- support for research data, including large and complex data types
- gold Open Access which fosters wider collaboration and increased citations
- maximum visibility for your research: over 100M website views per year

**At BMC, research is always in progress.**

Learn more [biomedcentral.com/submissions](https://biomedcentral.com/submissions)

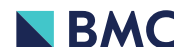

# BMJ Open

## Service use, clinical outcomes and user experience associated with urgent care services that utilise telephone based digital triage: A systematic review

|                                 |                                                                                                                                                                                                                                                       |
|---------------------------------|-------------------------------------------------------------------------------------------------------------------------------------------------------------------------------------------------------------------------------------------------------|
| Journal:                        | <i>BMJ Open</i>                                                                                                                                                                                                                                       |
| Manuscript ID                   | bmjopen-2021-051569.R1                                                                                                                                                                                                                                |
| Article Type:                   | Original research                                                                                                                                                                                                                                     |
| Date Submitted by the Author:   | 08-Oct-2021                                                                                                                                                                                                                                           |
| Complete List of Authors:       | Sexton, Vanashree; University of Warwick<br>Dale, Jeremy; University of Warwick<br>Bryce, Carol; University of Warwick<br>Barry, James; University of Warwick,<br>Sellers, Elizabeth; University of Warwick<br>Atherton, Helen; University of Warwick |
| <b>Primary Subject Heading</b>: | Health services research                                                                                                                                                                                                                              |
| Secondary Subject Heading:      | Health policy                                                                                                                                                                                                                                         |
| Keywords:                       | HEALTH SERVICES ADMINISTRATION & MANAGEMENT, Quality in health care < HEALTH SERVICES ADMINISTRATION & MANAGEMENT, Organisation of health services < HEALTH SERVICES ADMINISTRATION & MANAGEMENT, QUALITATIVE RESEARCH, PUBLIC HEALTH                 |
|                                 |                                                                                                                                                                                                                                                       |

SCHOLARONE™  
Manuscripts



I, the Submitting Author has the right to grant and does grant on behalf of all authors of the Work (as defined in the below author licence), an exclusive licence and/or a non-exclusive licence for contributions from authors who are: i) UK Crown employees; ii) where BMJ has agreed a CC-BY licence shall apply, and/or iii) in accordance with the terms applicable for US Federal Government officers or employees acting as part of their official duties; on a worldwide, perpetual, irrevocable, royalty-free basis to BMJ Publishing Group Ltd ("BMJ") its licensees and where the relevant Journal is co-owned by BMJ to the co-owners of the Journal, to publish the Work in this journal and any other BMJ products and to exploit all rights, as set out in our [licence](#).

The Submitting Author accepts and understands that any supply made under these terms is made by BMJ to the Submitting Author unless you are acting as an employee on behalf of your employer or a postgraduate student of an affiliated institution which is paying any applicable article publishing charge ("APC") for Open Access articles. Where the Submitting Author wishes to make the Work available on an Open Access basis (and intends to pay the relevant APC), the terms of reuse of such Open Access shall be governed by a Creative Commons licence – details of these licences and which [Creative Commons](#) licence will apply to this Work are set out in our licence referred to above.

Other than as permitted in any relevant BMJ Author's Self Archiving Policies, I confirm this Work has not been accepted for publication elsewhere, is not being considered for publication elsewhere and does not duplicate material already published. I confirm all authors consent to publication of this Work and authorise the granting of this licence.

1  
2  
3  
4  
5  
6 **Service use, clinical outcomes and user experience associated with urgent care services that utilise telephone**  
7 **based digital triage: A systematic review**  
8  
9

10  
11  
12  
13  
14 **Authors**  
15

16  
17 Vanashree Sexton, PhD Student. Unit of Academic Primary Care, Warwick Medical School, University of Warwick, UK. Email address:

18  
19 [ash.sexton@warwick.ac.uk](mailto:ash.sexton@warwick.ac.uk) ORCID iD: 0000-0002-6935-016X  
20  
21

22  
23 Dr Jeremy Dale, Professor. Unit of Academic Primary Care, Warwick Medical School, University of Warwick, UK. Email address: [jeremy.dale@warwick.ac.uk](mailto:jeremy.dale@warwick.ac.uk)

24  
25 ORCID iD: 0000-0001-9256-3553  
26  
27

28  
29 Dr Carol Bryce, Research fellow. Unit of Academic Primary Care, Warwick Medical School, University of Warwick, UK. Email address:

30  
31 [c.bryce.1@warwick.ac.uk](mailto:c.bryce.1@warwick.ac.uk) ORCID iD: 0000-0003-1484-9032  
32  
33

34  
35 James Barry, Medical student, Warwick Medical School, University of Warwick, UK. Email address: [james.barry@warwick.ac.uk](mailto:james.barry@warwick.ac.uk)

36  
37 Elizabeth Sellers, Medical student, Warwick Medical School, University of Warwick, UK. Email address: [lizzie.sellers@warwick.ac.uk](mailto:lizzie.sellers@warwick.ac.uk)  
38  
39  
40  
41  
42

1  
2  
3 Dr Helen Atherton, Associate professor. Unit of Academic Primary Care, Warwick Medical School, University of Warwick, UK. Email address:

4  
5 [h.atherton@warwick.ac.uk](mailto:h.atherton@warwick.ac.uk) ORCID iD: 0000-0002-7072-1925  
6  
7

8 **Corresponding Author:** Vanashree Sexton, PhD Student. Unit of Academic Primary Care, Warwick Medical School, University of Warwick, Gibbet Hill,

9  
10 Coventry, CV7 4AL, UK. Email address: [ash.sexton@warwick.ac.uk](mailto:ash.sexton@warwick.ac.uk)  
11  
12

13  
14 **Word count (excluding abstract):**3994  
15  
16

## 17 **Abstract**

18  
19  
20  
21  
22 **Objective** To evaluate service use, clinical outcomes and user experience related to telephone-based digital triage in urgent care.  
23  
24

25 **Design** Systematic review and narrative synthesis.  
26  
27

28 **Data sources** Medline, Embase, CINAHL, Web of Science, and Scopus were searched for literature published between 01 March 2000 – 01 April 2020.  
29  
30

31 **Eligibility criteria for selecting studies** Studies of any design investigating patterns of triage advice, wider service use, clinical outcomes and user experience  
32  
33 relating to telephone based digital triage in urgent care.  
34  
35

36 **Data extraction and synthesis** Two reviewers extracted data and conducted quality assessments using the mixed methods appraisal tool (MMAT). Narrative  
37  
38 synthesis was used to analyse findings.  
39  
40  
41  
42  
43  
44  
45  
46

1  
2  
3 1 **Results** Thirty-one studies were included, with the majority being UK-based; most investigated nurse led digital triage (n=26). Eight evaluated the impact on  
4  
5 2 wider healthcare service use following digital triage implementation, typically reporting reduction or no change in service use. Six investigated patient level  
6  
7 3 service use, showing mixed findings relating to patients' adherence with triage advice. Evaluation of clinical outcomes was limited. Four studies reported on  
8  
9 4 hospitalisation rates of digitally triaged patients and highlighted potential triage errors where patients appeared to have not been given sufficiently high  
10  
11 5 urgency advice. Overall, service users reported high levels of satisfaction, in studies of both clinician and non-clinician led digital triage, but with some  
12  
13 6 dissatisfaction over the relevance and number of triage questions.  
14  
15  
16

17 7 **Conclusions** Further research is needed into patient level service use, including patients' adherence with triage advice and how this influences subsequent  
18  
19 8 use of services. Further evaluation of clinical outcomes using larger datasets and comparison of different digital triage systems is needed to explore  
20  
21 9 consistency and safety. The safety and effectiveness of non-clinician led digital triage also needs evaluation. Such evidence should contribute to  
22  
23 10 improvement of digital triage tools and service delivery.  
24  
25  
26

27 11 **PROSPERO registration number** 2020 CRD42020178500  
28  
29  
30

## 31 **Strengths and limitations of this study**

32  
33

- 34 13 • This is the first systematic review to focus on the use of telephone based digital triage in urgent care  
35  
36 14 • This comprehensive, mixed methods review covers a 20-year period, enabling evaluation of older literature prior to shifts of some services to non-  
37  
38 15 clinician led models of service delivery  
39  
40  
41  
42  
43  
44  
45  
46



- 1
- 2
- 3 1 • Outcomes relating to cost effectiveness, and staff focussed outcomes were not within the review scope.
- 4
- 5 2 • The review was limited to studies published in English, which may have led to some evidence being overlooked
- 6
- 7
- 8
- 9 3
- 10
- 11

## 12 4 Background

13

14 5

15

16 6 Telephone based digital triage is widely used in urgent care(1, 2). Urgent care is the “the range of responses that health and care services provide to people

17

18 7 who require – or who perceive the need for – urgent advice, treatment or diagnosis”(3), and includes national or regional help-lines, out of hours centres

19

20 8 and emergency care providers.

21

22

23 9 Digital triage involves a call handler or clinician using a digital triage tool to generate advice based on an assessment of a patient’s symptoms. Advice

24

25 10 typically takes the form of signposting within defined levels of urgency to specific local services, such as an emergency department (ED), out of hours centre

26

27 11 or general practice (GP) appointment; in some cases self-care advice is given.

28

29

30

31 12 Digital triage service delivery models vary widely. In England and Scotland digital triage is delivered by non-clinical call handlers, for example through the

32

33 13 111 service, which operates 24/7, whilst in most other countries it is predominantly clinician (nurse) led(4-9). In part, digital triage has been implemented in

34

35 14 response to increasing demand on primary care and EDs in the last several decades(10).

36

37

38

39

40

41

42

43

44

45

46

1  
2  
3 1 Despite wide adoption over the last several decades, there is limited evaluation of its impact on wider healthcare service use, clinical outcomes and user  
4  
5 2 experience. No previous systematic reviews have focussed solely on services that utilise digital triage; instead reviewing telephone consultation and triage  
6  
7 3 more broadly, including services that use digital triage and those that are not digitally supported(1, 10, 11).  
8  
9

10  
11 4 One review indicated that 50% of calls in the general healthcare setting (with studies predominantly conducted in primary care settings) could be handled  
12  
13 5 completely over the telephone, showing the potential of telephone triage to manage face to face care demand(10). However, there are mixed findings  
14  
15 6 relating to wider healthcare service use and very limited investigation of clinical outcomes(10). A previous review reported a high level of user  
16  
17 7 satisfaction(10), while another highlighted that satisfaction with advice related to improved compliance with advice(11).  
18  
19

20  
21 8 Given technological development and, in some cases, the reorganisation of services in recent years(2), systematic reviews conducted several years ago  
22  
23 9 (between 2005 and 2012)(1, 10-13) may have limited relevance to today's services.  
24  
25

26 10 This review addresses the need for an up-to date evaluation of telephone-based digital triage within urgent care. It aims to evaluate wider health care  
27  
28 11 service use, clinical outcomes and user experience in a range of in hours and out of hours urgent care settings in order to identify areas for improvement  
29  
30 12 and the need for further research.  
31  
32

33 13  
34

35 14  
36  
37  
38  
39  
40  
41  
42  
43  
44  
45  
46

## 1 Method

2

3 This review uses a mixed methods design and is reported according to the Preferred Reporting Items for Systematic Reviews and Meta-Analyses (PRISMA)  
4 framework(14). See appendix 1 for the PRISMA checklist. The published protocol (<https://rdcu.be/cdwOD>)(15) was followed and is registered on  
5 PROSPERO (2020 CRD42020178500).

6

## 7 Patient and public involvement (PPI)

8

9 No PPI directly fed into the development or conduct of this review.

10

## 11 Eligibility criteria

12

13 Eligibility criteria have been developed using the population, interventions, comparators, outcomes and study designs (PICOS) principle (16):

14 1. *Population*: studies that evaluated digital triage in the general population or within population sub-groups (for example older people).

15 2. *Interventions*: studies that assessed telephone based digital triage, which met all of the below criteria:

16 a. In services providing urgent care (excluding in-hours general practice)

- 1
- 2
- 3 1 b. That was used by the general population (not condition specific services);
- 4
- 5 2 c. That result in signposting advice (referral to a local service, such as ED, GP, ambulance dispatch, and in some cases self-care advice)
- 6
- 7
- 8 3 3. Outcomes: studies that evaluated at least one of the following: characteristics of service users and triage advice; healthcare service use following
- 9
- 10 4 triage; clinical outcomes (including hospitalisations and mortality); and service user experience.
- 11
- 12

13 5 All empirical study types published between 01 March 2000 – 01 April 2020 in English were included: qualitative, quantitative and mixed methods studies.

14

15

16 6

17

18

## 19 7 **Search strategy**

20

21 8

22

23 9 The search strategy was designed with support from a librarian. Searches were conducted in Medline, Embase, CINAHL, Web of Science, and Scopus. Terms

24

25 10 relating to digital triage and urgent care settings (excluding in-hours general practice) were used. See Medline search terms in appendix 2. The search was

26

27 11 restricted to studies published in English, including electronically published (Epub) studies ahead of print. Reference hand-searches were conducted for all

28

29

30 12 included full texts.

31

32

33 13

## 34

## 35 14 **Study selection and data extraction**

36

37 15

38

39

40

41

42

43

44

45

46

1  
2  
3 1 Articles were de-duplicated ahead of study selection. Two reviewers screened studies independently at title and abstract stage and at full text stage using  
4  
5 2 Covidence software. Any disagreements were resolved through discussion between the reviewers; where necessary a third reviewer was consulted. A  
6  
7 3 PRISMA flow chart was is presented in the results.  
8  
9  
10 4 A data extraction form was developed and initially piloted on three studies to confirm that key elements of studies were captured. See appendix 3 for data  
11  
12 5 extraction fields. Data were extracted independently by two reviewers, and any discrepancies were resolved through discussion with a third reviewer. Study  
13  
14 6 authors were contacted in cases where clarifications regarding study conduct were required.  
15  
16  
17  
18 7  
19  
20

## 21 8 **Quality assessment**

22 9  
23  
24 10 Quality assessment, including risk of bias, was conducted by two reviewers using the Mixed Methods Appraisal Tool (MMAT)(17), which enables the  
25  
26 11 assessment of mixed study types. The assessment was used to provide context, rather than to exclude studies(18). Based on the number of MMAT criteria  
27  
28 12 met, studies were categorised as high (if all five MMAT criteria were met), medium (if 3 or 4 criteria were met) or low quality (if 2 or less criteria were met).  
29  
30  
31

## 32 13 **Data synthesis**

33 14  
34  
35  
36 15 Narrative synthesis(18) was used due to the diversity of designs in the included studies. This included: generating a preliminary synthesis, exploring  
37  
38 16 relationships in findings across studies, assessing the robustness of the evidence and summarising findings(18). Statistical meta-analysis was not possible  
39  
40  
41  
42  
43  
44  
45  
46

1 due to the heterogeneity of the included studies. Key findings within and between studies were grouped by outcome and visually summarised using a  
2 subgroup analyses method(18), which we modified to additionally present the strength of evidence. Where a visual summary was not possible due to  
3 heterogeneity of outcomes, findings were summarized in text.

4

## 5 Results

6

7 The search resulted in 6921 records, after duplicates were removed, there were 5010 records to screen at title and abstract level; 102 records were  
8 included for full text screening, out of which 31 studies were included. See figure 1 for PRISMA flowchart.

9 Most included studies were of quantitative design (n=25)(5, 7, 19-41) including: routine data analyses(n=16)(5, 7, 19-25, 27, 29, 34, 35, 37-39),  
10 surveys(n=6)(26, 28, 31, 33, 40, 41), controlled trials (n=2)(30, 36), and a quantitative descriptive study (n=1)(32). There were fewer qualitative (n=4)(42-45)  
11 and mixed methods studies (n=2)(6, 46).

12 Studies were mainly from the UK (n=17)(5, 6, 20, 21, 23, 26-29, 32, 36-38, 40, 42, 43, 46), with small numbers from Sweden (n=4)(41, 44, 45, 47), Australia  
13 (n=4)(30, 31, 34, 39), USA (n=3)(7, 19, 22), Netherlands (n=2)(25, 33), Japan (n=1)(35) and Portugal (n=1)(24). Most included the full range of service users  
14 (n=24)(5, 6, 19, 21-26, 28, 30, 32-36, 38-41, 43-46), but some focussed on subsets: older adults(21, 24), younger age groups(20, 37), parents of children(31),  
15 men(42) or adults with limited English proficiency(LEP)(7).

1 Most studies evaluated digital triage conducted by nurses (n=26)(5, 7, 19-34, 37, 39, 41-46), but some included non-clinicians (n=3)(6, 38, 40), nurses and  
 2 paramedics (n= 1)(36), or nurses and non-clinical call handler (n=1)(35).

3 Most studies were of identifiable call centre-based services: England’s former NHS Direct(20, 21, 23, 26, 28, 29, 37, 42-44, 46) and current NHS 111  
 4 service(38, 40), Scotland’s NHS24(5, 6), USA’s MayoClinic(7, 19, 22), Portugal’s Linha Saude 24(24), Swedish Health Direct(41, 44, 45), Australia’s Health  
 5 Direct(34). A few involved smaller scale ‘unnamed’ implementations (30, 39) or general practice cooperatives(25, 32, 33). Two were based in the emergency  
 6 setting, one within an English ambulance service(36) and one within an emergency telephone service in Japan(35). Table 1 shows characteristics of studies.  
 7 Nineteen studies were rated as being of high quality(5-7, 21, 23-26, 29, 33, 34, 36-39, 42-45), eleven medium(19, 20, 22, 27, 28, 30-32, 35, 40, 41) and one  
 8 was low(46). Qualitative studies tended to be of higher quality, whilst quantitative studies were more variable. Reasons for lower quality amongst  
 9 quantitative studies included inadequate description of accounting for confounders (28, 30, 34, 35) and risk of non-response bias (31, 40, 41, 48). One  
 10 mixed methods study did not adequately describe integration of qualitative and quantitative components (46). In two of the qualitative studies details  
 11 about how the findings were derived from the data could have been expanded (43, 45). The quality assessment results are included in appendix 4.

12 **Table 1: Characteristics of included studies (31 studies)**

| Main outcome area | Author Year Country Reference | Study design | Sample / data size | Urgent or Emergency care | Staff type conducting triage | Participants & service name | Comparator | Quality |
|-------------------|-------------------------------|--------------|--------------------|--------------------------|------------------------------|-----------------------------|------------|---------|
|-------------------|-------------------------------|--------------|--------------------|--------------------------|------------------------------|-----------------------------|------------|---------|

|                        |                                          |                                                                                                          |                                                                                                                                                                                                  |        |                              |                                                          |                                                                                                                         |        |
|------------------------|------------------------------------------|----------------------------------------------------------------------------------------------------------|--------------------------------------------------------------------------------------------------------------------------------------------------------------------------------------------------|--------|------------------------------|----------------------------------------------------------|-------------------------------------------------------------------------------------------------------------------------|--------|
| <b>User experience</b> | Björkman<br>2018<br>Sweden<br><br>(44)   | Qualitative:<br>'Netnographic'<br>method using<br>information<br>from online<br>forums using<br>six step | Data collected<br>from 3 online<br>forums                                                                                                                                                        | Urgent | Nurse                        | General<br>population                                    | None                                                                                                                    | High   |
| <b>User experience</b> | O'Cathain<br>2014<br>England<br><br>(40) | Quantitative:<br>Survey                                                                                  | Survey sent to<br>1200 patients<br>from 4 pilot sites,<br>1769 responded<br>and were<br>included for<br>analysis                                                                                 | Urgent | Non-clinical call<br>handler | General<br>population                                    | None                                                                                                                    | Medium |
| <b>User experience</b> | McAteer<br>2016<br>Scotland<br><br>(6)   | Mixed<br>methods:<br>survey and<br>interviews                                                            | Survey: Age and<br>sex-stratified<br>random sample<br>of 256 adults<br>from each of 14<br>Scottish GP<br>surgeries, final<br>sample was 1190.<br>Interviews: 30<br>semi-structured<br>interviews | Urgent | Non-clinical call<br>handler | General<br>population (NHS<br>24 users and<br>non-users) | Interviewees<br>(from survey<br>respondents)<br>grouped into<br>satisfied users,<br>dissatisfied users<br>and non-users | High   |



|                        |                                         |                                        |                                                                                        |        |       |                                  |                                                                                                                                                                                                                                              |        |
|------------------------|-----------------------------------------|----------------------------------------|----------------------------------------------------------------------------------------|--------|-------|----------------------------------|----------------------------------------------------------------------------------------------------------------------------------------------------------------------------------------------------------------------------------------------|--------|
| <b>User experience</b> | Rahmqvist<br>2011<br>Sweden<br><br>(41) | Quantitative:<br><br>Survey            | Random sample<br>of 660 callers,<br>made at one call<br>centre site in<br>October 2008 | Urgent | Nurse | General<br>population            | 1) Cases: those<br>who disagreed<br>with nurse advice<br>and felt they<br>needed higher<br>level of care; 2)<br>Controls: those<br>who disagreed<br>with nurse advice<br>OR felt they<br>needed higher<br>level of care; 3)<br>other callers | Medium |
| <b>User experience</b> | Goode<br>2004<br>England (43)           | Qualitative:<br><br>Interview<br>study | 60 interviews                                                                          | Urgent | Nurse | General<br>population            | None                                                                                                                                                                                                                                         | High   |
| <b>User experience</b> | Winneby<br>2014<br>Sweden<br><br>(45)   | Qualitative:<br><br>Interview<br>study | 8 semi-structured<br>interviews                                                        | Urgent | Nurse | General<br>population            | None                                                                                                                                                                                                                                         | High   |
| <b>User experience</b> | Goode<br>2004<br>England                | Qualitative:<br><br>Interview<br>study | 10 semi-<br>structured<br>interviews                                                   | Urgent | Nurse | Interviews<br>focussed on<br>men | None                                                                                                                                                                                                                                         | High   |

1  
2  
3  
4  
5  
6  
7  
8  
9  
10  
11  
12  
13  
14  
15  
16  
17  
18  
19  
20  
21  
22  
23  
24  
25  
26  
27  
28  
29  
30  
31  
32  
33  
34  
35  
36  
37  
38  
39  
40  
41  
42  
43  
44  
45  
46

|                                  |                                               |                          |                           |        |                                            |                                                                                         |                                                                                      |      |
|----------------------------------|-----------------------------------------------|--------------------------|---------------------------|--------|--------------------------------------------|-----------------------------------------------------------------------------------------|--------------------------------------------------------------------------------------|------|
|                                  | (42)                                          |                          |                           |        |                                            |                                                                                         |                                                                                      |      |
| <b>Patterns of triage advice</b> | Payne<br>2001<br>England<br><br>(23)          | Routine data<br>analysis | 56,450 calls              | Urgent | Nurse                                      | General<br>population                                                                   | None -<br>Comparisons<br>within digital<br>triage call data                          | High |
| <b>Patterns of triage advice</b> | Elliot<br>2015<br>Scotland<br><br>(5)         | Routine data<br>analysis | 1,285,038 calls           | Urgent | Nurse                                      | General<br>population                                                                   | None -<br>Comparisons<br>within digital<br>triage call data                          | High |
| <b>Patterns of triage advice</b> | Zwaanswijk<br>2015<br>Netherlands<br><br>(25) | Routine data<br>analysis | 895 253 patients          | Urgent | Nurse (general<br>practice<br>cooperative) | General<br>population                                                                   | Some comparison<br>with non-digital<br>triage                                        | High |
| <b>Patterns of triage advice</b> | Njeru<br>2017<br>USA<br><br>(7)               | Routine data<br>analysis | 587 cases<br>587 controls | Urgent | Nurse                                      | Those aged over<br>18 - (callers with<br>and without<br>limited English<br>proficiency) | Patients with<br>limited English<br>proficiency<br>compared to<br>English proficient | High |
| <b>Patterns of triage advice</b> | Jacome<br>2018<br>Portugal<br><br>(24)        | Routine data<br>analysis | 148,099 calls             | Urgent | Nurse                                      | General<br>population<br>(Older age<br>groups 65+)                                      | None -<br>Comparisons<br>within digital<br>triage call data                          | High |

|    |                                  |                                  |                       |                                                                                                                              |        |       |                                                            |                                                                                                                                         |        |
|----|----------------------------------|----------------------------------|-----------------------|------------------------------------------------------------------------------------------------------------------------------|--------|-------|------------------------------------------------------------|-----------------------------------------------------------------------------------------------------------------------------------------|--------|
| 1  |                                  |                                  |                       |                                                                                                                              |        |       |                                                            |                                                                                                                                         |        |
| 2  |                                  |                                  |                       |                                                                                                                              |        |       |                                                            |                                                                                                                                         |        |
| 3  |                                  |                                  |                       |                                                                                                                              |        |       |                                                            |                                                                                                                                         |        |
| 4  | <b>Patterns of triage advice</b> | Hsu 2011<br>England<br><br>(21)  | Routine data analysis | 402,959 calls                                                                                                                | Urgent | Nurse | Older age groups (aged over 65 years)                      | None                                                                                                                                    | High   |
| 5  |                                  |                                  |                       |                                                                                                                              |        |       |                                                            |                                                                                                                                         |        |
| 6  |                                  |                                  |                       |                                                                                                                              |        |       |                                                            |                                                                                                                                         |        |
| 7  |                                  |                                  |                       |                                                                                                                              |        |       |                                                            |                                                                                                                                         |        |
| 8  |                                  |                                  |                       |                                                                                                                              |        |       |                                                            |                                                                                                                                         |        |
| 9  |                                  |                                  |                       |                                                                                                                              |        |       |                                                            |                                                                                                                                         |        |
| 10 | <b>Patterns of triage advice</b> | Cook 2013<br>England<br><br>(20) | Routine data analysis | 358 503 calls                                                                                                                | Urgent | Nurse | children aged 0–15 (<1, 1–3 and 4–15 years))               | Comparisons between age groups                                                                                                          | Medium |
| 11 |                                  |                                  |                       |                                                                                                                              |        |       |                                                            |                                                                                                                                         |        |
| 12 |                                  |                                  |                       |                                                                                                                              |        |       |                                                            |                                                                                                                                         |        |
| 13 |                                  |                                  |                       |                                                                                                                              |        |       |                                                            |                                                                                                                                         |        |
| 14 |                                  |                                  |                       |                                                                                                                              |        |       |                                                            |                                                                                                                                         |        |
| 15 |                                  |                                  |                       |                                                                                                                              |        |       |                                                            |                                                                                                                                         |        |
| 16 |                                  |                                  |                       |                                                                                                                              |        |       |                                                            |                                                                                                                                         |        |
| 17 | <b>Patterns of triage advice</b> | North 2010<br>USA<br><br>(22)    | Routine data analysis | 20,230 calls                                                                                                                 | Urgent | Nurse | General population (those with subscription and insurance) | Three comparison groups:<br>1. Triage callers; 2. ED attendances 3. Office (GP) visits. (Comparison of hospitalisation in these groups) | Medium |
| 18 |                                  |                                  |                       |                                                                                                                              |        |       |                                                            |                                                                                                                                         |        |
| 19 |                                  |                                  |                       |                                                                                                                              |        |       |                                                            |                                                                                                                                         |        |
| 20 |                                  |                                  |                       |                                                                                                                              |        |       |                                                            |                                                                                                                                         |        |
| 21 |                                  |                                  |                       |                                                                                                                              |        |       |                                                            |                                                                                                                                         |        |
| 22 |                                  |                                  |                       |                                                                                                                              |        |       |                                                            |                                                                                                                                         |        |
| 23 |                                  |                                  |                       |                                                                                                                              |        |       |                                                            |                                                                                                                                         |        |
| 24 |                                  |                                  |                       |                                                                                                                              |        |       |                                                            |                                                                                                                                         |        |
| 25 |                                  |                                  |                       |                                                                                                                              |        |       |                                                            |                                                                                                                                         |        |
| 26 |                                  |                                  |                       |                                                                                                                              |        |       |                                                            |                                                                                                                                         |        |
| 27 |                                  |                                  |                       |                                                                                                                              |        |       |                                                            |                                                                                                                                         |        |
| 28 |                                  |                                  |                       |                                                                                                                              |        |       |                                                            |                                                                                                                                         |        |
| 29 | <b>Patterns of triage advice</b> | North 2011<br>USA<br><br>(19)    | Routine data analysis | Over the three-year period: 105,866 adult calls (65% of the total calls). Of these, 14,646 (14%) were made by a surrogate on | Urgent | Nurse | General population (aged over 18)                          | Surrogate vs. self calls                                                                                                                | Medium |
| 30 |                                  |                                  |                       |                                                                                                                              |        |       |                                                            |                                                                                                                                         |        |
| 31 |                                  |                                  |                       |                                                                                                                              |        |       |                                                            |                                                                                                                                         |        |
| 32 |                                  |                                  |                       |                                                                                                                              |        |       |                                                            |                                                                                                                                         |        |
| 33 |                                  |                                  |                       |                                                                                                                              |        |       |                                                            |                                                                                                                                         |        |
| 34 |                                  |                                  |                       |                                                                                                                              |        |       |                                                            |                                                                                                                                         |        |
| 35 |                                  |                                  |                       |                                                                                                                              |        |       |                                                            |                                                                                                                                         |        |
| 36 |                                  |                                  |                       |                                                                                                                              |        |       |                                                            |                                                                                                                                         |        |
| 37 |                                  |                                  |                       |                                                                                                                              |        |       |                                                            |                                                                                                                                         |        |
| 38 |                                  |                                  |                       |                                                                                                                              |        |       |                                                            |                                                                                                                                         |        |
| 39 |                                  |                                  |                       |                                                                                                                              |        |       |                                                            |                                                                                                                                         |        |
| 40 |                                  |                                  |                       |                                                                                                                              |        |       |                                                            |                                                                                                                                         |        |
| 41 |                                  |                                  |                       |                                                                                                                              |        |       |                                                            |                                                                                                                                         |        |
| 42 |                                  |                                  |                       |                                                                                                                              |        |       |                                                            |                                                                                                                                         |        |
| 43 |                                  |                                  |                       |                                                                                                                              |        |       |                                                            |                                                                                                                                         |        |
| 44 |                                  |                                  |                       |                                                                                                                              |        |       |                                                            |                                                                                                                                         |        |
| 45 |                                  |                                  |                       |                                                                                                                              |        |       |                                                            |                                                                                                                                         |        |
| 46 |                                  |                                  |                       |                                                                                                                              |        |       |                                                            |                                                                                                                                         |        |

|                                     |                                         |                                                                           |                                                                                                                   |           |                                                     |                                                                                                                               |                                                                                                                |        |
|-------------------------------------|-----------------------------------------|---------------------------------------------------------------------------|-------------------------------------------------------------------------------------------------------------------|-----------|-----------------------------------------------------|-------------------------------------------------------------------------------------------------------------------------------|----------------------------------------------------------------------------------------------------------------|--------|
|                                     |                                         |                                                                           | behalf of the patient.                                                                                            |           |                                                     |                                                                                                                               |                                                                                                                |        |
| <b>Service use following triage</b> | Lattimer<br>2000<br>England<br><br>(32) | Quantitative descriptive: Cost effectiveness report from controlled trial | >14000<br>Control group (n = 7308 calls)<br>Intervention group i.e. Nurse telephone consultation (n=7184 calls)   | Urgent    | Nurse (within general practice cooperative)         | General population                                                                                                            | Usual care (referral to a GP) compared to nurse led digital triage                                             | Medium |
| <b>Service use following triage</b> | Munro<br>2000<br>England<br><br>(29)    | Routine data analysis                                                     | Study corresponds to the 1st year of operation, where 68 500 NHS direct calls from the 1.3 million people served. | Urgent    | Nurse                                               | All contacts with these immediate care services (at time spanning before and after introduction of call centre based service) | Service use in regions where digital triage service was introduced, compared to regions with no implementation | High   |
| <b>Service use following triage</b> | Dale<br>2003<br>England<br><br>(36)     | Controlled trial                                                          | 635 triaged calls<br>611 non-triaged calls                                                                        | Emergency | Nurse and paramedic (within emergency control room) | General population, calling the emergency service for non-emergency                                                           | The control group not offered triage was compared with calls digitally triaged either by nurses or paramedics. | High   |

|                                     |                                            |                                                    |                                                                                                 |        |       |                                                                                   |                                                                                                                                                                                  |        |
|-------------------------------------|--------------------------------------------|----------------------------------------------------|-------------------------------------------------------------------------------------------------|--------|-------|-----------------------------------------------------------------------------------|----------------------------------------------------------------------------------------------------------------------------------------------------------------------------------|--------|
|                                     |                                            |                                                    |                                                                                                 |        |       | concerns (only those aged 2+)                                                     |                                                                                                                                                                                  |        |
| <b>Service use following triage</b> | Foster<br>2003<br>England<br><br>(27)      | Routine data analysis & data linkage               | 4493 calls, of which 193 were advised to go to ED                                               | Urgent | Nurse | General population                                                                | Three comparison groups:<br>1. Callers triaged to A&E who attended<br>2. Callers triaged to A&E who did not attend<br>3. Callers with different triage outcome who attended A&E. | Medium |
| <b>Service use following triage</b> | Mark<br>2003<br>England<br><br>(46)        | Mixed methods (routine data analysis + interviews) | Numbers of calls analysed across three years:<br>5126 (year 1998)<br>5702 (1999)<br>4698 (2000) | Urgent | Nurse | General population                                                                | n/a                                                                                                                                                                              | Low    |
| <b>Service use following triage</b> | Sprivulis<br>2004<br>Australia<br><br>(34) | Routine data analysis & data linkage               | 13 019 presentations to ED of which 842 were identified as having contacted Health- Direct      | Urgent | Nurse | General population - all patients who contacted the digital triage service during | 1. Patients who were digitally triaged prior to attending ED                                                                                                                     | High   |

|                                     |                          |                                                                         |                                                                                                                                   |        |       |                                                                                               |                                                                                                                                             |        |
|-------------------------------------|--------------------------|-------------------------------------------------------------------------|-----------------------------------------------------------------------------------------------------------------------------------|--------|-------|-----------------------------------------------------------------------------------------------|---------------------------------------------------------------------------------------------------------------------------------------------|--------|
|                                     |                          |                                                                         | within the 24 h period prior to presentation.                                                                                     |        |       | the one year study period                                                                     | 2. Patients who were not digitally triaged                                                                                                  |        |
| <b>Service use following triage</b> | Dunt 2005 Australia (30) | Quantitative: four trials including surveys (self-reported service use) | Random sampling (350 households per trial site)                                                                                   | Urgent | Nurse | General population                                                                            | 2 sites using "standalone" telephone triage which used "call centre software" 2 embedded telephone triage sites using paper based protocols | Medium |
| <b>Service use following triage</b> | Munro 2005 England (28)  | Quantitative: Surveys (care providers)                                  | 571 surveys sent (188/297) responses from GP cooperatives, (35/35) for ambulance services and (200/239) for emergency departments | Urgent | Nurse | Surveys sent to care providers (general use of services following NHS direct implementations) | n/a                                                                                                                                         | Medium |

1  
2  
3  
4  
5  
6  
7  
8  
9  
10  
11  
12  
13  
14  
15  
16  
17  
18  
19  
20  
21  
22  
23  
24  
25  
26  
27  
28  
29  
30  
31  
32  
33  
34  
35  
36  
37  
38  
39  
40  
41  
42  
43  
44  
45  
46

1  
2  
3  
4  
5  
6  
7  
8  
9  
10  
11  
12  
13  
14  
15  
16  
17  
18  
19  
20  
21  
22  
23  
24  
25  
26  
27  
28  
29  
30  
31  
32  
33  
34  
35  
36  
37  
38  
39  
40  
41  
42  
43  
44  
45  
46

|                                     |                                        |                                      |                                                                              |           |                        |                                                                                  |                                                                                                                                                                                                                                          |        |
|-------------------------------------|----------------------------------------|--------------------------------------|------------------------------------------------------------------------------|-----------|------------------------|----------------------------------------------------------------------------------|------------------------------------------------------------------------------------------------------------------------------------------------------------------------------------------------------------------------------------------|--------|
| <b>Service use following triage</b> | Stewart<br>2006<br>England<br><br>(37) | Routine data analysis & data linkage | 3312 calls to call centre based service, and 14,029 patients who attended ED | Urgent    | Nurse                  | Children and young adults aged under 16                                          | 1) Patients advised through digital triage to attend ED<br><br>2) Patients given alternative referral advice, through digital triage, but who still attended ED<br>3. Patients referred to ED by their GP<br><br>4. Self-referrals to ED | High   |
| <b>Service use following triage</b> | Byrne<br>2007<br>England<br><br>(26)   | Quantitative: Survey                 | 268 callers                                                                  | Urgent    | Nurse                  | General public with 3 symptom types (abdominal pain or cough and/or sore throat) | None                                                                                                                                                                                                                                     | High   |
| <b>Service use following triage</b> | Morimura<br>2010<br>Japan<br><br>(35)  | Routine data analysis                | 26,138 telephone consultations                                               | Emergency | Nurse and call handler | General population                                                               | None                                                                                                                                                                                                                                     | Medium |

|                                                                            |                                     |                                            |                                            |                                                                                            |        |       |                                                                                    |                                                                                                                                       |        |
|----------------------------------------------------------------------------|-------------------------------------|--------------------------------------------|--------------------------------------------|--------------------------------------------------------------------------------------------|--------|-------|------------------------------------------------------------------------------------|---------------------------------------------------------------------------------------------------------------------------------------|--------|
| 1<br>2<br>3<br>4<br>5<br>6<br>7<br>8<br>9<br>10<br>11                      | <b>Service use following triage</b> | Huibers<br>2013<br>Netherlands<br><br>(33) | Quantitative:<br>Questionnaires            | 7039<br>questionnaires<br>returned (from a<br>total of 13,953<br>sent)                     | Urgent | Nurse | General<br>population<br>(users who had<br>a telephone<br>contact with a<br>nurse) | None                                                                                                                                  | High   |
| 12<br>13<br>14<br>15<br>16<br>17<br>18<br>19<br>20<br>21<br>22             | <b>Service use following triage</b> | Turner<br>2013<br>England<br><br>(38)      | Routine data<br>analysis                   | 400,000 calls to<br>call centre based<br>service in first<br>year of operation<br>analysed | Urgent | Nurse | General<br>population                                                              | Matched sites:<br>1. Intervention<br>sites: four digital<br>pilot sites<br>2. Control sites<br>(North of Tyne,<br>Leicester, Norfolk) | High   |
| 23<br>24<br>25<br>26<br>27<br>28<br>29<br>30<br>31<br>32<br>33             | <b>Service use following triage</b> | Turbitt<br>2015<br>Australia<br><br>(31)   | Quantitative:<br>Surveys                   | 1150 parents<br>attending ED<br>(decline rate<br>19.9%)                                    | Urgent | Nurse | Specific group                                                                     | Some<br>comparisons<br>between parents<br>who called and<br>did not call but<br>prior to attending<br>ED                              | Medium |
| 34<br>35<br>36<br>37<br>38<br>39<br>40<br>41<br>42<br>43<br>44<br>45<br>46 | <b>Service use following triage</b> | Siddiqui<br>2019<br>Australia              | Routine data<br>analysis & data<br>linkage | 12,741 triaged<br>cases linked to<br>72,577 ED<br>presentations                            | Urgent | Nurse | General<br>population                                                              | n/a                                                                                                                                   | High   |



1  
2  
3  
4  
5  
6  
7  
8  
9  
10  
11  
12  
13  
14  
15  
16  
17  
18  
19  
20  
21  
22  
23  
24  
25  
26  
27  
28  
29  
30  
31  
32  
33  
34  
35  
36  
37  
38  
39  
40  
41  
42  
43  
44  
45  
46

|  |      |  |  |  |  |  |  |  |  |
|--|------|--|--|--|--|--|--|--|--|
|  | (39) |  |  |  |  |  |  |  |  |
|--|------|--|--|--|--|--|--|--|--|

1  
2

For peer review only

1  
2  
3  
4  
5  
6  
7  
8  
9  
10  
11  
12  
13  
14  
15  
16  
17  
18  
19  
20  
21  
22  
23  
24  
25  
26  
27  
28  
29  
30  
31  
32  
33  
34  
35  
36  
37  
38  
39  
40  
41  
42  
43  
44  
45  
46  
47  
48  
49  
50  
51  
52  
53  
54  
55  
56  
57  
58  
59  
60

## Patterns of use:

Nine studies focused on patterns of triage advice; all utilised routine datasets(5, 7, 19-25). Key findings are summarised below; detailed findings from studies are in supplementary table 1.

## Characteristics of patients and callers

Presenting symptoms with highest frequency amongst patients, included: abdominal or digestive problems, 6.8% - 12.2% of calls(5, 19, 22, 24, 39); and respiratory problems, 11.3%(39) to 11.9%(24), of calls. The majority of calls were made by women (range: 59%-72%)(5, 19, 22-24, 39).

Calls about patients in younger age groups(22, 23) made up a comparatively high proportions of calls; 24% of calls were for 0 – 5 year olds in one study(23) and another reported 15% of out of hours calls being for 0-4 year olds(5).

## *User characteristics and triage advice urgency*

Factors associated with triage advice urgency included:

1) Patient's age: two studies reported urgency to be lower in children and younger age groups(23) (20); one study reported a high proportion (47%) of calls about children aged (0 – 15) were resolved through self-care advice or health information(20). Two studies reported that urgency increased with age(19, 24).

2) Sex: two studies reported women were more likely to receive lower urgency advice as compared to men; however, neither controlled for age or presenting symptoms(21, 23), one suggested this may be explained by women seeking care advice earlier, before their symptoms progress and become more urgent(21).

1  
2  
3 1 3) Symptoms: two studies reported symptoms associated with higher urgency advice(20, 25); for  
4  
5 2 example, calls about children with respiratory problems were more likely to be referred to  
6  
7 3 emergency care as compared to other symptom types(20).  
8  
9  
10 4 4) Caller language proficiency: one case-control study reported that adults with limited English  
11  
12 5 language proficiency (LEP) were more likely to receive higher urgency advice (ambulance, immediate  
13  
14 6 ED attendance or urgent visit) (49.4% versus 39.0%;  $P < 0.0004$ )(7); groups in this study were  
15  
16 7 balanced based on age and sex and co-morbidities were controlled for(7).  
17  
18  
19  
20  
21 8

## 9 **Service use and clinical outcomes following triage**

### 10 *Change in service use following digital triage implementation*

11  
12  
13 Eight studies reported on change in wider health care service use (primary care, ED use, ambulance  
14  
15 use, and emergency admissions) following implementation of digital triage(28-30, 32, 35, 36, 38, 46).  
16  
17 Of these, one investigated non-clinician led triage(38). Comparators included: rates of service use in  
18  
19 patients receiving usual care (e.g. GP referral) in comparison to those who were digitally triaged(32,  
20  
21 36); service use rates prior to implementation(28, 30, 35, 46); comparator regions with no digital  
22  
23 triage implementation(29, 38); and national service use comparator(30).  
24  
25

19 There were mixed findings across studies, as visually summarised in figure 2. Most reported  
20  
21 reduction or no change in wider service use after implementation; there were two exceptions, which  
22  
23 both evaluated clinician (nurse) led digital triage: one (rated as being a lower quality study) reported  
24  
25 an increase in ED use(46). The other reported some increase in out of hours service use (GP clinic  
use and home visits) related to 'standalone' digital triage call centres in comparison to national  
comparator; however, this study differed to the other studies as it utilised household surveys to  
capture service use(30).

1  
2  
3 1 Supplementary table 2 presents detailed findings from studies.  
4  
5  
6 2  
7  
8 3  
9

10  
11 4 *Patient level service use and adherence with advice*  
12  
13 5

14 6 Six studies reported varying patient adherence to triage advice through evaluation of patients'  
15  
16 7 subsequent ED attendance (26, 27, 31, 34, 37, 39). Four utilised routine data and data linkage with  
17  
18 8 sample sizes ranging from: 3312 to 13,019 triage calls. Of these, three studies reported 60% - 70% of  
19  
20 9 patients who were advised to attend ED followed this advice(27, 34, 37); one reported a range of  
21  
22 10 29% – 69%, with higher compliance when ambulance was advised (53-69%) and lowest compliance  
23  
24 11 when self-transport to ED was recommended (29%)(37).  
25  
26  
27

28  
29 12 One small survey of 268 callers reported high levels of adherence with advice to attend ED (96%; 49  
30  
31 13 of 51 calls), to contact a GP (92%; 133 of 144) and to self care (93%; 64 of 69)(26).  
32  
33

34 14 Four studies reported proportions of patients who attended ED after receiving alternative triage  
35  
36 15 advice (other than attending ED): 2.4%(27), 9%(34, 37) and 22%(31). The latter included 51 of 1150  
37  
38 16 parents who had remained worried after calling the digital triage service(31). Results are  
39  
40 17 supplementary table 3.  
41  
42  
43

44 18

45  
46 19

47  
48 20 *Safety*  
49  
50 21

51  
52 22 Four studies highlighted potential triage errors based on hospital admission rates(27, 34, 36, 37).  
53

54 23 These mainly related to potential 'under-triage', where the advice was considered to be at too low a  
55  
56 24 level of urgency in relation to clinical need. However, these findings were peripheral to the main  
57  
58 25 aims of these studies(27, 34, 36, 37).  
59  
60

1  
2  
3 1 One study reported similar hospitalisation rates between patients attending ED who had been  
4  
5 2 directed to 'immediate or prompt' care and 'non-urgent' care: immediate or prompt: 38%(n= 261),  
6  
7 3 95% CI 34–41 vs. non-urgent: 37% (n=56), 95% CI 30–44)(34). Another reported 15% (n=71) of  
8  
9 4 paediatric cases attending ED after being triaged were admitted; of these, 37 had been advised to  
10  
11 5 attend ED and 34 were given other lower urgency advice(37).  
12  
13

14  
15 6 Another study reported 15% (n=15) of patients given advice that was lower urgency than ED  
16  
17 7 attendance, (such as urgent or routine GP appointment or self care), attended ED following their  
18  
19 8 triage call and were admitted(27). One study reported 9.2% (n=30) of patients triaged as not  
20  
21 9 requiring ambulance dispatch were subsequently admitted(27, 36).  
22  
23

24  
25 10 One qualitative study described users reporting not having received appropriate triage advice for  
26  
27 11 symptoms which later turned out to be more serious(44).  
28  
29

30  
31  
32

### 33 **Service user experience**

34  
35  
36

37 15 Seven studies focussed on user experience and satisfaction(6, 40-45). Three studies reported a high  
38  
39 16 level of satisfaction amongst users(6, 31, 40). Two studies reported higher satisfaction amongst  
40  
41 17 those who received higher urgency advice(40, 41). Two studies reported dissatisfaction relating to  
42  
43 18 the relevance and number of triage questions(6, 40). Three studies highlighted that callers felt they  
44  
45 19 needed to be assertive in order to receive the expected care advice(42, 44, 45). For example, a user's  
46  
47 20 post to an online forum:  
48  
49

50  
51 21 "If you need help and advice you can always call the healthcare advice line, if you think  
52  
53 22 they're giving you the 'wrong' advice, tell them, and maybe you'll get better help"(44).  
54  
55

56  
57 23 Two studies reported that users felt that the nurses using digital triage gave them time, conducted  
58  
59 24 'thorough' assessments and felt reassured(43, 45).  
60

1  
2  
3 1 In contrast, one study of users who posted to an online forum reported feeling scrutinized by the  
4  
5 2 nurses questioning their symptoms and need for care(44). Some expressed doubts about nurses'  
6  
7 3 advice, competency and credibility(44).  
8  
9

10  
11 4 Integrated services made for a smoother patient care journey. One study based on an online forum  
12  
13 5 described the experience of poor integration:  
14

15  
16 6 "They send you to the ER where they yell at you for being stupid enough to listen to them  
17  
18 7 (SHD). SHD is a big problem and seems to be at war with the ER"(44).  
19

20  
21 8 In contrast, there was high satisfaction in 71%, of users where the service provider was able to book  
22  
23 9 an appointment at a local service on behalf of the patient (40).  
24

25  
26  
27 10 See figure 3 for a visual summary of findings across studies and table 2 for detailed findings.  
28  
29  
30  
31  
32  
33  
34  
35  
36  
37  
38  
39  
40  
41  
42  
43  
44  
45  
46  
47  
48  
49  
50  
51  
52  
53  
54  
55  
56  
57  
58  
59  
60

1 **Table 2: Findings from studies that investigated user experience and satisfaction**

2

| Author<br>Year<br>Country<br>Reference | Study type                                                                                            | Sample /<br>data size                                       | Digital<br>triage<br>user | Participants               | Key themes and example quotes                                                                                                                                                                                                                                                                                                                                                                                                                                                                                                                                                                                                                                                                                                                                                                                                                                                                                                                                                                                                                                                                                                                                                                                                                                                                                                                                                                                                                         |
|----------------------------------------|-------------------------------------------------------------------------------------------------------|-------------------------------------------------------------|---------------------------|----------------------------|-------------------------------------------------------------------------------------------------------------------------------------------------------------------------------------------------------------------------------------------------------------------------------------------------------------------------------------------------------------------------------------------------------------------------------------------------------------------------------------------------------------------------------------------------------------------------------------------------------------------------------------------------------------------------------------------------------------------------------------------------------------------------------------------------------------------------------------------------------------------------------------------------------------------------------------------------------------------------------------------------------------------------------------------------------------------------------------------------------------------------------------------------------------------------------------------------------------------------------------------------------------------------------------------------------------------------------------------------------------------------------------------------------------------------------------------------------|
| Björkman<br>2018<br>Sweden<br>(44)     | Descriptive research design using information from online forums using six step 'netnographic' method | Data from 3 Swedish online forums were purposively sampled. | Nurse                     | General population (users) | <p><b>General satisfaction/attitudes</b><br/> <i>"Where we are, the healthcare advice line is great, I'd rather call them than my primary care center"</i></p> <p><b>Experience of call taker:</b> Patients expressed doubts and mistrust on advice given and credibility of nurses. Feelings that nurses were not well competent/ qualified and relied on google: <i>"And seriously, are they real nurses who take the calls at SHD? I almost think it sounds like they're googling every question they get."</i></p> <p><b>Safety:</b> Some concerns related to safety and feeling that advice given was not appropriate, for example: a user posted that they were advised to stay at home for a condition that turned out to be serious, <i>"When you're advised to take two paracetamols and go to bed. Not go into the ER. When I was feeling really bad, and called them and described my symptoms, that's the exact advice I was given. The situation ended with my husband more or less forcing me into the car and driving me to the hospital. By then, my lips were purple and I was having trouble keeping my balance. Once there, they found that both my lungs were filled with 100 s of small blood clots."</i></p> <p><b>Assertiveness &amp; negotiation:</b> One user posted, <i>"If you need help and advice you can always call the healthcare advice line, if you think they're giving you the 'wrong' advice, tell them,</i></p> |

|                                                       |                              |                                                                                                                           |                                  |                                             |                                                                                                                                                                                                                                                                                                                                                                                                                                                                                                                                                                                                                                                                                                                                                                                                                                                                                                    |
|-------------------------------------------------------|------------------------------|---------------------------------------------------------------------------------------------------------------------------|----------------------------------|---------------------------------------------|----------------------------------------------------------------------------------------------------------------------------------------------------------------------------------------------------------------------------------------------------------------------------------------------------------------------------------------------------------------------------------------------------------------------------------------------------------------------------------------------------------------------------------------------------------------------------------------------------------------------------------------------------------------------------------------------------------------------------------------------------------------------------------------------------------------------------------------------------------------------------------------------------|
|                                                       |                              |                                                                                                                           |                                  |                                             | <p><i>and maybe you'll get better help"</i></p> <p><b>Service working together:</b> a user expressed dissatisfaction where the service did not work well together,<br/> <i>"There's no point calling [digital triage service name]. They send you to the ER where they yell at you for being stupid enough to listen to them. [digital triage service name] is a big problem and seems to be at war with the ER"</i></p>                                                                                                                                                                                                                                                                                                                                                                                                                                                                           |
| <p><b>O'Cathain<br/>2014<br/>England<br/>(40)</b></p> | <p>Survey</p>                | <p>Survey sent to 1200 patients from each of the 4 pilot sites studied, 1769 responded and were included for analysis</p> | <p>Non-clinical call handler</p> | <p>General population (users)</p>           | <p><b>General satisfaction/attitudes</b></p> <p>Satisfaction levels were good overall (91% very satisfied or satisfied). 73% (1255/1726, 95%confidence interval: 71% to 75%) were very satisfied with the way NHS 111 handled the whole process, 19% (319/1726) were fairly satisfied and 5% (79/1726) were dissatisfied. Two aspects of the service were less acceptable than others: 1) relevance of questions asked and 2) whether the advice given worked in practice.</p> <p><b>Greater satisfaction with higher urgency advice:</b></p> <p>Patients more likely to feel the service was helpful if directed to ambulance service (76%), compared with self-care(64%) visit health centre (55%), other service 54%, contact GP (52%).</p> <p><b>Services working together:</b></p> <p>Patients more likely to feel the service was helpful if an appointment was arranged for them (71%).</p> |
| <p><b>McAteer<br/>2016<br/>Scotland<br/>(6)</b></p>   | <p>Other - mixed methods</p> | <p>Age and sex-stratified random sample of 256 adults</p>                                                                 | <p>Non-clinical call handler</p> | <p>General public (users and non-users)</p> | <p><b>General satisfaction/attitudes:</b></p> <ul style="list-style-type: none"> <li>• Questionnaire findings: over 80% of those who had used the digital triage service reported being either 'satisfied' or 'very satisfied' - education was the only socioeconomic factor associated with satisfaction (with higher educated participants being less satisfied). Interview findings showed users were broadly satisfied with service.</li> <li>• Most common reasons for dissatisfaction related to initial triage questions, for example, "I</li> </ul>                                                                                                                                                                                                                                                                                                                                        |



1  
2  
3  
4  
5  
6  
7  
8  
9  
10  
11  
12  
13  
14  
15  
16  
17  
18  
19  
20  
21  
22  
23  
24  
25  
26  
27  
28  
29  
30  
31  
32  
33  
34  
35  
36  
37  
38  
39  
40  
41  
42  
43  
44  
45  
46

|                                               |        |                                                                                                                                                                                                                               |       |                        |                                                                                                                                                                                                                                                                                                                                                                                                                                                                                                                 |
|-----------------------------------------------|--------|-------------------------------------------------------------------------------------------------------------------------------------------------------------------------------------------------------------------------------|-------|------------------------|-----------------------------------------------------------------------------------------------------------------------------------------------------------------------------------------------------------------------------------------------------------------------------------------------------------------------------------------------------------------------------------------------------------------------------------------------------------------------------------------------------------------|
|                                               |        | from each of 14 Scottish GP surgeries, final sample was 1190 based on response rate with 601 of those having used the digital triage service. Purposive sampling used for interview group with total of 30 being interviewed. |       |                        | <i>just felt that, she should get me onto a nurse and stop asking me questions, you know, I felt it went on too long", and the length of time it took to receive visits and not being kept informed.</i>                                                                                                                                                                                                                                                                                                        |
| <b>Rahmqvist<br/>2011<br/>Sweden<br/>(41)</b> | Survey | Random sample of 660 callers, made at one site in                                                                                                                                                                             | Nurse | General public (users) | <b><i>Greater satisfaction with higher urgency advice</i></b><br>Patients who were recommended to wait and see, were less likely to be satisfied and more likely to make an emergency visit or an on call doctor.<br>Results reported in relation to callers' agreement with advice: analysed using 3 groups: 1) cases: those who disagreed with nurse advice <i>and</i> felt they needed higher level of care; 2) controls: those who disagreed with nurse advice or felt they needed higher level of care; 3) |

|                                 |                 |                              |       |                        |                                                                                                                                                                                                                                                                                                                                                                                                                                                                                                                                                                                                                                                                                                                                                                                                                                                                                                                                                                                                                                                                                      |
|---------------------------------|-----------------|------------------------------|-------|------------------------|--------------------------------------------------------------------------------------------------------------------------------------------------------------------------------------------------------------------------------------------------------------------------------------------------------------------------------------------------------------------------------------------------------------------------------------------------------------------------------------------------------------------------------------------------------------------------------------------------------------------------------------------------------------------------------------------------------------------------------------------------------------------------------------------------------------------------------------------------------------------------------------------------------------------------------------------------------------------------------------------------------------------------------------------------------------------------------------|
|                                 |                 | October 2008                 |       |                        | other callers. Average global patient satisfaction was significantly lower for nurses who served the cases compared to those who had not served the cases                                                                                                                                                                                                                                                                                                                                                                                                                                                                                                                                                                                                                                                                                                                                                                                                                                                                                                                            |
| <b>Goode 2004 England (43)</b>  | Interview study | 60 interviews                | Nurse | General public (users) | <p><b>General satisfaction/attitudes</b><br/>Results related to feelings that the digital triage service was 'trustworthy', and being able to access care without being a 'nuisance'. Authors state that some interviewees experienced or predicted deterioration in service quality: "They'll put a bit too much work on their call centres, they'll be understaffed, then they'll start becoming hurried or you'll lose that friendly 'take as long as you like' sort of attitude that I experienced. . . ."</p> <p><b>Experience of call taker: reassurance</b><br/>Users felt reassured and cared for:</p> <ul style="list-style-type: none"> <li>• "I felt like they cared. I was suffering and I felt like they cared. And that's what I wanted"</li> <li>• "For me to be able to ring somebody, you know, and when I did feel in pain, but wasn't sure whether it was normal or not – well I knew that it wasn't normal, but is it common? And it was nice just to speak to somebody. And, 'Okay, yeah, do go to your doctors', you know, 'you're not being silly'</li> </ul> |
| <b>Winneby 2014 Sweden (45)</b> | Interview study | 8 semi-structured interviews | Nurse | General public (users) | <p><b>Experience of call taker: feeling reassured when taken seriously</b><br/>The authors describe findings relating to users feeling re-assured on follow up care required, "When the nurse believed and advised them to turn to the care center on duty, having obtained a mandate to go there, gave them a sense of security". A quote from a participant: "Because they [nurses] know more than I do and will refer me if it's something serious."</p> <p><b>Assertiveness and negotiation</b><br/>"Being a nurse, I know what to say and what I've done at home. Otherwise they will tell you to "drink plenty of fluids" and 'do this and that'. But now I say that "I have drunk a lot" and 'I</p>                                                                                                                                                                                                                                                                                                                                                                           |

1  
2  
3  
4  
5  
6  
7  
8  
9  
10  
11  
12  
13  
14  
15  
16  
17  
18  
19  
20  
21  
22  
23  
24  
25  
26  
27  
28  
29  
30  
31  
32  
33  
34  
35  
36  
37  
38  
39  
40  
41  
42  
43  
44  
45  
46

|                                            |                    |                  |       |                                                                                              |                                                                                                                                                                                                                                                                                                                                                                                                                                                                                                                                                                                                                                                                                                                                                                                                                                                                                                                                                                                                                                                                                                                                                                  |
|--------------------------------------------|--------------------|------------------|-------|----------------------------------------------------------------------------------------------|------------------------------------------------------------------------------------------------------------------------------------------------------------------------------------------------------------------------------------------------------------------------------------------------------------------------------------------------------------------------------------------------------------------------------------------------------------------------------------------------------------------------------------------------------------------------------------------------------------------------------------------------------------------------------------------------------------------------------------------------------------------------------------------------------------------------------------------------------------------------------------------------------------------------------------------------------------------------------------------------------------------------------------------------------------------------------------------------------------------------------------------------------------------|
|                                            |                    |                  |       |                                                                                              | <i>have medication at home'. It feels as if they [SHD] try to sift out and turn away . . . you don't call unless it's necessary."</i>                                                                                                                                                                                                                                                                                                                                                                                                                                                                                                                                                                                                                                                                                                                                                                                                                                                                                                                                                                                                                            |
| <b>Goode<br/>2004<br/>England<br/>(42)</b> | Interview<br>study | 10<br>interviews | Nurse | General<br>public<br><br>(users)<br>interviews<br>with men /<br>or that<br>related to<br>men | <p><b>General satisfaction/attitudes</b></p> <ul style="list-style-type: none"> <li>• A participant commented on male partner: "He thought it was great. He was very impressed. And a male nurse spoke to him as well, which I think he was even more impressed that a man would know what he was talking about . . ."</li> <li>• The authors describe a male interviewee whose wife called on his behalf "He now described NHS Direct as an excellent and much-needed service, which he would continue to use to meet his need for 'expert' guidance on the appropriate response to symptoms."</li> </ul> <p><b>Assertiveness and negotiation</b></p> <p>One male participant made a follow up call to NHS Direct regarding his wife, whilst his wife was waiting for a call back from the service:</p> <p>"I simply had one aim at that point, which was to get a doctor out to the house without putting the phone down . . . everything was pretty much arranged in the one call. It was acknowledged that things were bad and that a doctor would be calling tonight . . . I guess I was being pretty direct, like, 'She is sick and she must be seen."</p> |

## Discussion

This systematic review has evaluated the evidence on how telephone-based digital triage affects wider health care service use, clinical outcomes and user experience in urgent care. Thirty-one studies were included, covering a range of different designs, settings, populations and digital triage systems. Studies typically showed no change or a reduction in wider healthcare service use following the implementation of digital triage. They reported varied levels of caller adherence to the triage advice provided. There was very limited evidence on clinical outcomes; however four studies reported some findings on hospitalisation rates that highlighted potential safety concerns relating to under-triage.

Overall user satisfaction with telephone based digital triage appears to be high, but there was some evidence of poorer user experience relating to the length and relevance of triage questioning, and perceptions of 'under-triage'. Users sometimes felt the need for assertiveness during calls when their expectations were not being met; however, this is unlikely to be specific to digital triage and has been reported in telephone-based consultation more widely(49).

There was considerable heterogeneity across studies in terms of types of setting, types of participants, study designs and 'digital triage' systems. 'Digital triage' is a complex intervention with outcomes that may be influenced by multiple factors due to varying healthcare systems, local service configuration, staff training and an evolving landscape in the use of digital technologies to allow patients to seek urgent care, for example, through the use of digital self-triage tools. Hence, there needs to be caution in the interpretation of the applicability of findings. Additionally, strength of evidence differed between studies, as demonstrated by the visual tables of key findings; these differences fed into the narrative synthesis of this review.

1  
2  
3 Many of the studies that investigated service use following digital triage implementation reported no  
4 change in wider healthcare service use. In one context, for example, following the replacement of a  
5 nurse-led service with a non-clinician led service this may be seen as a success(38), but this may not be  
6 applicable to all healthcare settings. One study of 'standalone' digital triage implementation showed an  
7 increase in GP clinic use(30), which was in contrast to other studies in this review; this may be because  
8 this service was less embedded within the healthcare system, but could also have been a  
9 methodological consequence of using household surveys to gather service use data(30).  
10  
11  
12  
13  
14  
15  
16  
17  
18  
19  
20  
21  
22

### 23 **Strengths and limitations**

24  
25  
26 This is the first systematic review to focus on the use of telephone based digital triage in urgent care. It  
27 covered a 20-year period, during which some services have started to shift towards non-clinician led  
28 models of service delivery. This review enabled evaluation of a broad range of service models and  
29 settings. However, it was limited to studies published in English, and this may have led to important  
30 evidence being overlooked.  
31  
32  
33  
34  
35  
36  
37

38 This review used a comprehensive mixed methods approach and evaluated quality of studies using the  
39 MMAT tool. Whilst this tool worked well for many studies in this review, an acknowledged  
40 limitation(50) is the applicability of its criteria for assessing studies that are cross-sectional in nature  
41 (where there are not necessarily defined groups with an intervention or exposure); this is applicable to  
42 some of the studies included in this review  
43  
44  
45  
46  
47  
48  
49

50 There was limited evaluation of non-clinician led models of digital triage, with only one study evaluating  
51 service use following implementation and no studies of clinical outcomes. Another limitation is the  
52 scope of the included outcomes; outcomes relating to broad utilisation of services that utilise digital  
53  
54  
55  
56  
57  
58  
59  
60

1  
2  
3 triage (such as call volumes, call lengths and caller characteristics alone), cost effectiveness, and staff  
4  
5 focussed outcomes were not covered.  
6  
7

8 Whist Patient and Public Involvement (PPI) did not directly feed into this review, this forms the first  
9  
10 stage of a wider project investigating user outcomes related to digital triage. For the wider project, has  
11  
12 been sought in the project design, and a panel has been selected to aid the interpretation of results and  
13  
14 dissemination of findings.  
15  
16  
17  
18  
19  
20  
21  
22  
23

#### 24 **Comparison with other literature**

25  
26  
27  
28

29 This review's focus is narrower, in terms of intervention and setting, compared to previous reviews  
30  
31 which evaluated telephone triage more broadly, including services that were not digitally supported(1,  
32  
33 10). Bunn et al.'s review evaluated telephone triage in comparison to usual care(10). They similarly  
34  
35 reported no significant change in wider healthcare use (ED visits, routine GP visits and hospitalisations)  
36  
37 associated with telephone triage. Other reviews found that user satisfaction is generally high when  
38  
39 comparing telephone consultation with other forms of care(10), but lower satisfaction was described  
40  
41 when patients' initial expectations were not met(49).  
42  
43  
44

45 Our review highlights the limited evaluation of clinical outcomes. A previous review of telephone triage  
46  
47 reported limited and inconclusive findings on mortality rates (with no mortalities occurring in some  
48  
49 studies that sought to investigate this outcome), and rates of under-triage and subsequent  
50  
51 hospitalisation ranging from 0.2% – 5.25%(1).  
52  
53  
54  
55  
56  
57  
58  
59  
60

1  
2  
3 Although our review did not include broad utilisation outcomes related to digital triage, a previous study  
4 reported lower than expected use by some ethnic minority groups(51). Our review found that no studies  
5  
6 to date have reported on patterns of advice, user experience, service use or clinical outcomes in ethnic  
7  
8 minority groups; this may have been limited by our exclusion of studies that were not published in  
9  
10 English.  
11  
12

13  
14  
15 We found that patients' adherence with advice varied by setting and study design. While very high  
16 adherence was reported in one survey based study(26), this may be an overestimate due to response  
17 bias in comparison to other studies that evaluated adherence based on routine data. Similar  
18  
19 observations in higher adherence rates in self-reported service use were reported by two reviews(13,  
20  
21 52).  
22  
23  
24  
25  
26  
27  
28  
29

### 30 **Implications for service delivery and future research**

31  
32

33  
34 The review has identified several gaps in the literature, particularly a need for evaluation of patient level  
35 service use and clinical outcomes. Further analysis of large patient level datasets (particularly those that  
36 are linked with subsequent service use and clinical outcomes data) will help to gain a better  
37  
38 understanding of who does and does not adhere to advice and help to evaluate safety concerns relating  
39  
40 to under triage within particular patient sub-groups.  
41  
42  
43  
44

45  
46 In the absence of comparative studies, it is unclear how patient satisfaction and outcomes are affected  
47  
48 by the design of services, the staff groups involved and how they are trained and managed, and the type  
49  
50 of digital triage system deployed. Further evaluation of non-clinician led digital triage may help policy  
51  
52 makers and service commissioners to adopt the most efficient and safe digital triage systems.  
53  
54  
55  
56  
57  
58  
59  
60

1  
2  
3 Whilst not a key aim, this review highlights that associations between factors (such as age, gender,  
4 ethnicity) and urgency of advice have not been explored in depth. The granular demographic and  
5 symptom data captured by digital triage tools gives opportunity to explore these associations which will  
6 likely provide insight into how services are used by different groups and form the basis for generating  
7 hypotheses within particular groups.  
8  
9  
10  
11  
12

13  
14  
15 Many studies in this review were undertaken when digital triage was first being implemented. However,  
16 like any significant service change, digital triage services will take a significant period of time to become  
17 established and performing optimally within urgent care services that have been used to working in  
18 another way. To date, no studies have involved longitudinal data collection to evidence the extent to  
19 which this occurs. Longer term evaluation studies are needed to explore how the safety and  
20 effectiveness of services changes over time. In addition, telephone based approaches to seeking care  
21 have been critical during the Covid-19 pandemic and are likely to be more widely adopted in the long  
22 term(53); therefore, evaluation of how these services have functioned during and after the pressures of  
23 a pandemic is also important.  
24  
25  
26  
27  
28  
29  
30  
31  
32  
33  
34  
35

36 Lastly, this review highlights limited qualitative and mixed methods approaches to date. Integrating  
37 findings from routine data with qualitative research will help to better understand user experiences and  
38 care needs of particular patients groups in more depth. These could feed into targeted support for these  
39 groups within or outside of digital triage services, and ultimately improved delivery of these services  
40 which are key to a well functioning healthcare system.  
41  
42  
43  
44  
45  
46  
47

## 48 **Data availability statement**

49  
50  
51 All data relevant to the study are included in the article or uploaded as supplementary information  
52  
53  
54  
55  
56  
57  
58  
59  
60



## Ethics and dissemination

Ethical approval was not required for this review as the data included were obtained from published, publicly available sources.

### Competing interests

The authors declare that they have no competing interests

### Funding statement

This systematic review is part of a PhD that is funded through University of Warwick in collaboration with an industrial partner: Advanced (<https://www.oneadvanced.com/>)

### Authors' contributions

VS developed the review protocol, with the support of HA and JD. VS conducted searches. VS, CB, ES, JB conducted screening, data extraction and quality assessment. VS conducted the narrative synthesis with support from CB and HA. HA and JD reviewed and revised manuscript and approved the final version. VS in the guarantor for the review.

### Acknowledgements

The authors would like to thank Samantha Johnson (Academic Support Librarian, University of Warwick) for support with developing the search strategy. Patients and or public were not involved directly in the conduct of this review.

### Figure Captions

Figure 1: PRISMA Flowchart

1  
2  
3 Figure 2: Findings from studies of service use after digital triage implementation  
4  
5

6 Figure 3: Key themes from studies of user experience  
7  
8  
9  
10

## 11 References

- 12
- 13 1. Huibers L, Smits M, Renaud V, Giesen P, Wensing M. Safety of telephone triage in out-of-hours  
14 care: A systematic review. *Scandinavian Journal of Primary Health Care*. 2011;29(4):198-209.
- 15 2. Tan S, Mays N. Impact of initiatives to improve access to, and choice of, primary and urgent care  
16 in England: A systematic review. *Health Policy*. 2014;118(3):304-15.
- 17 3. Salisbury C, Coulter A. Urgent care and the patient. *Emergency Medicine Journal*.  
18 2010;27(3):181-2.
- 19 4. Blakoe M, Gamst-Jensen H, von Euler-Chelpin M, Christensen HC, Moller T. Sociodemographic  
20 and health-related determinants for making repeated calls to a medical helpline: a prospective cohort  
21 study. *Bmj Open*. 2019;9(7).
- 22 5. Elliott AM, McAteer A, Heaney D, Ritchie LD, Hannaford PC. Examining the role of  
23 Scotland's telephone advice service (NHS 24) for managing health in the community: analysis of  
24 routinely collected NHS 24 data. *BMJ Open*. 2015;5(8):e007293.
- 25 6. McAteer A, Hannaford PC, Heaney D, Ritchie LD, Elliott AM. Investigating the public's use of  
26 Scotland's primary care telephone advice service (NHS 24): a population-based cross-sectional study.  
27 *British Journal of General Practice*. 2016;66(646):e337.
- 28 7. Njeru JW, Damodaran S, North F, Jacobson DJ, Wilson PM, St Sauver JL, et al. Telephone triage  
29 utilization among patients with limited English proficiency. *BMC Health Serv Res*. 2017;17(1):706.
- 30 8. North F, Varkey P, Laing B, Cha SS, Tullledge-Scheitel S. Are e-health web users looking for  
31 different symptom information than callers to triage centers? *Telemedicine journal and e health : the*  
32 *official journal of the American Telemedicine Association*. 2011;17(1):19-24.
- 33 9. McKenzie R, Williamson M, Roberts R. Who uses the 'after hours GP helpline'? A profile of users  
34 of an after-hours primary care helpline. *Australian Family Physician*. 2016;45:313-8.
- 35 10. Bunn F, Byrne G, Kendall S. The effects of telephone consultation and triage on healthcare use  
36 and patient satisfaction: a systematic review. *British Journal of General Practice*. 2005;55(521):956.
- 37 11. Blank L, Coster J, O'Cathain A, Knowles E, Tosh J, Turner J, et al. The appropriateness of, and  
38 compliance with, telephone triage decisions: a systematic review and narrative synthesis. *Journal of*  
39 *Advanced Nursing*. 2012;68(12):2610-21.
- 40 12. Randell. Effects of computerized decision support systems on nursing performance and patient  
41 outcomes: a systematic review. *Journal of Health Services Research & Policy*. 2007;12(4):242-51.
- 42 13. Carrasqueiro S, Oliveira M, Encarnação P. Evaluation of telephone triage and advice services: A  
43 systematic review on methods, metrics and results. *Studies in health technology and informatics*.  
44 2011;169:407-11.
- 45 14. Moher D, Liberati A, Tetzlaff J, Altman DG, The PG. Preferred Reporting Items for Systematic  
46 Reviews and Meta-Analyses: The PRISMA Statement. *PLOS Medicine*. 2009;6(7):e1000097.
- 47 15. Sexton V, Dale J, Atherton H. An evaluation of service user experience, clinical outcomes and  
48 service use associated with urgent care services that utilise telephone-based digital triage: a systematic  
49 review protocol. *Syst*. 2021;10(1):25.
- 50  
51  
52  
53  
54  
55  
56  
57  
58  
59  
60

16. Methley AM, Campbell S, Chew-Graham C, McNally R, Cheraghi-Sohi S. PICO, PICOS and SPIDER: a comparison study of specificity and sensitivity in three search tools for qualitative systematic reviews. *BMC Health Serv Res*. 2014;14(1):579.
17. Hong QN. 'Mixed Methods Appraisal Tool' version 2018 public wiki [Available from: <http://mixedmethodsappraisaltoolpublic.pbworks.com/w/page/24607821/FrontPage>.
18. Poyay J. Guidance on the conduct of narrative synthesis in systematic reviews 2006 30 March 2020. Available from: [https://www.researchgate.net/profile/Mark\\_Rodgers4/publication/233866356\\_Guidance\\_on\\_the\\_conduct\\_of\\_narrative\\_synthesis\\_in\\_systematic\\_reviews\\_A\\_product\\_from\\_the\\_ESRC\\_Methods\\_Programme/links/02e7e5231e8f3a6183000000/Guidance-on-the-conduct-of-narrative-synthesis-in-systematic-reviews-A-product-from-the-ESRC-Methods-Programme.pdf](https://www.researchgate.net/profile/Mark_Rodgers4/publication/233866356_Guidance_on_the_conduct_of_narrative_synthesis_in_systematic_reviews_A_product_from_the_ESRC_Methods_Programme/links/02e7e5231e8f3a6183000000/Guidance-on-the-conduct-of-narrative-synthesis-in-systematic-reviews-A-product-from-the-ESRC-Methods-Programme.pdf).
19. North F, Muthu A, Varkey P. Differences between surrogate telephone triage calls in an adult population and self calls. *Journal of Telemedicine and Telecare*. 2010;17(3):118-22.
20. Cook EJ, Randhawa G, Large S, Guppy A, Chater AM, Pang D. Young people's use of NHS Direct: a national study of symptoms and outcome of calls for children aged 0–15. *BMJ Open*. 2013;3(12):e004106.
21. Hsu W-C, Bath PA, Large S, Williams S. Older people's use of NHS Direct. *Age and Ageing*. 2011;40(3):335-40.
22. North F, Varkey P. How serious are the symptoms of callers to a telephone triage call centre? *Journal of Telemedicine and Telecare*. 2010;16(7):383-8.
23. Payne F, Jessopp L. NHS Direct: review of activity data for the first year of operation at one site. *J Public Health Med*. 2001;23(2):155-8.
24. Jácome M, Rego N, Veiga P. Potential of a nurse telephone triage line to direct elderly to appropriate health care settings. *J Nurs Manag*. 2019;27(6):1275-84.
25. Zwaanswijk M, Nielen MMJ, Hek K, Verheij RA. Factors associated with variation in urgency of primary out-of-hours contacts in the Netherlands: A cross-sectional study. *BMJ Open*. 2015;5(10).
26. Byrne G, Morgan J, Kendall S, Saberi D. A survey of NHS Direct callers' use of health services and the interventions they received. *Primary Health Care Research & Development*. 2007;8(1):91-100.
27. Foster J, Jessopp L, Chakraborti S. Do callers to NHS Direct follow the advice to attend an accident and emergency department? *Emergency Medicine Journal*. 2003;20(3):285.
28. Munro J, Sampson F, Nicholl J. The impact of NHS Direct on the demand for out-of-hours primary and emergency care. *British Journal of General Practice*. 2005;55(519):790.
29. Munro J, Nicholl J, Cathain A, Knowles E. Impact of NHS Direct on demand for immediate care: observational study. *BMJ*. 2000;321(7254):150.
30. Dunt D, Day SE, Kelaher M, Montalto M. Impact of standalone and embedded telephone triage systems on after hours primary medical care service utilisation and mix in Australia. *Australia and New Zealand Health Policy*. 2005;2(1).
31. Turbitt E, Freed GL. Use of a telenursing triage service by Victorian parents attending the emergency department for their child's lower urgency condition. *Emerg Med Australas*. 2015;27(6):558-62.
32. Lattimer V, Sassi F, George S, Moore M, Turnbull J, Mullee M, et al. Cost analysis of nurse telephone consultation in out of hours primary care: evidence from a randomised controlled trial. *BMJ*. 2000;320(7241):1053-7.
33. Huibers L, Koetsenruijter J, Grol R, Giesen P, Wensing M. Follow-up after telephone consultations at out-of-hours primary care. *Journal of the American Board of Family Medicine*. 2013;26(4):373-9.

- 1
- 2
- 3
- 4 34. Sprivulis P, Carey M, Rouse I. Compliance with advice and appropriateness of emergency
- 5 presentation following contact with the HealthDirect telephone triage service. *Emergency Medicine.*
- 6 2004;16(1):35-40.
- 7 35. Morimura N, Aruga T, Sakamoto T, Aoki N, Ohta S, Ishihara T, et al. The impact of an emergency
- 8 telephone consultation service on the use of ambulances in Tokyo. *Emergency Medicine Journal.*
- 9 2011;28(1):64-70.
- 10 36. Dale J, Higgins J, Williams S, Foster T, Snooks H, Crouch R, et al. Computer assisted assessment
- 11 and advice for "non-serious" 999 ambulance service callers: the potential impact on ambulance
- 12 despatch. *Emergency Medicine Journal.* 2003;20(2):178-83.
- 13 37. Stewart B, Fairhurst R, Markland J, Marzouk O. Review of calls to NHS Direct related to
- 14 attendance in the paediatric emergency department. *Emergency Medicine Journal.* 2006;23(12):911.
- 15 38. Turner J, O'Cathain A, Knowles E, Nicholl J. Impact of the urgent care telephone service NHS 111
- 16 pilot sites: a controlled before and after study. *BMJ Open.* 2013;3(11):e003451.
- 17 39. Siddiqui N, Greenfield D, Lawler A. Calling for confirmation, reassurance, and direction:
- 18 Investigating patient compliance after accessing a telephone triage advice service. *International Journal*
- 19 *of Health Planning and Management.* 2020:735-45.
- 20 40. O'Cathain A, Knowles E, Turner J, Nicholl J. Acceptability of NHS 111 the telephone service for
- 21 urgent health care: cross sectional postal survey of users' views. *Fam Pract.* 2014;31(2):193-200.
- 22 41. Rahmqvist M, Ernesäter A, Holmström I. Triage and patient satisfaction among callers in Swedish
- 23 computer-supported telephone advice nursing. *Journal of Telemedicine and Telecare.* 2011;17(7):397-
- 24 402.
- 25 42. Goode J, Hanlon G, Luff D, O'Cathain A, Strangleman T, Greatbatch D. Male Callers to NHS
- 26 Direct: The Assertive Carer, the New Dad and the Reluctant Patient. *Health.* 2004;8(3):311-28.
- 27 43. Goode J. Risk and the responsible health consumer: the problematics of entitlement among
- 28 callers to NHS Direct. *Critical social policy.* 2004;24(2):12.
- 29 44. Björkman A, Salzmänn-Erikson M. The bidirectional mistrust: Callers' online discussions about
- 30 their experiences of using the national telephone advice service. *Internet Research.* 2018;28(5):1336-50.
- 31 45. Winneby E, Flensner G, Rudolfsson G. Feeling rejected or invited: Experiences of persons seeking
- 32 care advice at the Swedish Healthcare Direct organization. *Japan Journal of Nursing Science.*
- 33 2014;11(2):87-93.
- 34 46. Mark AL, Shepherd ID. How has NHS Direct changed primary care provision? *J Telemed Telecare.*
- 35 2003;9 Suppl 1:S57-9.
- 36 47. Ernesäter A, Engström M, Holmström I, Winblad U. Incident reporting in nurse-led national
- 37 telephone triage in Sweden: the reported errors reveal a pattern that needs to be broken. *Journal of*
- 38 *Telemedicine and Telecare.* 2010;16(5):243-7.
- 39 48. Lattimer V, Sassi F, George S, Moore M, Turnbull J, Mullee M, et al. Cost analysis of nurse
- 40 telephone consultation in out of hours primary care: evidence from a randomised controlled trial. *Bmj-*
- 41 *British Medical Journal.* 2000;320(7241):1053-+.
- 42 49. Lake R, Georgiou A, Li J, Li L, Byrne M, Robinson M, et al. The quality, safety and governance of
- 43 telephone triage and advice services - an overview of evidence from systematic reviews. *BMC Health*
- 44 *Serv Res.* 2017;17(1):614.
- 45 50. Hong Q. Questions on the MMAT version 2018 [Available from:
- 46 <http://mixedmethodsappraisaltoolpublic.pbworks.com/w/page/71030694/FAQ>.
- 47 51. Cook EJ, Randhawa G, Large S, Guppy A, Chater AM, Pang D. Who uses NHS Direct? Investigating
- 48 the impact of ethnicity on the uptake of telephone based healthcare. *Int J Equity Health.* 2014;13:99-.
- 49 52. Blank L, Coster J, O'Cathain A, Knowles E, Tosh J, Turner J, et al. The appropriateness of, and
- 50 compliance with, telephone triage decisions: a systematic review and narrative synthesis. *Journal of*
- 51 *Advanced Nursing.* 2012;68(12):2610-21.
- 52
- 53
- 54
- 55
- 56
- 57
- 58
- 59
- 60

1  
2  
3  
4  
5  
6  
7  
8  
9  
10  
11  
12  
13  
14  
15  
16  
17  
18  
19  
20  
21  
22  
23  
24  
25  
26  
27  
28  
29  
30  
31  
32  
33  
34  
35  
36  
37  
38  
39  
40  
41  
42  
43  
44  
45  
46  
47  
48  
49  
50  
51  
52  
53  
54  
55  
56  
57  
58  
59  
60

53. Wosik J, Fudim M, Cameron B, Gellad ZF, Cho A, Phinney D, et al. Telehealth transformation: COVID-19 and the rise of virtual care. *Journal of the American Medical Informatics Association*. 2020;27(6):957-62.

For peer review only

1  
2  
3  
4  
5  
6  
7  
8  
9  
10  
11  
12  
13  
14  
15  
16  
17  
18  
19  
20  
21  
22  
23  
24  
25  
26  
27  
28  
29  
30  
31  
32  
33  
34  
35  
36  
37  
38  
39  
40  
41  
42  
43  
44  
45  
46  
47  
48  
49  
50  
51  
52  
53  
54  
55  
56  
57  
58  
59  
60

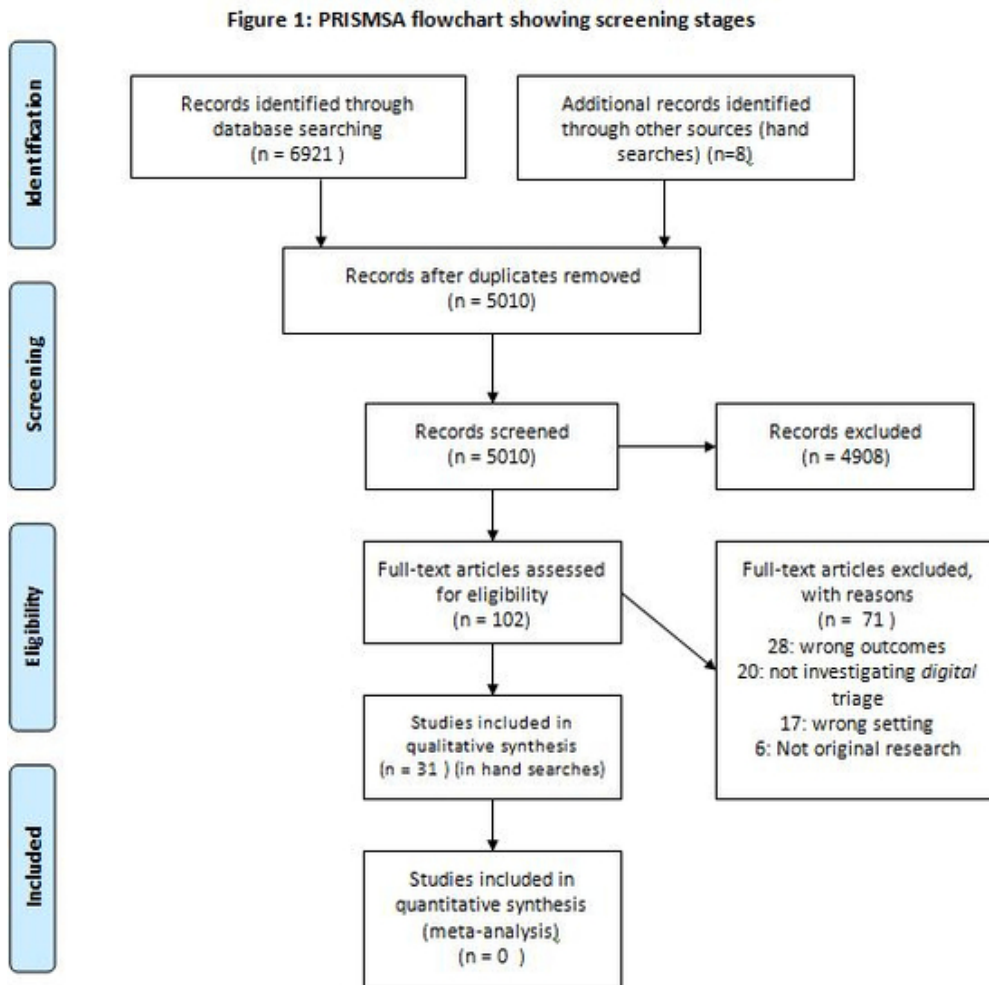

Figure 1: PRISMA Flowchart

46x47mm (300 x 300 DPI)

Figure 2: Change in service use after digital triage implementation and strength of evidence

| Author/year/reference | Reduction in primary care workload * | No significant change in primary care use * | Increase in primary care workload * | No significant change in ED attendance | Increase in ED attendance | Reduction in emergency admissions | Reduction in ambulance service workload | No significant change in use of ambulance services |
|-----------------------|--------------------------------------|---------------------------------------------|-------------------------------------|----------------------------------------|---------------------------|-----------------------------------|-----------------------------------------|----------------------------------------------------|
| Lattimer 2000 (32)    | ✓                                    |                                             |                                     |                                        |                           | ✓                                 |                                         |                                                    |
| Munro 2000 27 (29)    | ✓                                    |                                             |                                     | ✓                                      |                           |                                   |                                         | ✓                                                  |
| Dale 2003 (36)        |                                      |                                             |                                     |                                        |                           |                                   | ✓                                       |                                                    |
| Mark 2003 (46)        | ✓                                    |                                             |                                     |                                        | ✓                         |                                   |                                         |                                                    |
| Dunt 2005 (30)        |                                      |                                             | ✓                                   |                                        |                           |                                   |                                         | ✓                                                  |
| Munro 2005 (28)       | ✓                                    |                                             |                                     | ✓                                      |                           |                                   |                                         | ✓                                                  |
| Morimura 2010 (35)    |                                      |                                             |                                     |                                        |                           |                                   | ✓                                       |                                                    |
| Turner 2013 (38)      |                                      | ✓                                           |                                     | ✓                                      |                           |                                   | ✓                                       |                                                    |

\*change in one or more: home visits, general practice cooperatives, primary care centres or OOH general practice

Green = studies of high quality

Amber = studies of medium quality

Red = studies of lower quality

Figure 2: Findings from studies of service use after digital triage implementation

137x46mm (300 x 300 DPI)

Figure 3: Key themes and strength of evidence from studies of service user experience

| Author/year/reference | Positive experiences / high level of satisfaction | Satisfaction related to advice urgency (higher urgency advice related to greater satisfaction) | Use of assertiveness to influence triage advice | Users felt reassured | Doubts about call takers' competency | Safety concerns | Length & relevance of triage questions |
|-----------------------|---------------------------------------------------|------------------------------------------------------------------------------------------------|-------------------------------------------------|----------------------|--------------------------------------|-----------------|----------------------------------------|
| Bjorkman 2018 (44)    | ✓                                                 |                                                                                                | ✓                                               |                      | ✓                                    | ✓               |                                        |
| O'Cathain 2014 (40)   | ✓                                                 | ✓                                                                                              |                                                 |                      |                                      |                 | ✓                                      |
| McAteer 2016 (6)      | ✓                                                 |                                                                                                |                                                 |                      |                                      |                 | ✓                                      |
| Rahmqvist 2011 (41)   |                                                   | ✓                                                                                              |                                                 |                      |                                      |                 |                                        |
| Goode 2004 (60)       | ✓                                                 |                                                                                                |                                                 | ✓                    |                                      |                 |                                        |
| Winneby 2014 (45)     | ✓                                                 |                                                                                                | ✓                                               | ✓                    |                                      |                 |                                        |
| Goode 2004 (43)       | ✓                                                 |                                                                                                | ✓                                               | ✓                    |                                      |                 |                                        |

Green = studies of high quality  
 Amber = studies of medium quality

Figure 3: Key themes from studies of user experience

112x43mm (300 x 300 DPI)



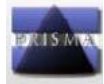

# PRISMA 2009 Checklist

| Section/topic                      | #  | Checklist item                                                                                                                                                                                                                                                                                              | Reported on page # |
|------------------------------------|----|-------------------------------------------------------------------------------------------------------------------------------------------------------------------------------------------------------------------------------------------------------------------------------------------------------------|--------------------|
| <b>TITLE</b>                       |    |                                                                                                                                                                                                                                                                                                             |                    |
| Title                              | 1  | Identify the report as a systematic review, meta-analysis, or both.                                                                                                                                                                                                                                         | 2                  |
| <b>ABSTRACT</b>                    |    |                                                                                                                                                                                                                                                                                                             |                    |
| Structured summary                 | 2  | Provide a structured summary including, as applicable: background; objectives; data sources; study eligibility criteria, participants, and interventions; study appraisal and synthesis methods; results; limitations; conclusions and implications of key findings; systematic review registration number. | 2                  |
| <b>INTRODUCTION</b>                |    |                                                                                                                                                                                                                                                                                                             |                    |
| Rationale                          | 3  | Describe the rationale for the review in the context of what is already known.                                                                                                                                                                                                                              | 4                  |
| Objectives                         | 4  | Provide an explicit statement of questions being addressed with reference to participants, interventions, comparisons, outcomes, and study design (PICOS).                                                                                                                                                  | 5                  |
| <b>METHODS</b>                     |    |                                                                                                                                                                                                                                                                                                             |                    |
| Protocol and registration          | 5  | Indicate if a review protocol exists, if and where it can be accessed (e.g., Web address), and, if available, provide registration information including registration number.                                                                                                                               | 4                  |
| Eligibility criteria               | 6  | Specify study characteristics (e.g., PICOS, length of follow-up) and report characteristics (e.g., years considered, language, publication status) used as criteria for eligibility, giving rationale.                                                                                                      | 5                  |
| Information sources                | 7  | Describe all information sources (e.g., databases with dates of coverage, contact with study authors to identify additional studies) in the search and date last searched.                                                                                                                                  | 5                  |
| Search                             | 8  | Present full electronic search strategy for at least one database, including any limits used, such that it could be repeated.                                                                                                                                                                               | 5<br>(appendix 2)  |
| Study selection                    | 9  | State the process for selecting studies (i.e., screening, eligibility, included in systematic review, and, if applicable, included in the meta-analysis).                                                                                                                                                   | 6                  |
| Data collection process            | 10 | Describe method of data extraction from reports (e.g., piloted forms, independently, in duplicate) and any processes for obtaining and confirming data from investigators.                                                                                                                                  | 6                  |
| Data items                         | 11 | List and define all variables for which data were sought (e.g., PICOS, funding sources) and any assumptions and simplifications made.                                                                                                                                                                       | 6<br>(appendix 3)  |
| Risk of bias in individual studies | 12 | Describe methods used for assessing risk of bias of individual studies (including specification of whether this was done at the study or outcome level), and how this information is to be used in any data synthesis.                                                                                      | 7                  |
| Summary measures                   | 13 | State the principal summary measures (e.g., risk ratio, difference in means).                                                                                                                                                                                                                               | n/a                |

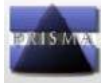

# PRISMA 2009 Checklist

|                      |    |                                                                                                                                                           |   |
|----------------------|----|-----------------------------------------------------------------------------------------------------------------------------------------------------------|---|
| Synthesis of results | 14 | Describe the methods of handling data and combining results of studies, if done, including measures of consistency (e.g., $I^2$ ) for each meta-analysis. | 7 |
|----------------------|----|-----------------------------------------------------------------------------------------------------------------------------------------------------------|---|

Page 1 of 2

| Section/topic                 | #  | Checklist item                                                                                                                                                                                           | Reported on page #          |
|-------------------------------|----|----------------------------------------------------------------------------------------------------------------------------------------------------------------------------------------------------------|-----------------------------|
| Risk of bias across studies   | 15 | Specify any assessment of risk of bias that may affect the cumulative evidence (e.g., publication bias, selective reporting within studies).                                                             | 7                           |
| Additional analyses           | 16 | Describe methods of additional analyses (e.g., sensitivity or subgroup analyses, meta-regression), if done, indicating which were pre-specified.                                                         | n/a                         |
| <b>RESULTS</b>                |    |                                                                                                                                                                                                          |                             |
| Study selection               | 17 | Give numbers of studies screened, assessed for eligibility, and included in the review, with reasons for exclusions at each stage, ideally with a flow diagram.                                          | 6 (+ appendix 3)            |
| Study characteristics         | 18 | For each study, present characteristics for which data were extracted (e.g., study size, PICOS, follow-up period) and provide the citations.                                                             | 8 (table 1)                 |
| Risk of bias within studies   | 19 | Present data on risk of bias of each study and, if available, any outcome level assessment (see item 12).                                                                                                | 8 (table 1)                 |
| Results of individual studies | 20 | For all outcomes considered (benefits or harms), present, for each study: (a) simple summary data for each intervention group (b) effect estimates and confidence intervals, ideally with a forest plot. | n/a                         |
| Synthesis of results          | 21 | Present results of each meta-analysis done, including confidence intervals and measures of consistency.                                                                                                  | n/a                         |
| Risk of bias across studies   | 22 | Present results of any assessment of risk of bias across studies (see Item 15).                                                                                                                          | 8 (table 1) See MMAT rating |
| Additional analysis           | 23 | Give results of additional analyses, if done (e.g., sensitivity or subgroup analyses, meta-regression [see Item 16]).                                                                                    | n/a                         |
| <b>DISCUSSION</b>             |    |                                                                                                                                                                                                          |                             |
| Summary of evidence           | 24 | Summarize the main findings including the strength of evidence for each main outcome; consider their relevance to key groups (e.g., healthcare providers, users, and policy makers).                     | 44 – 45                     |
| Limitations                   | 25 | Discuss limitations at study and outcome level (e.g., risk of bias), and at review-level (e.g., incomplete retrieval of identified research, reporting bias).                                            | 45                          |
| Conclusions                   | 26 | Provide a general interpretation of the results in the context of other evidence, and implications for future research.                                                                                  | 46 - 47                     |
| <b>FUNDING</b>                |    | For peer review only - <a href="http://bmjopen.bmj.com/site/about/guidelines.xhtml">http://bmjopen.bmj.com/site/about/guidelines.xhtml</a>                                                               |                             |



# PRISMA 2009 Checklist

1  
2  
3  
4  
5  
6  
7  
8  
9  
10  
11  
12  
13  
14  
15  
16  
17  
18  
19  
20  
21  
22  
23  
24  
25  
26  
27  
28  
29  
30  
31  
32  
33  
34  
35  
36  
37  
38  
39  
40  
41  
42  
43  
44  
45  
46  
47

|         |    |                                                                                                                                            |    |
|---------|----|--------------------------------------------------------------------------------------------------------------------------------------------|----|
| Funding | 27 | Describe sources of funding for the systematic review and other support (e.g., supply of data); role of funders for the systematic review. | 48 |
|---------|----|--------------------------------------------------------------------------------------------------------------------------------------------|----|

From: Moher D, Liberati A, Tetzlaff J, Altman DG, The PRISMA Group (2009). Preferred Reporting Items for Systematic Reviews and Meta-Analyses: The PRISMA Statement. PLoS Med 6(6): e1000097. doi:10.1371/journal.pmed1000097

For more information, visit: [www.prisma-statement.org](http://www.prisma-statement.org).

Page 2 of 2

For peer review only

**Appendix 2: Search terms used for Medline search**

| Concept      | Search terms                                                                                                                                                                             |
|--------------|------------------------------------------------------------------------------------------------------------------------------------------------------------------------------------------|
| Care setting | Primary care.mp OR Primary Health Care/ OR After-Hours Care/ OR Out of hours.mp OR Emergency care.mp OR Emergency Medical Services/ OR Urgent care OR Ambulatory Care AND                |
| Triage       | Triage.mp OR Triage/ OR Telephone consultation.mp AND                                                                                                                                    |
| Digital      | Digital OR Computer OR Software OR Online OR Internet OR Web OR Computerised OR Computerized OR electronic OR ECDS* OR CCDS* OR Decision Support Systems, Clinical/ OR Decision support* |

### Appendix 3

#### Data extraction form variables

The following information was extracted and entered into the data extraction form:

- Author
- Publication year
- Country
- Study design
- Care setting
- Participants
- Intervention details
- Type of care service staff conducting triage (doctor/nurse/paramedic/non-clinician),
- Comparator
- Outcomes
- Effect of intervention
- Contextual factors, (for example: staff experience and training, time that the service has been in place, level of support available to call takers).

Appendix 4 MMAT results - studies investigating patterns of triage advice urgency

| Quantitative Non-Randomised studies                |                                                                                               | Frederick North 2011 | EJ Cook 2013  | Wen-Chin Hsu 2010 | F North 2010 | Zwaanswijk 2015 |
|----------------------------------------------------|-----------------------------------------------------------------------------------------------|----------------------|---------------|-------------------|--------------|-----------------|
| Screening questions                                | Are there clear research questions?                                                           | Yes                  | Yes           | Yes               | Yes          | Yes             |
|                                                    | Do the collected data allow to address the research questions?                                | Yes                  | Yes           | Yes               | Yes          | Yes             |
| Criteria for Quantitative (Non-randomised studies) | Are the participants representative of the target population?                                 | Yes                  | Yes           | Yes               | Yes          | Yes             |
|                                                    | Are measurements appropriate regarding both the outcome and intervention (or exposure)?       | Yes                  | Yes           | Yes               | Yes          | Yes             |
|                                                    | Are there complete outcome data?                                                              | No                   | No            | Yes               | Can't tell   | Yes             |
|                                                    | Are the confounders accounted for in the design and analysis?                                 | Can't tell           | Can't tell    | Can't tell        | Can't tell   | Can't tell      |
|                                                    | During the study period, is the intervention administered (or exposure occurred) as intended? | Yes                  | Yes           | Yes               | Yes          | Yes             |
|                                                    |                                                                                               | Medium (3/5)         | Medium (3/5)  | High (4/5)        | Medium (3/5) | High (4/5)      |
| Quantitative Descriptive studies                   |                                                                                               | F Payne 2005         | M Jacome 2018 | A Elliot 2011     | J Njeru 2017 |                 |
| Screening questions                                | Are there clear research questions?                                                           | yes                  | Yes           | Yes               | Yes          |                 |
|                                                    | Do the collected data allow to address the research questions?                                | yes                  | Yes           | Yes               | Yes          |                 |
| Criteria for Quantitative (Descriptive studies)    | Is the sampling strategy relevant to address the research question?                           | yes                  | Yes           | Yes               | Yes          |                 |
|                                                    | Is the sample representative of the target population?                                        | yes                  | Yes           | Yes               | Yes          |                 |
|                                                    | Are the measurements appropriate?                                                             | yes                  | Yes           | Yes               | Yes          |                 |
|                                                    | Is the risk of nonresponse bias low?                                                          | Yes                  | Yes           | Yes               | Yes          |                 |
|                                                    | Is the statistical analysis appropriate to answer the research question?                      | Yes                  | Yes           | Yes               | Yes          |                 |
|                                                    |                                                                                               | High (5/5)           | High (5/5)    | High (5/5)        | High (5/5)   |                 |

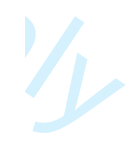

MMAT results - studies investigating service use

|                     | Non-randomised studies                                                                        | Judy Foster 2002 | James Munro 2005 | James Munro 2000 | D Dunt 2005  | L Huibers 2013 | P Sprivulis 2003 | Morimura 2010 | J Dale 2003 |
|---------------------|-----------------------------------------------------------------------------------------------|------------------|------------------|------------------|--------------|----------------|------------------|---------------|-------------|
| Screening questions | Are there clear research questions?                                                           | Yes              | Yes              | Yes              | Yes          | Yes            | Yes              | Yes           | Yes         |
|                     | Do the collected data allow to address the research questions?                                | Yes              | Yes              | Yes              | Yes          | Yes            | Yes              | Yes           | Yes         |
| Quality criteria    | Are the participants representative of the target population?                                 | Yes              | Yes              | Yes              | Yes          | Yes            | Yes              | Yes           | Yes         |
|                     | Are measurements appropriate regarding both the outcome and intervention (or exposure)?       | Yes              | Yes              | Yes              | Yes          | Yes            | Yes              | Yes           | Yes         |
|                     | Are there complete outcome data?                                                              | Can't tell       | Can't tell       | Can't tell       | Can't tell   | Yes            | Yes              | Can't tell    | Yes         |
|                     | Are the confounders accounted for in the design and analysis?                                 | Can't tell       | Can't tell       | Yes              | No           | Yes            | Can't tell       | Can't tell    | Yes         |
|                     | During the study period, is the intervention administered (or exposure occurred) as intended? | Yes              | Yes              | Yes              | Yes          | Yes            | Yes              | Yes           | Yes         |
|                     | Quality score                                                                                 | Medium (3/5)     | Medium (3/5)     | High (4/5)       | Medium (3/5) | High (5/5)     | High (4/5)       | Medium (3/5)  | High (5/5)  |

|                     | <b>Quantitative descriptive studies</b>                                  | Geraldine Byrne 2007 | E Turbitt 2015 | V Lattimer 2000 | B Stewart 2006 | J Turner 2013 | N Siddiqui 2019 |
|---------------------|--------------------------------------------------------------------------|----------------------|----------------|-----------------|----------------|---------------|-----------------|
| Screening questions | Are there clear research questions?                                      | Yes                  | Yes            | Yes             | Yes            | Yes           | Yes             |
|                     | Do the collected data allow to address the research questions?           | Yes                  | Yes            | Yes             | Yes            | Yes           | Yes             |
| Quality criteria    | Is the sampling strategy relevant to address the research question?      | Yes                  | Can't tell     | Yes             | Yes            | Yes           | Yes             |
|                     | Is the sample representative of the target population?                   | Yes                  | Yes            | Can't tell      | Yes            | Yes           | Yes             |
|                     | Are the measurements appropriate?                                        | Yes                  | Yes            | Yes             | Yes            | Yes           | Yes             |
|                     | Is the risk of nonresponse bias low?                                     | Yes                  | No             | Can't tell      | Yes            | Yes           | Yes             |
|                     | Is the statistical analysis appropriate to answer the research question? | Yes                  | Yes            | Yes             | Yes            | Yes           | Yes             |
|                     | <b>Quality score</b>                                                     | High (5/5)           | Medium (3/5)   | Medium (3/5)    | High (5/5)     | High (5/5)    | High (5/5)      |

only

1  
2  
3  
4  
5  
6  
7  
8  
9  
10  
11  
12  
13  
14  
15  
16  
17  
18  
19  
20  
21  
22  
23  
24  
25  
26  
27  
28  
29  
30  
31  
32  
33  
34  
35  
36  
37  
38  
39  
40  
41  
42  
43  
44  
45  
46



|                     | Mixed methods studies                                                                                                   | A Mark 2003      |
|---------------------|-------------------------------------------------------------------------------------------------------------------------|------------------|
| Screening questions | Are there clear research questions?                                                                                     | Yes              |
|                     | S2. Do the collected data allow to address the research questions?                                                      | Yes              |
| Quality criteria    | 5.1. Is there an adequate rationale for using a mixed methods design to address the research question?                  | Yes              |
|                     | 5.2. Are the different components of the study effectively integrated to answer the research question?                  | Yes              |
|                     | 5.3. Are the outputs of the integration of qualitative and quantitative components adequately interpreted?              | Can't tell       |
|                     | 5.4. Are divergences and inconsistencies between quantitative and qualitative results adequately addressed?             | Can't tell       |
|                     | 5.5. Do the different components of the study adhere to the quality criteria of each tradition of the methods involved? | Can't tell       |
|                     | <b>Quality score</b>                                                                                                    | <b>Low (2/5)</b> |

review only

## MMAT results - studies investigating user experience

|                        | Qualitative Studies                                                                                | J Goode<br>2011 | Ewa<br>Winneby<br>2012 | A<br>Björkman<br>2018 | J Goode<br>2004 |
|------------------------|----------------------------------------------------------------------------------------------------|-----------------|------------------------|-----------------------|-----------------|
| Screening<br>questions | S1. Are there clear research questions?                                                            | Yes             | Yes                    | Yes                   | Yes             |
|                        | S2. Do the collected data allow to address the research questions?                                 | Yes             | Yes                    | Yes                   | Yes             |
| Quality criteria       | 1.1. Is the qualitative approach appropriate to answer the research question?                      | Yes             | Yes                    | Yes                   | Yes             |
|                        | 1.2. Are the qualitative data collection methods adequate to address the research question?        | Yes             | Yes                    | Yes                   | Yes             |
|                        | 1.3. Are the findings adequately derived from the data?                                            | Can't tell      | Can't tell             | Yes                   | Yes             |
|                        | 1.4. Is the interpretation of results sufficiently substantiated by data?                          | Yes             | Yes                    | Yes                   | Yes             |
|                        | 1.5. Is there coherence between qualitative data sources, collection, analysis and interpretation? | Yes             | Yes                    | Yes                   | Yes             |
|                        | Quality score                                                                                      | High (4/5)      | High (4/5)             | High (5/5)            | High (5/5)      |

view only

|                     | Quantitative descriptive studies                                              | A O'Cathain 2014 | M Rahmqvist 2011 |
|---------------------|-------------------------------------------------------------------------------|------------------|------------------|
| Screening questions | S1. Are there clear research questions?                                       | Yes              | Yes              |
|                     | S2. Do the collected data allow to address the research questions?            | Yes              | Yes              |
| Quality criteria    | 4.1. Is the sampling strategy relevant to address the research question?      | Yes              | Yes              |
|                     | 4.2. Is the sample representative of the target population?                   | Can't tell       | Can't tell       |
|                     | 4.3. Are the measurements appropriate?                                        | Yes              | Yes              |
|                     | 4.4. Is the risk of nonresponse bias low?                                     | No               | No               |
|                     | 4.5. Is the statistical analysis appropriate to answer the research question? | Yes              | Yes              |
|                     | Quality score                                                                 | Medium (3/5)     | Medium (3/5)     |

Review only

1  
2  
3  
4  
5  
6  
7  
8  
9  
10  
11  
12  
13  
14  
15  
16  
17  
18  
19  
20  
21  
22  
23  
24  
25  
26  
27  
28  
29  
30  
31  
32  
33  
34  
35  
36  
37  
38  
39  
40  
41  
42  
43  
44  
45  
46

|                                                                                                                         |                   |
|-------------------------------------------------------------------------------------------------------------------------|-------------------|
| <b>Mixed methods study</b>                                                                                              | A McAteer<br>2016 |
| S1. Are there clear research questions?                                                                                 | Yes               |
| S2. Do the collected data allow to address the research questions?                                                      | Yes               |
| 5.1. Is there an adequate rationale for using a mixed methods design to address the research question?                  | Yes               |
| 5.2. Are the different components of the study effectively integrated to answer the research question?                  | Yes               |
| 5.3. Are the outputs of the integration of qualitative and quantitative components adequately interpreted?              | Yes               |
| 5.4. Are divergences and inconsistencies between quantitative and qualitative results adequately addressed?             | Yes               |
| 5.5. Do the different components of the study adhere to the quality criteria of each tradition of the methods involved? | Yes               |
| <b>Quality score</b>                                                                                                    | <b>High (5/5)</b> |

For peer review only

Supplementary table 1: Characteristics of patients and triage advice (9 studies that utilised routine data analysis)

| Reference | First author            | Sample / Staff data size conducting | Participants       | Key findings relating caller/patient characteristics and triage advice                                                                                                                                                                                                                                                                                                                                                                                                                                                                                                                                                                                                                                                                                                                                                                                                                                                                               |
|-----------|-------------------------|-------------------------------------|--------------------|------------------------------------------------------------------------------------------------------------------------------------------------------------------------------------------------------------------------------------------------------------------------------------------------------------------------------------------------------------------------------------------------------------------------------------------------------------------------------------------------------------------------------------------------------------------------------------------------------------------------------------------------------------------------------------------------------------------------------------------------------------------------------------------------------------------------------------------------------------------------------------------------------------------------------------------------------|
| 23        | Payne 2001<br>England   | 56,450 Nurse calls                  | General population | <p><b>Patient/symptom characteristics</b></p> <ul style="list-style-type: none"> <li>• The patient was the caller in 45% of calls; 31% of calls were made by parents calling on behalf of their child. • 24% of calls were about 0-5 year olds. 22% were for 17-29 years, and 22% for 30-39 years.</li> </ul> <p><b>Triage advice and urgency</b></p> <ul style="list-style-type: none"> <li>• Urgency increased with age: 0-5 year olds were more likely to be categorised as "no urgency", 17-39 years were more likely to be "routine", and over 70s were more likely to be categorised as urgent.</li> <li>• 56% of calls were prioritised as "no urgency", 32% were categorised as having some degree of urgency, and 11% were routine; 37% of patients were advised to self-care</li> <li>• Males were more likely to be categorised as urgent; females were more likely to be referred to community services or given information.</li> </ul> |
| 5         | Elliot 2015<br>Scotland | 1,285,038 Nurse calls               | General population | <p><b>Patient/symptom characteristics:</b></p> <ul style="list-style-type: none"> <li>• Abdominal problems accounted for the largest proportion of calls (12.2%) followed by dental (6.8%) and rash/skin problems (6.0%).</li> <li>• Problems differed by age group. Rash/skin problems were most frequent in the under 5's, abdominal problems most frequent in 5-74, and breathing problems most frequent in over 75s.</li> <li>• Less affluent users tended to contact the service less often compared to affluent users, exceptions were for throat problems, genitourinary, eye problems and fever.</li> </ul> <p><b>Triage advice and urgency:</b></p>                                                                                                                                                                                                                                                                                         |

• Out of hours calls most frequently resulted in: advice to visit an out-of-hours centre (34.1%), followed by a GP home visit (12.2%) or self-care advice being provided (10.2%). Whereas in-hours calls mainly resulted in: advice to contact a dentist (27.6%), a NHS 24 service clinician calling the patient (21.1%) or advice to contact a GP (19.2%).

|                                                                                                          |                                                   |                                                                       |                                                         |                                                                                    |                                                                                                                                                                                                                                                                                                                                                                                                                                                                                                                                                                                                                   |
|----------------------------------------------------------------------------------------------------------|---------------------------------------------------|-----------------------------------------------------------------------|---------------------------------------------------------|------------------------------------------------------------------------------------|-------------------------------------------------------------------------------------------------------------------------------------------------------------------------------------------------------------------------------------------------------------------------------------------------------------------------------------------------------------------------------------------------------------------------------------------------------------------------------------------------------------------------------------------------------------------------------------------------------------------|
| 1<br>2<br>3<br>4<br>5<br>6<br>7<br>8<br>9<br>10<br>11<br>12<br>13<br>14<br>15<br>16<br>17                | <b>Zwaanswijk<br/>2015<br/>Netherlands<br/>25</b> | 895 253<br>patients<br>(within<br>General<br>practice<br>cooperative) | Nurse<br>(within<br>General<br>practice<br>cooperative) | General<br>population                                                              | <b>Triage advice and urgency:</b><br>• Urgency variation was symptom specific: For Cystitis/Urinary Infections: 93.4% of variation ascribed to differing patient characteristics. For cystitis urgency was significantly lower for females and lower for adult patients; for lacerations and cuts: urgency significantly higher for patients over 5 years old than for younger children • Higher variation in urgency occurred at lowest two urgency levels.                                                                                                                                                      |
| 18<br>19<br>20<br>21<br>22<br>23<br>24<br>25<br>26<br>27<br>28                                           | <b>Njeru<br/>2017<br/>USA<br/>7</b>               | 587 cases<br>587<br>controls                                          | Nurse                                                   | Adult callers<br>with and<br>without<br>limited<br>English<br>proficiency<br>(LEP) | <b>Triage advice and urgency:</b><br>• Nurse recommendations for higher urgency care, (ambulance, visit the ED, or schedule an acute appointment) were more frequent for limited English proficiency callers (LEP) callers than non-LEP callers (49.4% versus 39.0%; $P < 0.0004$ ), differences remained significant after adjustment for co-morbidities.<br>• The LEP patients were less likely to follow the recommendations given by the nurse, n (%): 339 (60.9%) versus 379 (69.4%) - even after adjusting for sex, co-morbidity, caller type (self or surrogate), duration of call, and recommended action |
| 29<br>30<br>31<br>32<br>33<br>34<br>35<br>36<br>37<br>38<br>39<br>40<br>41<br>42<br>43<br>44<br>45<br>46 | <b>Jacome<br/>2018<br/>Portugal<br/>24</b>        | 148,099<br>calls                                                      | Nurse                                                   | General<br>population<br>(Older age<br>groups 65+)                                 | <b>Patient/symptom characteristics:</b><br>• Majority of users were female (63% vs. 37%), most users were younger than 80 years old (60.6% vs. 39.4%). Mean age: 77.3.<br>• Most common symptoms were: pain (18.1%), respiratory tract infections (11.9%), digestive problems (8.6%), diabetes mellitus (6.4%)<br><b>Triage urgency and advice</b><br>Users in the “oldest old” group were more often referred to ED (51% vs. 40% of those in the “65–79 age” group) and less often advised to rely on self-care (11% vs. 15%).                                                                                   |

|    |                |         |       |              |                                                                                                                                                                                                                                                                                                                                                                                                                         |
|----|----------------|---------|-------|--------------|-------------------------------------------------------------------------------------------------------------------------------------------------------------------------------------------------------------------------------------------------------------------------------------------------------------------------------------------------------------------------------------------------------------------------|
| 1  |                |         |       |              |                                                                                                                                                                                                                                                                                                                                                                                                                         |
| 2  |                |         |       |              |                                                                                                                                                                                                                                                                                                                                                                                                                         |
| 3  | <b>Hsu</b>     | 402,959 | Nurse | Older age    | <b>Patient/Symptom characteristics</b>                                                                                                                                                                                                                                                                                                                                                                                  |
| 4  | <b>2011</b>    | calls   |       | groups       | <ul style="list-style-type: none"> <li>• The age of the callers ranged from 65 to 109 years (mean = 76.78; median = 76; Standard Deviation = 7.856; mode = 65). During the study period, the estimated proportion of people aged 65 years and over was approximately 16% of the England and Wales population, but accounted for only 7.2% of service use.</li> </ul>                                                    |
| 5  | <b>England</b> | about   |       | (aged over   | <ul style="list-style-type: none"> <li>• Amongst older adults, service use increased with age, with higher use among women than men</li> </ul>                                                                                                                                                                                                                                                                          |
| 6  | <b>21</b>      | older   |       | 65 years)    |                                                                                                                                                                                                                                                                                                                                                                                                                         |
| 7  |                | people  |       |              |                                                                                                                                                                                                                                                                                                                                                                                                                         |
| 8  |                | (In 12- |       |              |                                                                                                                                                                                                                                                                                                                                                                                                                         |
| 9  |                | month   |       |              |                                                                                                                                                                                                                                                                                                                                                                                                                         |
| 10 |                | study   |       |              |                                                                                                                                                                                                                                                                                                                                                                                                                         |
| 11 |                | period) |       |              |                                                                                                                                                                                                                                                                                                                                                                                                                         |
| 12 |                |         |       |              | <b>Triage advice and urgency</b>                                                                                                                                                                                                                                                                                                                                                                                        |
| 13 |                |         |       |              | Overall, the largest advice category was to visit GP, primary care service (PCS) or dentist on the same day: 28%, (n = 112,778), followed by home care 25.4% (n = 102,406) and being advised to see their GP, PCS or dentist, either routinely, 15.2%(n = 61,419) or urgently 14.7% (n = 59,154), being referred to the emergency service 6.9% (n = 27,612), ED 5.4%(n = 21,650) and community services 2% (n = 7,931). |
| 14 |                |         |       |              |                                                                                                                                                                                                                                                                                                                                                                                                                         |
| 15 |                |         |       |              |                                                                                                                                                                                                                                                                                                                                                                                                                         |
| 16 |                |         |       |              |                                                                                                                                                                                                                                                                                                                                                                                                                         |
| 17 |                |         |       |              |                                                                                                                                                                                                                                                                                                                                                                                                                         |
| 18 |                |         |       |              |                                                                                                                                                                                                                                                                                                                                                                                                                         |
| 19 |                |         |       |              |                                                                                                                                                                                                                                                                                                                                                                                                                         |
| 20 |                |         |       |              |                                                                                                                                                                                                                                                                                                                                                                                                                         |
| 21 | <b>Cook</b>    | 358 503 | Nurse | children     | <b>Patient and symptom characteristics</b>                                                                                                                                                                                                                                                                                                                                                                              |
| 22 | <b>2013</b>    | calls   |       | aged 0–15    | <ul style="list-style-type: none"> <li>• For infants aged &lt;1, highest call rates were found for ‘crying’</li> </ul>                                                                                                                                                                                                                                                                                                  |
| 23 | <b>England</b> |         |       | (<1, 1–3 and | <ul style="list-style-type: none"> <li>• High call rates were also found for symptoms relating to ‘skin/hair/ nails’ and ‘colds/flu/sickness’ for all age groups; self-care and health information was provided to 59.7% and 51.4% of these cases respectively.</li> </ul>                                                                                                                                              |
| 24 | <b>20</b>      |         |       | 4–15 years)) |                                                                                                                                                                                                                                                                                                                                                                                                                         |
| 25 |                |         |       |              | <b>Triage advice and urgency</b>                                                                                                                                                                                                                                                                                                                                                                                        |
| 26 |                |         |       |              | <ul style="list-style-type: none"> <li>• 47% calls made on behalf of children aged &lt;1, 48.7% of calls for children 1–3 and 43.9% of calls for children aged 4–15 were managed with no onward referral needed by giving health information and advice</li> </ul>                                                                                                                                                      |
| 27 |                |         |       |              | <ul style="list-style-type: none"> <li>• For children aged &lt;1, only 7% of calls were forwarded to A&amp;E, which was markedly higher for children aged 1–3 (12.3%) and for children aged 4–15 (13.5%). However, for GP outcomes (urgent/same day/routine), this was higher for children aged &lt;1 (30%) than for children aged 1–3 (24.5%) and 4–15 (23.5%)</li> </ul>                                              |
| 28 |                |         |       |              | <ul style="list-style-type: none"> <li>• The symptoms which contributed to the highest number of high urgency calls related to ‘respiratory tract’ (n=840, 5.1%, ASR=32.7) and ‘neurological disorders’ (n=51, 8.4%,</li> </ul>                                                                                                                                                                                         |
| 29 |                |         |       |              |                                                                                                                                                                                                                                                                                                                                                                                                                         |
| 30 |                |         |       |              |                                                                                                                                                                                                                                                                                                                                                                                                                         |
| 31 |                |         |       |              |                                                                                                                                                                                                                                                                                                                                                                                                                         |
| 32 |                |         |       |              |                                                                                                                                                                                                                                                                                                                                                                                                                         |
| 33 |                |         |       |              |                                                                                                                                                                                                                                                                                                                                                                                                                         |
| 34 |                |         |       |              |                                                                                                                                                                                                                                                                                                                                                                                                                         |
| 35 |                |         |       |              |                                                                                                                                                                                                                                                                                                                                                                                                                         |
| 36 |                |         |       |              |                                                                                                                                                                                                                                                                                                                                                                                                                         |
| 37 |                |         |       |              |                                                                                                                                                                                                                                                                                                                                                                                                                         |
| 38 |                |         |       |              |                                                                                                                                                                                                                                                                                                                                                                                                                         |
| 39 |                |         |       |              |                                                                                                                                                                                                                                                                                                                                                                                                                         |
| 40 |                |         |       |              |                                                                                                                                                                                                                                                                                                                                                                                                                         |
| 41 |                |         |       |              |                                                                                                                                                                                                                                                                                                                                                                                                                         |
| 42 |                |         |       |              |                                                                                                                                                                                                                                                                                                                                                                                                                         |
| 43 |                |         |       |              |                                                                                                                                                                                                                                                                                                                                                                                                                         |
| 44 |                |         |       |              |                                                                                                                                                                                                                                                                                                                                                                                                                         |
| 45 |                |         |       |              |                                                                                                                                                                                                                                                                                                                                                                                                                         |
| 46 |                |         |       |              |                                                                                                                                                                                                                                                                                                                                                                                                                         |

ASR=12.1)

|                                             |                                                      |              |                                                                                       |                                                                                                                                                                                                                                                                                                                                                                                                                                                                                                                                                                                                                                                                                                                                                                                                                                                                                                                                                                                                                                                                                                                                                                                                                                                                                                 |
|---------------------------------------------|------------------------------------------------------|--------------|---------------------------------------------------------------------------------------|-------------------------------------------------------------------------------------------------------------------------------------------------------------------------------------------------------------------------------------------------------------------------------------------------------------------------------------------------------------------------------------------------------------------------------------------------------------------------------------------------------------------------------------------------------------------------------------------------------------------------------------------------------------------------------------------------------------------------------------------------------------------------------------------------------------------------------------------------------------------------------------------------------------------------------------------------------------------------------------------------------------------------------------------------------------------------------------------------------------------------------------------------------------------------------------------------------------------------------------------------------------------------------------------------|
| <p><b>North<br/>2010<br/>USA<br/>22</b></p> | <p>20,230<br/>calls over<br/>a 2 year<br/>period</p> | <p>Nurse</p> | <p>General<br/>population<br/>(users with<br/>insurance<br/>and<br/>subscription)</p> | <p><b>Patient characteristics (seriousness of symptoms as investigated through hospitalisation rates).</b></p> <p>This study compared hospitalisation rates in 3 groups, patients who: 1) were digitally triaged, 2) made a GP visit and 3) attended ED.</p> <ul style="list-style-type: none"> <li>•Triaged patients are more likely to result in hospitalisation as compared to those visiting a GP; but less likely than those attending ED. •3% (n=547) of callers were hospitalised.</li> <li>•Hospitalisation rate varied by age: low (2%) for ages 3 – 17 to high (10%) for 65+</li> <li>•Hospitalisation following triage call occurred quickly: 77% occurred with 48 hours of the call</li> <li>•Those aged 65 years + were 5 times more likely to have problems requiring hospital admission when presenting to the ED compared to callers.</li> <li>•Symptom calls in the 65 years and older age group had hospitalization rates close to 10%.</li> <li>•Findings relating to symptoms: for adult abdominal pain, rates of hospitalisation between callers and ED attendees were similar.</li> <li>•There was a higher proportion of female callers compared to female ED attendees and GP visits (females made up 72% of callers, 61% of GP visits and 56% of ED visits)</li> </ul> |
|---------------------------------------------|------------------------------------------------------|--------------|---------------------------------------------------------------------------------------|-------------------------------------------------------------------------------------------------------------------------------------------------------------------------------------------------------------------------------------------------------------------------------------------------------------------------------------------------------------------------------------------------------------------------------------------------------------------------------------------------------------------------------------------------------------------------------------------------------------------------------------------------------------------------------------------------------------------------------------------------------------------------------------------------------------------------------------------------------------------------------------------------------------------------------------------------------------------------------------------------------------------------------------------------------------------------------------------------------------------------------------------------------------------------------------------------------------------------------------------------------------------------------------------------|

|                                             |                          |              |                                                |                                                                                                                                                                                                                                                                                                                                                                                                                                                                                                                                                                                                                                                                     |
|---------------------------------------------|--------------------------|--------------|------------------------------------------------|---------------------------------------------------------------------------------------------------------------------------------------------------------------------------------------------------------------------------------------------------------------------------------------------------------------------------------------------------------------------------------------------------------------------------------------------------------------------------------------------------------------------------------------------------------------------------------------------------------------------------------------------------------------------|
| <p><b>North<br/>2010<br/>USA<br/>19</b></p> | <p>163,608<br/>calls</p> | <p>Nurse</p> | <p>General<br/>population<br/><br/>(users)</p> | <p><b>Patient/symptom characteristics</b></p> <ul style="list-style-type: none"> <li>• Study compared surrogate (calls made by someone on behalf of the patient) calls to self calls, made by the patient themselves</li> </ul> <p>Adult calls accounted for 105,866 (65%) of the total calls, of these, 14,646 (14%) were made by surrogate; men and the elderly were the two most over-represented groups in surrogate calls</p> <ul style="list-style-type: none"> <li>• For surrogate calls, the top 5 symptoms were: abdominal pain, vomiting or nausea, other, skin problems, dizziness. In self calls the top symptoms were: abdominal pain, skin</li> </ul> |
|---------------------------------------------|--------------------------|--------------|------------------------------------------------|---------------------------------------------------------------------------------------------------------------------------------------------------------------------------------------------------------------------------------------------------------------------------------------------------------------------------------------------------------------------------------------------------------------------------------------------------------------------------------------------------------------------------------------------------------------------------------------------------------------------------------------------------------------------|



1  
2  
3  
4  
5  
6  
7  
8  
9  
10  
11  
12  
13  
14  
15  
16  
17  
18  
19  
20  
21  
22  
23  
24  
25  
26  
27  
28  
29  
30  
31  
32  
33  
34  
35  
36  
37  
38  
39  
40  
41  
42  
43  
44  
45  
46

problems, chest pain, other, eye or vision problems.

- Vomiting or nausea, dizziness or light-headedness, and other were significantly more likely to be reported by surrogate callers. Abdominal pain, skin problems, chest pain, and eye or vision problems were significantly more likely to be reported by self callers

- Surrogate calls, as a percent of total calls by age group, increased with the age of the patient
- Calls concerning women patients made up 70% (n=74,069) of all adult calls, of which 9% (n=6780) were made by surrogates. Of the 31,797 calls about male patients, 25% (n=7866) were made by surrogates. Overall, males were the subject of 54% of surrogate calls and 26% of self calls.

#### **Triage advice and urgency**

- Emergency advice was recommended 28% (n=29,371) of all calls. 38% (n= 5545) of surrogate calls ended with this nurse recommendation compared to 26% (n=23,826) of self calls (OR 1.72; 95% CI 1.66 to 1.79).

- Advice urgency increased with age for both surrogates and self calls

Supplementary table 2: Change in wider healthcare service use following digital triage implementations (8 studies)

| First author<br>Year<br>Country<br>Reference | Study type                                    | Sample / data size                                                                                            | Staff conducting digital triage             | Participants       | Comparator                                | Findings relating to change in wider health care service use (primary care, hospitalisations, ambulance services, ED attendance)                                                                                                                                                                                                                                                                                                                                                                                                                                                              |
|----------------------------------------------|-----------------------------------------------|---------------------------------------------------------------------------------------------------------------|---------------------------------------------|--------------------|-------------------------------------------|-----------------------------------------------------------------------------------------------------------------------------------------------------------------------------------------------------------------------------------------------------------------------------------------------------------------------------------------------------------------------------------------------------------------------------------------------------------------------------------------------------------------------------------------------------------------------------------------------|
| Lattimer<br>2000<br>England<br>32            | Cost effectiveness report of controlled trial | >14000<br>Control group (n = 7308 calls)<br>Intervention group (Nurse telephone consultation): (n=7184 calls) | Nurse (within general practice cooperative) | General population | Usual care (referral to a GP)             | <b>Primary care:</b> During intervention period GPs made 428 fewer home visits, generating savings of £3360 (£2578 to £4198) in a year.<br><b>Hospitalisations:</b> The cost of providing nurse telephone consultation was £81 237 per annum; cost savings were estimated to be £94 422 due to reduction of other costs for the NHS arising from reduced emergency admissions to hospital.                                                                                                                                                                                                    |
| Munro<br>2000<br>England<br>29               | Routine data analysis                         | Study corresponds to the 1st year of operation: 68 500 NHS direct calls from the 1.3 million people served.   | Nurse                                       | General population | Service use in regions with no NHS direct | <b>Primary care:</b> There was a significant decrease in use of GP cooperatives at sites using digital triage: change in estimated trend from increase of 2.0% per month before to – 0.8% afterwards (estimated relative change – 2.9% (95% confidence interval (CI)– 4.2% to – 1.5%). compared to negligible change in control: from 0.8% a month before to 0.9% afterwards (relative change 0.1%; CI: – 0.9% to 1.1%))<br><b>Ambulance services:</b> Changes in trends were small and non-significant<br><b>ED attendances:</b> Changes in trends were small, variable and not significant. |

|                                                                                                       |                                           |                                                                 |                                                                                        |                                       |                                                                  |                                                                  |                                                                                                                                                                                                                                                                                                                                                                                                                                                                                                                                                                                                                                                                                          |
|-------------------------------------------------------------------------------------------------------|-------------------------------------------|-----------------------------------------------------------------|----------------------------------------------------------------------------------------|---------------------------------------|------------------------------------------------------------------|------------------------------------------------------------------|------------------------------------------------------------------------------------------------------------------------------------------------------------------------------------------------------------------------------------------------------------------------------------------------------------------------------------------------------------------------------------------------------------------------------------------------------------------------------------------------------------------------------------------------------------------------------------------------------------------------------------------------------------------------------------------|
| 1<br>2<br>3<br>4<br>5<br>6<br>7<br>8<br>9<br>10<br>11<br>12<br>13<br>14<br>15<br>16<br>17<br>18<br>19 | <b>Dale<br/>2003<br/>England<br/>36</b>   | Controlled trial                                                | 635 calls digitally triaged by ambulance service; 611 non-triaged calls                | Nurse and paramedic                   | Callers to emergency service for non-emergency concern (aged 2+) | Usual care (ambulance dispatch)                                  | <b>Ambulance services:</b> 52% (n=330) of calls were triaged as not requiring emergency ambulance. Of these: 47% had moderate urgency: care needed within 24 hours; 26% needed a routine appointment; 27% self care sufficient. Overall, 9.8% of ambulances were cancelled in the intervention groups (where this was offered).<br><b>ED attendances:</b> In the intervention group: 81% of patients triaged as requiring ambulance call outs attended ED; 63.4% of patients triaged as not requiring ambulance attended ED.<br><b>Hospitalisations:</b> Some inconsistency in triage: 10% of those triaged as not requiring ambulance dispatch subsequently required hospital admission |
| 20<br>21<br>22<br>23<br>24<br>25<br>26<br>27<br>28<br>29<br>30<br>31<br>32<br>33                      | <b>Mark<br/>2003<br/>England<br/>46</b>   | Mixed methods (routine data analysis + observation, interviews) | Numbers of calls analysed across three years: 5126 (year 1998) 5702 (1999) 4698 (2000) | Nurse                                 | General population                                               | Service use before implementation                                | <b>Primary care:</b> Two main 'transitions': 1. Initial increase in GP cooperative workload and in-hours calls. Followed by fall in OOH GP cooperative workload by 18%. Use of primary care centres declined following the arrival of NHS Direct; allocation of home visits initially increased then decreased; OOH doctor advice progressively increased. Within older age groups: decline in both use of primary care centres and home visits, but a rise in doctor advice.<br><b>ED attendances:</b> Progressive increase in ED attendance                                                                                                                                            |
| 34<br>35<br>36<br>37<br>38<br>39<br>40<br>41<br>42<br>43<br>44<br>45<br>46                            | <b>Dunt<br/>2005<br/>Australia<br/>30</b> | Four controlled trials                                          | Random sampling (350 households per trial site)                                        | Nurse (Two "standalone" call centres) | General population                                               | 1. Service use before implementation<br>2. Implementation of two | <b>Primary care:</b> Some types of out of hours care became more frequent in sites using digital triage services<br><b>Ambulance services:</b> Overall no change in any site                                                                                                                                                                                                                                                                                                                                                                                                                                                                                                             |

|                                                                                                                                           |                                       |                                                 |                                                                                                                                   |                                     |                                                                                        |                                                                                                                                                                                                                                                                                                                                                                                                                                                                                                                                                                                                                                                             |
|-------------------------------------------------------------------------------------------------------------------------------------------|---------------------------------------|-------------------------------------------------|-----------------------------------------------------------------------------------------------------------------------------------|-------------------------------------|----------------------------------------------------------------------------------------|-------------------------------------------------------------------------------------------------------------------------------------------------------------------------------------------------------------------------------------------------------------------------------------------------------------------------------------------------------------------------------------------------------------------------------------------------------------------------------------------------------------------------------------------------------------------------------------------------------------------------------------------------------------|
|                                                                                                                                           |                                       |                                                 |                                                                                                                                   |                                     | telephone triage sites within existing 'embedded services' using paper based protocols |                                                                                                                                                                                                                                                                                                                                                                                                                                                                                                                                                                                                                                                             |
| 1<br>2<br>3<br>4<br>5<br>6<br>7<br>8<br>9<br>10<br>11<br>12<br>13<br>14<br>15<br>16<br>17<br>18<br>19<br>20<br>21<br>22<br>23<br>24<br>25 | <b>Munro 2005 England 28</b>          | Surveys with care providers                     | 571 surveys sent (188/297) responses from GP cooperatives, (35/35) for ambulance services and (200/239) for emergency departments | Nurse                               | General population                                                                     | Service use before implementation<br><br><b>Primary care:</b> The 3 year period following digital triage implementation was associated with a reduction in calls to OOH general practice. In the context of an underlying trend of demand rising by about 1% each year, the introduction of digital triage was associated with an immediate 3% fall in demand coupled with a reversal of the trend so that demand began to fall by almost 8% per year<br><b>Ambulance services:</b> No significant change in emergency ambulance service use.<br><b>ED attendances:</b> There was negligible change in use of emergency departments,.                       |
| 26<br>27<br>28<br>29<br>30<br>31<br>32<br>33<br>34<br>35<br>36<br>37<br>38<br>39<br>40<br>41<br>42<br>43<br>44<br>45<br>46                | <b>Morimura 2010 Japan (Tokyo) 35</b> | Routine data analysis (+ surveys with patients) | 26,138 telephone consultations                                                                                                    | Nurse and non-clinical call handler | General population                                                                     | Service before implementation,<br><br><b>Ambulance services:</b> Number of ambulances used per 1 million was statistically reduced compared with that of the previous year: 46 846 vs. 44 689, $p < 0.0001$ . The out of hours ambulance use per 1 million people was also significantly reduced: 31 965 vs. 30 370.<br><b>Hospitalisations:</b> In those who were referred to a hospital by an ambulance (n =3252) 30.8% (1000 cases) were hospitalised. The emergency hospitalisation rate (EHR) decreased annually before the introduction of digital triage service. However, the rate after its introduction was statistically higher 36.5% vs. 37.8%, |

p<0.0001)(EHR increased following the introduction of the service).

**Turner  
2013  
England  
38**

Routine data  
analysis

400,000 calls  
in first year  
of operation  
analysed.

Non-clinical  
call handler

General population

Control sites  
selected to  
match  
equivalent  
geographical  
areas

**Primary care:** In one site - statistically significant reduction in urgent care attendances; 3 sites: reduction in calls to former (nurse led) digital triage service. Overall no change in primary care could be attributed to implementation  
**Ambulance services:** Reduction in ambulance emergency calls in 1 site and an increase in another site; All sites showed increase in emergency ambulance incidents. Overall no change in emergency service (999) calls were attributable to implementation  
**ED attendances:** Overall no change could be attributed to implementation

Supplementary table 3: Studies investigating patient level outcomes: service use, adherence with advice and hospitalisations (6 studies)

| First author<br>Year<br>Country<br>Reference | Study design                         | Sample / data size                                | Staff conducting digital triage | Participants                            | Comparison groups used in analyses                                                                                                                                           | Key patient level service use findings                                                                                                                                                                                                                                                                                                                                                                                                                                                                                                                                                                                                                                                                  |
|----------------------------------------------|--------------------------------------|---------------------------------------------------|---------------------------------|-----------------------------------------|------------------------------------------------------------------------------------------------------------------------------------------------------------------------------|---------------------------------------------------------------------------------------------------------------------------------------------------------------------------------------------------------------------------------------------------------------------------------------------------------------------------------------------------------------------------------------------------------------------------------------------------------------------------------------------------------------------------------------------------------------------------------------------------------------------------------------------------------------------------------------------------------|
| <b>Foster 2003<br/>England<br/>27</b>        | Routine data analysis & data linkage | 4493 calls, of which 193 were advised to go to ED | Nurse                           | General population                      | Three groups:<br>1) Callers triaged to ED who attended ED<br>2) Callers triaged to ED, who did not attend<br>3) Callers who received different triage advice who attended ED | <b>ED Attendance</b> 8 % (358 of 4493) of callers were advised to attend ED. Of these, where data was available, 64.2% (124 of 193) followed the advice to visit ED with the same presenting complaint.<br>• 2.4% (99 of 4135) went to ED for the same presenting complaint as their contact following triage despite being given other advice<br><b>Hospitalisations</b> 66.9% (83 of 124) of those attending ED after being advised to were sent home without further referral. However, 10 were referred on within the hospital and seven were admitted. 0.3% of callers (15 of 4235) who were not advised to attend A&E and were subsequently admitted raised concerns about the quality of triage. |
| <b>Sprivulis 2004<br/>Australia<br/>34</b>   | Routine data analysis & data linkage | 13,019 presentations to ED                        | Nurse                           | General population                      | Two groups:<br>1) ED users called a digital triage service in 24 hours prior to attending ED<br>2) ED users not digitally triaged                                            | <b>ED Attendance</b> 6.5% (842 of 13019) of patients attending ED had contacted the digital triage service in 24 hours prior to attendance.<br><b>Hospitalisations</b> For those triaged to 'immediate/prompt care' and 'non-urgent' care by HD and who presented to the ED (in the latter group, against the triage advice), there was a similar hospital admissions rate and ED triage distribution.                                                                                                                                                                                                                                                                                                  |
| <b>Stewart 2006<br/>England<br/>37</b>       | Routine data analysis & data linkage | 3312 calls to NHS Direct North West Coast,        | Nurse                           | Children and young adults aged under 16 | Two main matched patient groups:<br>1) Patients advised, through digital triage, to attend A&E in the last 12                                                                | <b>ED Attendance</b> •88% of those digitally triaged to attend ED did so within 1 hour. • 88% of those advised to take another course of action attended A&E within 4 hours.<br>• Some indication that those triaged presented with higher urgency complaints, based on higher urgency advice within ED triage using "Manchester triage group 5-point system" for digitally                                                                                                                                                                                                                                                                                                                             |

|                                                                                                                |                                               |                                                                                                                                       |                                                                           |       |                                                                                                                                                                                                             |                                                                                                                                                                                                                                                                                                                                                                                                                                                              |                                                                                                                                                                                                                                                                                                                                                                                                                                                                                                                                                                        |
|----------------------------------------------------------------------------------------------------------------|-----------------------------------------------|---------------------------------------------------------------------------------------------------------------------------------------|---------------------------------------------------------------------------|-------|-------------------------------------------------------------------------------------------------------------------------------------------------------------------------------------------------------------|--------------------------------------------------------------------------------------------------------------------------------------------------------------------------------------------------------------------------------------------------------------------------------------------------------------------------------------------------------------------------------------------------------------------------------------------------------------|------------------------------------------------------------------------------------------------------------------------------------------------------------------------------------------------------------------------------------------------------------------------------------------------------------------------------------------------------------------------------------------------------------------------------------------------------------------------------------------------------------------------------------------------------------------------|
|                                                                                                                |                                               | and<br>14,029<br>patients<br>who<br>attended<br>ED (<br>between<br>the 1st of<br>December<br>2002 and<br>28th of<br>February<br>2003) |                                                                           |       | hours (n = 299)<br>2) Patients given<br>alternative triage<br>advice, but who<br>still attended ED<br>(n=163)<br>Additional groups:<br>Those attending ED<br>who were GP<br>referred and self-<br>referred. | triaged patients, compared to self-referrals.<br>•74% of digitally triaged patients were discharged home<br>compared to 56% of those referred by GPs and 64% of those who<br>self referred.<br><br>• <b>Hospitalisations:</b> 27% of GP referrals, 10% of the self-referral<br>group and 15% of NHS Direct referrals were admitted. Of those<br>admitted patients referred by NHS Direct 52% were advised to<br>attend A&E, and 48% were given other advice. |                                                                                                                                                                                                                                                                                                                                                                                                                                                                                                                                                                        |
| 18<br>19<br>20<br>21<br>22<br>23<br>24<br>25<br>26<br>27                                                       | <b>Byrne<br/>2007<br/>England<br/>26</b>      | Surveys                                                                                                                               | 268<br>callers                                                            | Nurse | Calls about<br>abdominal<br>pain,<br>cough or<br>sore<br>throat                                                                                                                                             | None                                                                                                                                                                                                                                                                                                                                                                                                                                                         | <b>General Practice use</b> Among callers digitally triaged to self-care,<br>93% (64 of 69) reported that they had followed the advice to look<br>after themselves at home, while five 7% (5 of 69) reported that<br>they had chosen not to do so. Of the five, three said they had<br>decided to go to their GP because, despite the advice of NHS<br>Direct, they thought the condition was sufficiently severe to<br>require such a visit. A further two said that their condition<br>deteriorated after being triaged, so they then decided to contact<br>their GP |
| 28<br>29<br>30<br>31<br>32<br>33<br>34<br>35<br>36<br>37<br>38<br>39<br>40<br>41<br>42<br>43<br>44<br>45<br>46 | <b>Siddiqui<br/>2019<br/>Australia<br/>39</b> | Routine<br>data<br>analysis<br>& data<br>linkage                                                                                      | 12,741<br>triaged<br>cases<br>linked to<br>72,577 ED<br>presentati<br>ons | Nurse | General<br>population                                                                                                                                                                                       | n/a                                                                                                                                                                                                                                                                                                                                                                                                                                                          | <b>ED Attendance</b> • Compliance with ED attendance advice was<br>between 29-69% • There was higher compliance if ambulance was<br>advised (53-69%) and • lowest compliance when self-transport to<br>ED was recommended (29%). • Appropriateness of attendance to<br>ED for those using TTAC was comparable to those who hadn't<br>been triaged by TTAC.<br>• 4% of ED presentations between 2016-2017 had contacted the<br>digital triage service                                                                                                                   |

|                                              |         |                                    |       |                        |                                                                                                      |                                                                                                                                                                                                                                                                                                                                                                                                                                                                                                                                                       |
|----------------------------------------------|---------|------------------------------------|-------|------------------------|------------------------------------------------------------------------------------------------------|-------------------------------------------------------------------------------------------------------------------------------------------------------------------------------------------------------------------------------------------------------------------------------------------------------------------------------------------------------------------------------------------------------------------------------------------------------------------------------------------------------------------------------------------------------|
| <b>Turbitt<br/>2015<br/>Australia<br/>31</b> | Surveys | 1150<br>parents<br>attending<br>ED | Nurse | Parents of<br>children | Some comparisons<br>between parents<br>who called and did<br>not call the digital<br>triage service. | <b>ED Attendance</b> • 20% (230 of 1150) of parents had called the digital triage service ahead of ED attendance for their child's lower urgency concern • 70% of those digitally triaged attended ED because they were advised to attend. • 22% of those digitally triaged attended ED because they were still worried after receiving alternative digital triage advice (not to attend). • Of overall ED users: 16% of respondents had not heard of the digital triage service; 53% were aware of the service, but thought it would not be helpful. |
|----------------------------------------------|---------|------------------------------------|-------|------------------------|------------------------------------------------------------------------------------------------------|-------------------------------------------------------------------------------------------------------------------------------------------------------------------------------------------------------------------------------------------------------------------------------------------------------------------------------------------------------------------------------------------------------------------------------------------------------------------------------------------------------------------------------------------------------|

For peer review only
