# Supplementary material for: Service use, clinical outcomes and user experience associated with urgent care services that use telephone-based digital triage: a systematic review
Source: PubMed Central journal article supplement — BMJ Open. 2022 Jan 3;12(1):e051569. doi: 10.1136/bmjopen-2021-051569 (PMC8724705; doi:10.1136/bmjopen-2021-051569), 2022-01-03
Supplement: bmjopen-2021-051569supp002.pdf [file bmjopen-2021-051569supp002.pdf]

**Appendix 2: Search terms used for Medline search**

| Concept      | Search terms                                                                                                                                                                             |
|--------------|------------------------------------------------------------------------------------------------------------------------------------------------------------------------------------------|
| Care setting | Primary care.mp OR Primary Health Care/ OR After-Hours Care/ OR Out of hours.mp OR Emergency care.mp OR Emergency Medical Services/ OR Urgent care OR Ambulatory Care AND                |
| Triage       | Triage.mp OR Triage/ OR Telephone consultation.mp AND                                                                                                                                    |
| Digital      | Digital OR Computer OR Software OR Online OR Internet OR Web OR Computerised OR Computerized OR electronic OR ECDS* OR CCDS* OR Decision Support Systems, Clinical/ OR Decision support* |
