# Supplementary material for: Service use, clinical outcomes and user experience associated with urgent care services that use telephone-based digital triage: a systematic review
Source: HighWire-hosted journal article supplement (doi:10.1136/bmjopen-2021-051569), 2022-01-01
Supplement: bmjopen-2021-051569supp004_data_supplement.pdf [file bmjopen-2021-051569supp004_data_supplement.pdf]

## Appendix 4 MMAT results - studies investigating patterns of triage advice urgency

| Quantitative Non-Randomised studies                |                                                                                               | Frederick North 2011 | EJ Cook 2013  | Wen-Chin Hsu 2010 | F North 2010 | Zwaanswijk 2015 |
|----------------------------------------------------|-----------------------------------------------------------------------------------------------|----------------------|---------------|-------------------|--------------|-----------------|
| Screening questions                                | Are there clear research questions?                                                           | Yes                  | Yes           | Yes               | Yes          | Yes             |
|                                                    | Do the collected data allow to address the research questions?                                | Yes                  | Yes           | Yes               | Yes          | Yes             |
| Criteria for Quantitative (Non-randomised studies) | Are the participants representative of the target population?                                 | Yes                  | Yes           | Yes               | Yes          | Yes             |
|                                                    | Are measurements appropriate regarding both the outcome and intervention (or exposure)?       | Yes                  | Yes           | Yes               | Yes          | Yes             |
|                                                    | Are there complete outcome data?                                                              | No                   | No            | Yes               | Can't tell   | Yes             |
|                                                    | Are the confounders accounted for in the design and analysis?                                 | Can't tell           | Can't tell    | Can't tell        | Can't tell   | Can't tell      |
|                                                    | During the study period, is the intervention administered (or exposure occurred) as intended? | Yes                  | Yes           | Yes               | Yes          | Yes             |
|                                                    |                                                                                               | Medium (3/5)         | Medium (3/5)  | High (4/5)        | Medium (3/5) | High (4/5)      |
| Quantitative Descriptive studies                   |                                                                                               | F Payne 2005         | M Jacome 2018 | A Elliot 2011     | J Njeru 2017 |                 |
| Screening questions                                | Are there clear research questions?                                                           | yes                  | Yes           | Yes               | Yes          |                 |
|                                                    | Do the collected data allow to address the research questions?                                | yes                  | Yes           | Yes               | Yes          |                 |
| Criteria for Quantitative (Descriptive studies)    | Is the sampling strategy relevant to address the research question?                           | yes                  | Yes           | Yes               | Yes          |                 |
|                                                    | Is the sample representative of the target population?                                        | yes                  | Yes           | Yes               | Yes          |                 |
|                                                    | Are the measurements appropriate?                                                             | yes                  | Yes           | Yes               | Yes          |                 |
|                                                    | Is the risk of nonresponse bias low?                                                          | Yes                  | Yes           | Yes               | Yes          |                 |
|                                                    | Is the statistical analysis appropriate to answer the research question?                      | Yes                  | Yes           | Yes               | Yes          |                 |
|                                                    |                                                                                               | High (5/5)           | High (5/5)    | High (5/5)        | High (5/5)   |                 |

## MMAT results - studies investigating service use

|                     | Non-randomised studies                                                                        | Judy Foster 2002 | James Munro 2005 | James Munro 2000 | D Dunt 2005  | L Huibers 2013 | P Sprivulis 2003 | Morimura 2010 | J Dale 2003 |
|---------------------|-----------------------------------------------------------------------------------------------|------------------|------------------|------------------|--------------|----------------|------------------|---------------|-------------|
| Screening questions | Are there clear research questions?                                                           | Yes              | Yes              | Yes              | Yes          | Yes            | Yes              | Yes           | Yes         |
|                     | Do the collected data allow to address the research questions?                                | Yes              | Yes              | Yes              | Yes          | Yes            | Yes              | Yes           | Yes         |
| Quality criteria    | Are the participants representative of the target population?                                 | Yes              | Yes              | Yes              | Yes          | Yes            | Yes              | Yes           | Yes         |
|                     | Are measurements appropriate regarding both the outcome and intervention (or exposure)?       | Yes              | Yes              | Yes              | Yes          | Yes            | Yes              | Yes           | Yes         |
|                     | Are there complete outcome data?                                                              | Can't tell       | Can't tell       | Can't tell       | Can't tell   | Yes            | Yes              | Can't tell    | Yes         |
|                     | Are the confounders accounted for in the design and analysis?                                 | Can't tell       | Can't tell       | Yes              | No           | Yes            | Can't tell       | Can't tell    | Yes         |
|                     | During the study period, is the intervention administered (or exposure occurred) as intended? | Yes              | Yes              | Yes              | Yes          | Yes            | Yes              | Yes           | Yes         |
|                     | Quality score                                                                                 | Medium (3/5)     | Medium (3/5)     | High (4/5)       | Medium (3/5) | High (5/5)     | High (4/5)       | Medium (3/5)  | High (5/5)  |

|                     | <b>Quantitative descriptive studies</b>                                  | Geraldine Byrne 2007 | E Turbitt 2015 | V Lattimer 2000 | B Stewart 2006 | J Turner 2013 | N Siddiqui 2019 |
|---------------------|--------------------------------------------------------------------------|----------------------|----------------|-----------------|----------------|---------------|-----------------|
| Screening questions | Are there clear research questions?                                      | Yes                  | Yes            | Yes             | Yes            | Yes           | Yes             |
|                     | Do the collected data allow to address the research questions?           | Yes                  | Yes            | Yes             | Yes            | Yes           | Yes             |
| Quality criteria    | Is the sampling strategy relevant to address the research question?      | Yes                  | Can't tell     | Yes             | Yes            | Yes           | Yes             |
|                     | Is the sample representative of the target population?                   | Yes                  | Yes            | Can't tell      | Yes            | Yes           | Yes             |
|                     | Are the measurements appropriate?                                        | Yes                  | Yes            | Yes             | Yes            | Yes           | Yes             |
|                     | Is the risk of nonresponse bias low?                                     | Yes                  | No             | Can't tell      | Yes            | Yes           | Yes             |
|                     | Is the statistical analysis appropriate to answer the research question? | Yes                  | Yes            | Yes             | Yes            | Yes           | Yes             |
|                     | <b>Quality score</b>                                                     | High (5/5)           | Medium (3/5)   | Medium (3/5)    | High (5/5)     | High (5/5)    | High (5/5)      |

|                     | Mixed methods studies                                                                                                   | A Mark 2003      |
|---------------------|-------------------------------------------------------------------------------------------------------------------------|------------------|
| Screening questions | Are there clear research questions?                                                                                     | Yes              |
|                     | S2. Do the collected data allow to address the research questions?                                                      | Yes              |
| Quality criteria    | 5.1. Is there an adequate rationale for using a mixed methods design to address the research question?                  | Yes              |
|                     | 5.2. Are the different components of the study effectively integrated to answer the research question?                  | Yes              |
|                     | 5.3. Are the outputs of the integration of qualitative and quantitative components adequately interpreted?              | Can't tell       |
|                     | 5.4. Are divergences and inconsistencies between quantitative and qualitative results adequately addressed?             | Can't tell       |
|                     | 5.5. Do the different components of the study adhere to the quality criteria of each tradition of the methods involved? | Can't tell       |
|                     | <b>Quality score</b>                                                                                                    | <b>Low (2/5)</b> |

## MMAT results - studies investigating user experience

|                        | Qualitative Studies                                                                                | J Goode<br>2011 | Ewa<br>Winneby<br>2012 | A<br>Björkman<br>2018 | J Goode<br>2004 |
|------------------------|----------------------------------------------------------------------------------------------------|-----------------|------------------------|-----------------------|-----------------|
| Screening<br>questions | S1. Are there clear research questions?                                                            | Yes             | Yes                    | Yes                   | Yes             |
|                        | S2. Do the collected data allow to address the research questions?                                 | Yes             | Yes                    | Yes                   | Yes             |
| Quality criteria       | 1.1. Is the qualitative approach appropriate to answer the research question?                      | Yes             | Yes                    | Yes                   | Yes             |
|                        | 1.2. Are the qualitative data collection methods adequate to address the research question?        | Yes             | Yes                    | Yes                   | Yes             |
|                        | 1.3. Are the findings adequately derived from the data?                                            | Can't tell      | Can't tell             | Yes                   | Yes             |
|                        | 1.4. Is the interpretation of results sufficiently substantiated by data?                          | Yes             | Yes                    | Yes                   | Yes             |
|                        | 1.5. Is there coherence between qualitative data sources, collection, analysis and interpretation? | Yes             | Yes                    | Yes                   | Yes             |
|                        | Quality score                                                                                      | High (4/5)      | High (4/5)             | High (5/5)            | High (5/5)      |

|                     | Quantitative descriptive studies                                              | A O'Cathain 2014 | M Rahmqvist 2011 |
|---------------------|-------------------------------------------------------------------------------|------------------|------------------|
| Screening questions | S1. Are there clear research questions?                                       | Yes              | Yes              |
|                     | S2. Do the collected data allow to address the research questions?            | Yes              | Yes              |
| Quality criteria    | 4.1. Is the sampling strategy relevant to address the research question?      | Yes              | Yes              |
|                     | 4.2. Is the sample representative of the target population?                   | Can't tell       | Can't tell       |
|                     | 4.3. Are the measurements appropriate?                                        | Yes              | Yes              |
|                     | 4.4. Is the risk of nonresponse bias low?                                     | No               | No               |
|                     | 4.5. Is the statistical analysis appropriate to answer the research question? | Yes              | Yes              |
|                     | Quality score                                                                 | Medium (3/5)     | Medium (3/5)     |

|                                                                                                                         |                   |
|-------------------------------------------------------------------------------------------------------------------------|-------------------|
| <b>Mixed methods study</b>                                                                                              | A McAteer<br>2016 |
| S1. Are there clear research questions?                                                                                 | Yes               |
| S2. Do the collected data allow to address the research questions?                                                      | Yes               |
| 5.1. Is there an adequate rationale for using a mixed methods design to address the research question?                  | Yes               |
| 5.2. Are the different components of the study effectively integrated to answer the research question?                  | Yes               |
| 5.3. Are the outputs of the integration of qualitative and quantitative components adequately interpreted?              | Yes               |
| 5.4. Are divergences and inconsistencies between quantitative and qualitative results adequately addressed?             | Yes               |
| 5.5. Do the different components of the study adhere to the quality criteria of each tradition of the methods involved? | Yes               |
| <b>Quality score</b>                                                                                                    | <b>High (5/5)</b> |
