# Supplementary material for: Service use, clinical outcomes and user experience associated with urgent care services that use telephone-based digital triage: a systematic review
Source: HighWire-hosted journal article supplement (doi:10.1136/bmjopen-2021-051569), 2022-01-01
Supplement: bmjopen-2021-051569supp006_data_supplement.pdf [file bmjopen-2021-051569supp006_data_supplement.pdf]

Supplementary table 2: Change in wider healthcare service use following digital triage implementations (8 studies)

| First author<br>Year<br>Country<br>Reference | Study type                                    | Sample / data size                                                                                            | Staff conducting digital triage             | Participants       | Comparator                                | Findings relating to change in wider health care service use (primary care, hospitalisations, ambulance services, ED attendance)                                                                                                                                                                                                                                                                                                                                                                                                                                                              |
|----------------------------------------------|-----------------------------------------------|---------------------------------------------------------------------------------------------------------------|---------------------------------------------|--------------------|-------------------------------------------|-----------------------------------------------------------------------------------------------------------------------------------------------------------------------------------------------------------------------------------------------------------------------------------------------------------------------------------------------------------------------------------------------------------------------------------------------------------------------------------------------------------------------------------------------------------------------------------------------|
| Lattimer<br>2000<br>England<br>32            | Cost effectiveness report of controlled trial | >14000<br>Control group (n = 7308 calls)<br>Intervention group (Nurse telephone consultation): (n=7184 calls) | Nurse (within general practice cooperative) | General population | Usual care (referral to a GP)             | <b>Primary care:</b> During intervention period GPs made 428 fewer home visits, generating savings of £3360 (£2578 to £4198) in a year.<br><b>Hospitalisations:</b> The cost of providing nurse telephone consultation was £81 237 per annum; cost savings were estimated to be £94 422 due to reduction of other costs for the NHS arising from reduced emergency admissions to hospital.                                                                                                                                                                                                    |
| Munro<br>2000<br>England<br>29               | Routine data analysis                         | Study corresponds to the 1st year of operation: 68 500 NHS direct calls from the 1.3 million people served.   | Nurse                                       | General population | Service use in regions with no NHS direct | <b>Primary care:</b> There was a significant decrease in use of GP cooperatives at sites using digital triage: change in estimated trend from increase of 2.0% per month before to – 0.8% afterwards (estimated relative change – 2.9% (95% confidence interval (CI)– 4.2% to – 1.5%)) compared to negligible change in control: from 0.8% a month before to 0.9% afterwards (relative change 0.1%; CI: – 0.9% to 1.1%))<br><b>Ambulance services:</b> Changes in trends were small and non-significant<br><b>ED attendances:</b> Changes in trends were small, variable and not significant. |

|                                           |                                                                 |                                                                                        |                                       |                                                                  |                                                                  |                                                                                                                                                                                                                                                                                                                                                                                                                                                                                                                                                                                                                                                                                                         |
|-------------------------------------------|-----------------------------------------------------------------|----------------------------------------------------------------------------------------|---------------------------------------|------------------------------------------------------------------|------------------------------------------------------------------|---------------------------------------------------------------------------------------------------------------------------------------------------------------------------------------------------------------------------------------------------------------------------------------------------------------------------------------------------------------------------------------------------------------------------------------------------------------------------------------------------------------------------------------------------------------------------------------------------------------------------------------------------------------------------------------------------------|
| <b>Dale<br/>2003<br/>England<br/>36</b>   | Controlled trial                                                | 635 calls digitally triaged by ambulance service; 611 non-triaged calls                | Nurse and paramedic                   | Callers to emergency service for non-emergency concern (aged 2+) | Usual care (ambulance dispatch)                                  | <p><b>Ambulance services:</b> 52% (n=330) of calls were triaged as not requiring emergency ambulance. Of these: 47% had moderate urgency: care needed within 24 hours; 26% needed a routine appointment; 27% self care sufficient. Overall, 9.8% of ambulances were cancelled in the intervention groups (where this was offered).</p> <p><b>ED attendances:</b> In the intervention group: 81% of patients triaged as requiring ambulance call outs attended ED; 63.4% of patients triaged as not requiring ambulance attended ED.</p> <p><b>Hospitalisations:</b> Some inconsistency in triage: 10% of those triaged as not requiring ambulance dispatch subsequently required hospital admission</p> |
| <b>Mark<br/>2003<br/>England<br/>46</b>   | Mixed methods (routine data analysis + observation, interviews) | Numbers of calls analysed across three years: 5126 (year 1998) 5702 (1999) 4698 (2000) | Nurse                                 | General population                                               | Service use before implementation                                | <p><b>Primary care:</b> Two main 'transitions': 1. Initial increase in GP cooperative workload and in-hours calls. Followed by fall in OOH GP cooperative workload by 18%. Use of primary care centres declined following the arrival of NHS Direct; allocation of home visits initially increased then decreased; OOH doctor advice progressively increased. Within older age groups: decline in both use of primary care centres and home visits, but a rise in doctor advice.</p> <p><b>ED attendances:</b> Progressive increase in ED attendance</p>                                                                                                                                                |
| <b>Dunt<br/>2005<br/>Australia<br/>30</b> | Four controlled trials                                          | Random sampling (350 households per trial site)                                        | Nurse (Two "standalone" call centres) | General population                                               | 1. Service use before implementation<br>2. Implementation of two | <p><b>Primary care:</b> Some types of out of hours care became more frequent in sites using digital triage services</p> <p><b>Ambulance services:</b> Overall no change in any site</p>                                                                                                                                                                                                                                                                                                                                                                                                                                                                                                                 |

|                                       |                                                 |                                                                                                                                   |                                     |                    |                                                                                        |                                                                                                                                                                                                                                                                                                                                                                                                                                                                                                                                                                                                                                                             |
|---------------------------------------|-------------------------------------------------|-----------------------------------------------------------------------------------------------------------------------------------|-------------------------------------|--------------------|----------------------------------------------------------------------------------------|-------------------------------------------------------------------------------------------------------------------------------------------------------------------------------------------------------------------------------------------------------------------------------------------------------------------------------------------------------------------------------------------------------------------------------------------------------------------------------------------------------------------------------------------------------------------------------------------------------------------------------------------------------------|
|                                       |                                                 |                                                                                                                                   |                                     |                    | telephone triage sites within existing 'embedded services' using paper based protocols |                                                                                                                                                                                                                                                                                                                                                                                                                                                                                                                                                                                                                                                             |
| <b>Munro 2005 England 28</b>          | Surveys with care providers                     | 571 surveys sent (188/297) responses from GP cooperatives, (35/35) for ambulance services and (200/239) for emergency departments | Nurse                               | General population | Service use before implementation                                                      | <p><b>Primary care:</b> The 3 year period following digital triage implementation was associated with a reduction in calls to OOH general practice. In the context of an underlying trend of demand rising by about 1% each year, the introduction of digital triage was associated with an immediate 3% fall in demand coupled with a reversal of the trend so that demand began to fall by almost 8% per year</p> <p><b>Ambulance services:</b> No significant change in emergency ambulance service use.</p> <p><b>ED attendances:</b> There was negligible change in use of emergency departments,.</p>                                                 |
| <b>Morimura 2010 Japan (Tokyo) 35</b> | Routine data analysis (+ surveys with patients) | 26,138 telephone consultations                                                                                                    | Nurse and non-clinical call handler | General population | Service before implementation,                                                         | <p><b>Ambulance services:</b> Number of ambulances used per 1 million was statistically reduced compared with that of the previous year: 46 846 vs. 44 689, <math>p &lt; 0.0001</math>. The out of hours ambulance use per 1 million people was also significantly reduced: 31 965 vs. 30 370.</p> <p><b>Hospitalisations:</b> In those who were referred to a hospital by an ambulance (<math>n = 3252</math>) 30.8% (1000 cases) were hospitalised. The emergency hospitalisation rate (EHR) decreased annually before the introduction of digital triage service. However, the rate after its introduction was statistically higher 36.5% vs. 37.8%,</p> |

|                               |                       |                                                    |                           |                    |                                                               |                                                                                                                                                                                                                                                                                                                                                                                                                                                                                                                                                                                                                          |
|-------------------------------|-----------------------|----------------------------------------------------|---------------------------|--------------------|---------------------------------------------------------------|--------------------------------------------------------------------------------------------------------------------------------------------------------------------------------------------------------------------------------------------------------------------------------------------------------------------------------------------------------------------------------------------------------------------------------------------------------------------------------------------------------------------------------------------------------------------------------------------------------------------------|
|                               |                       |                                                    |                           |                    |                                                               | p<0.0001)(EHR increased following the introduction of the service).                                                                                                                                                                                                                                                                                                                                                                                                                                                                                                                                                      |
| <b>Turner 2013 England 38</b> | Routine data analysis | 400,000 calls in first year of operation analysed. | Non-clinical call handler | General population | Control sites selected to match equivalent geographical areas | <p><b>Primary care:</b> In one site - statistically significant reduction in urgent care attendances; 3 sites: reduction in calls to former (nurse led) digital triage service. Overall no change in primary care could be attributed to implementation</p> <p><b>Ambulance services:</b> Reduction in ambulance emergency calls in 1 site and an increase in another site; All sites showed increase in emergency ambulance incidents. Overall no change in emergency service (999) calls were attributable to implementation</p> <p><b>ED attendances:</b> Overall no change could be attributed to implementation</p> |
